# Supplementary material for: Herb-target virtual screening and network pharmacology for prediction of molecular mechanism of Danggui Beimu Kushen Wan for prostate cancer
Source: PubMed Central journal article supplement (PMC7988104; doi:10.1038/s41598-021-86141-1), 2021-03-23
Supplement: 41598_2021_86141_MOESM1_ESM.pdf [file 41598_2021_86141_MOESM1_ESM.pdf]

## Supplementary files for

### **Herb–target virtual screening and network pharmacology for prediction of molecular mechanism of Danggui Beimu Kushen Wan for prostate cancer**

Hong Li<sup>1</sup>, Andrew Hung<sup>2</sup>, Angela Wei Hong Yang<sup>1\*</sup>

<sup>1</sup> School of Health and Biomedical Sciences, RMIT University, Bundoora, Victoria 3083, Australia

<sup>2</sup> School of Science, RMIT University, Melbourne, Victoria 3000, Australia

\*Corresponding author:

Dr Angela Wei Hong Yang

Discipline of Chinese Medicine

School of Health and Biomedical Sciences

RMIT University

PO Box 71

Bundoora, Victoria 3083

Australia

Phone: 61-3-9925 7175

Fax: 61-3-9925 7178

Email: [angela.yang@rmit.edu.au](mailto:angela.yang@rmit.edu.au)

## Table of Contents

|                                                                                                                                                                                         |    |
|-----------------------------------------------------------------------------------------------------------------------------------------------------------------------------------------|----|
| Supplementary Figures .....                                                                                                                                                             | 3  |
| Supplementary Figure S1. Molecular structures of 18 compounds that could not be found in PubChem from <i>Angelicae Sinensis Radix</i> .....                                             | 3  |
| Supplementary Figure S2. Molecular structures of 15 compounds of <i>Fritillariae Thunbergii Bulbus</i> that could not be found in PubChem. ....                                         | 5  |
| Supplementary Figure S3. Molecular Structures of 94 Compounds that could not be found in PubChem from <i>Sophorae Flavescentis Radix</i> . ....                                         | 6  |
| Supplementary Figure S4. Venn diagram summary of chemical compounds identified from Danggui Beimu Kushen Wan. ....                                                                      | 13 |
| Supplementary Figure S5. Flow chart of selection process for chemical compounds from Danggui Beimu Kushen Wan for molecular docking.....                                                | 14 |
| Supplementary Figure S6. Ligand–target interactions for compounds forming hydrogen bonds with one catalytic triad residue.....                                                          | 15 |
| Supplementary Tables.....                                                                                                                                                               | 22 |
| Supplementary Table S1. Summary of herbal compounds identified from Danggui Beimu Kushen Wan’s ingredients. ....                                                                        | 22 |
| Supplementary Table S2. Details of identified anti-cancer drugs from 2019 National Comprehensive Cancer Network Clinical Practice Guideline-Prostate Cancer and their drug targets..... | 60 |
| Supplementary Table S3. Summary of Kyoto Encyclopedia of Genes and Genomes enrichment of the included targets. ....                                                                     | 61 |
| Supplementary Table S4. Details of docking results between 621 natural compounds from Danggui Beimu Kushen Wan and 21 targets for prostate cancer (kcal/mol). ....                      | 65 |
| References.....                                                                                                                                                                         | 87 |

## Supplementary Figures

**Supplementary Figure S1. Molecular structures of 18 compounds that could not be found in PubChem from *Angelicae Sinensis Radix*.**

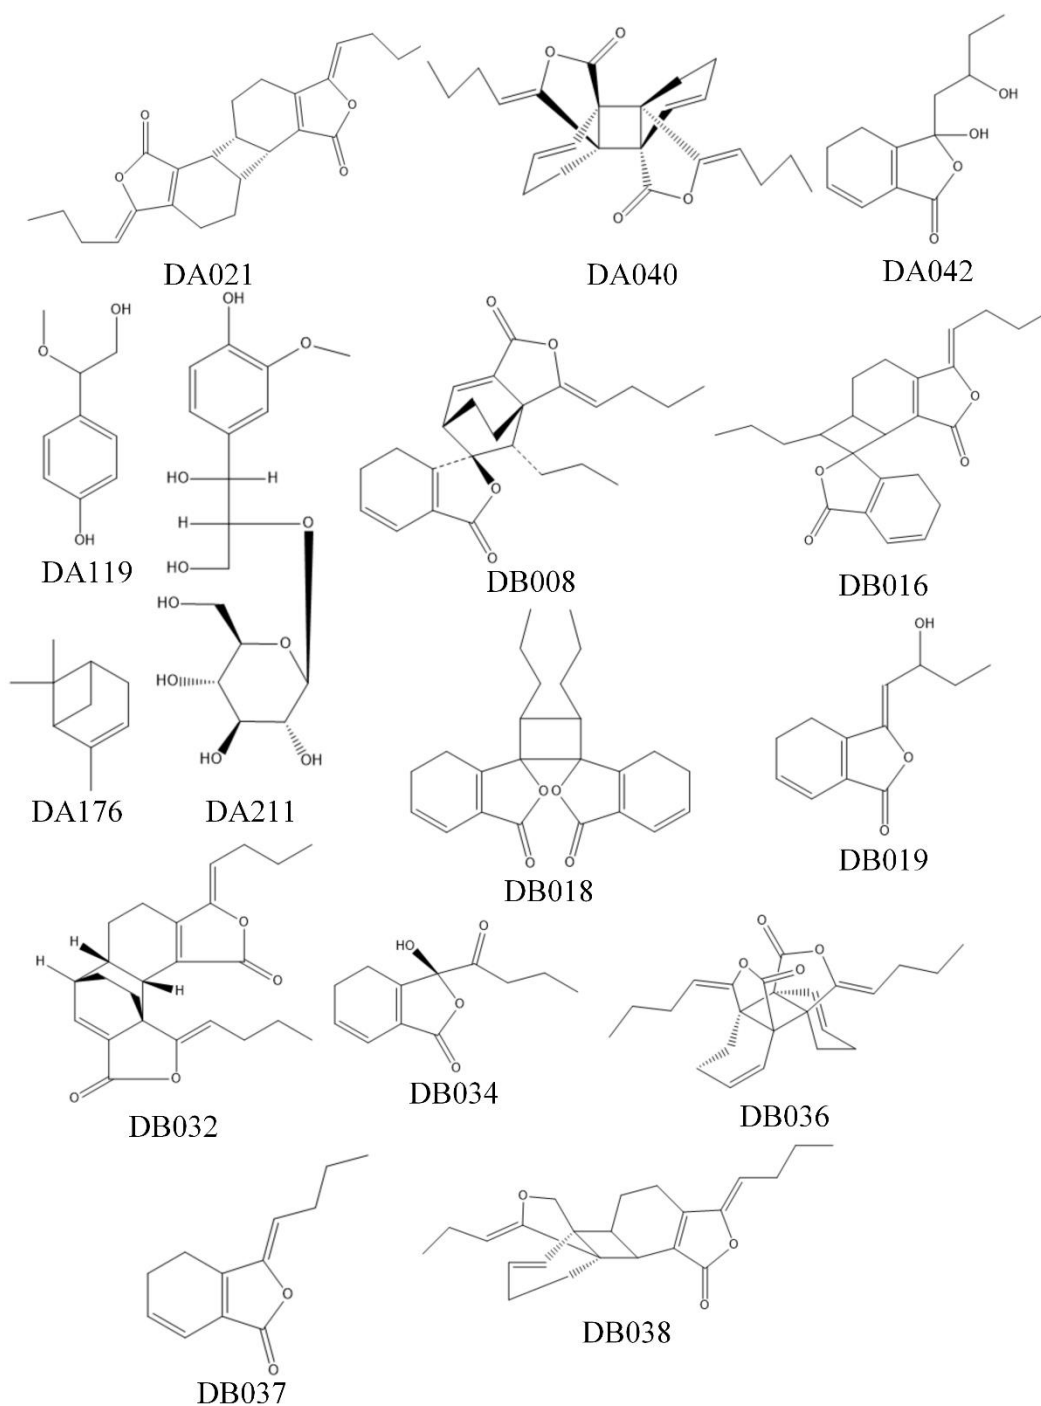

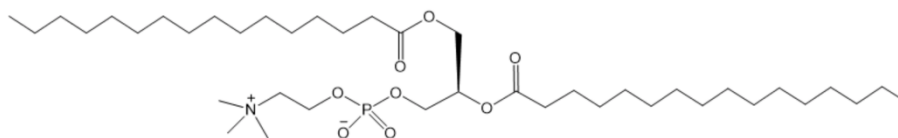

DE001

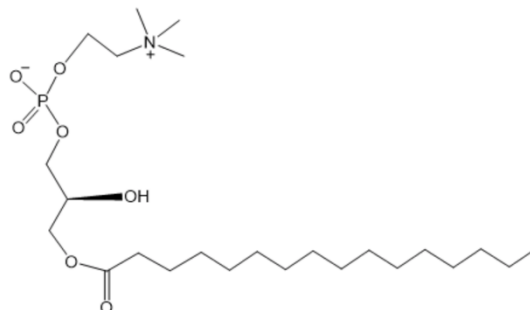

DE002

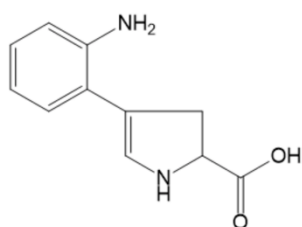

DI001

**Supplementary Figure S2. Molecular structures of 15 compounds of *Fritillariae*  
*Thunbergii* Bulbus that could not be found in PubChem.**

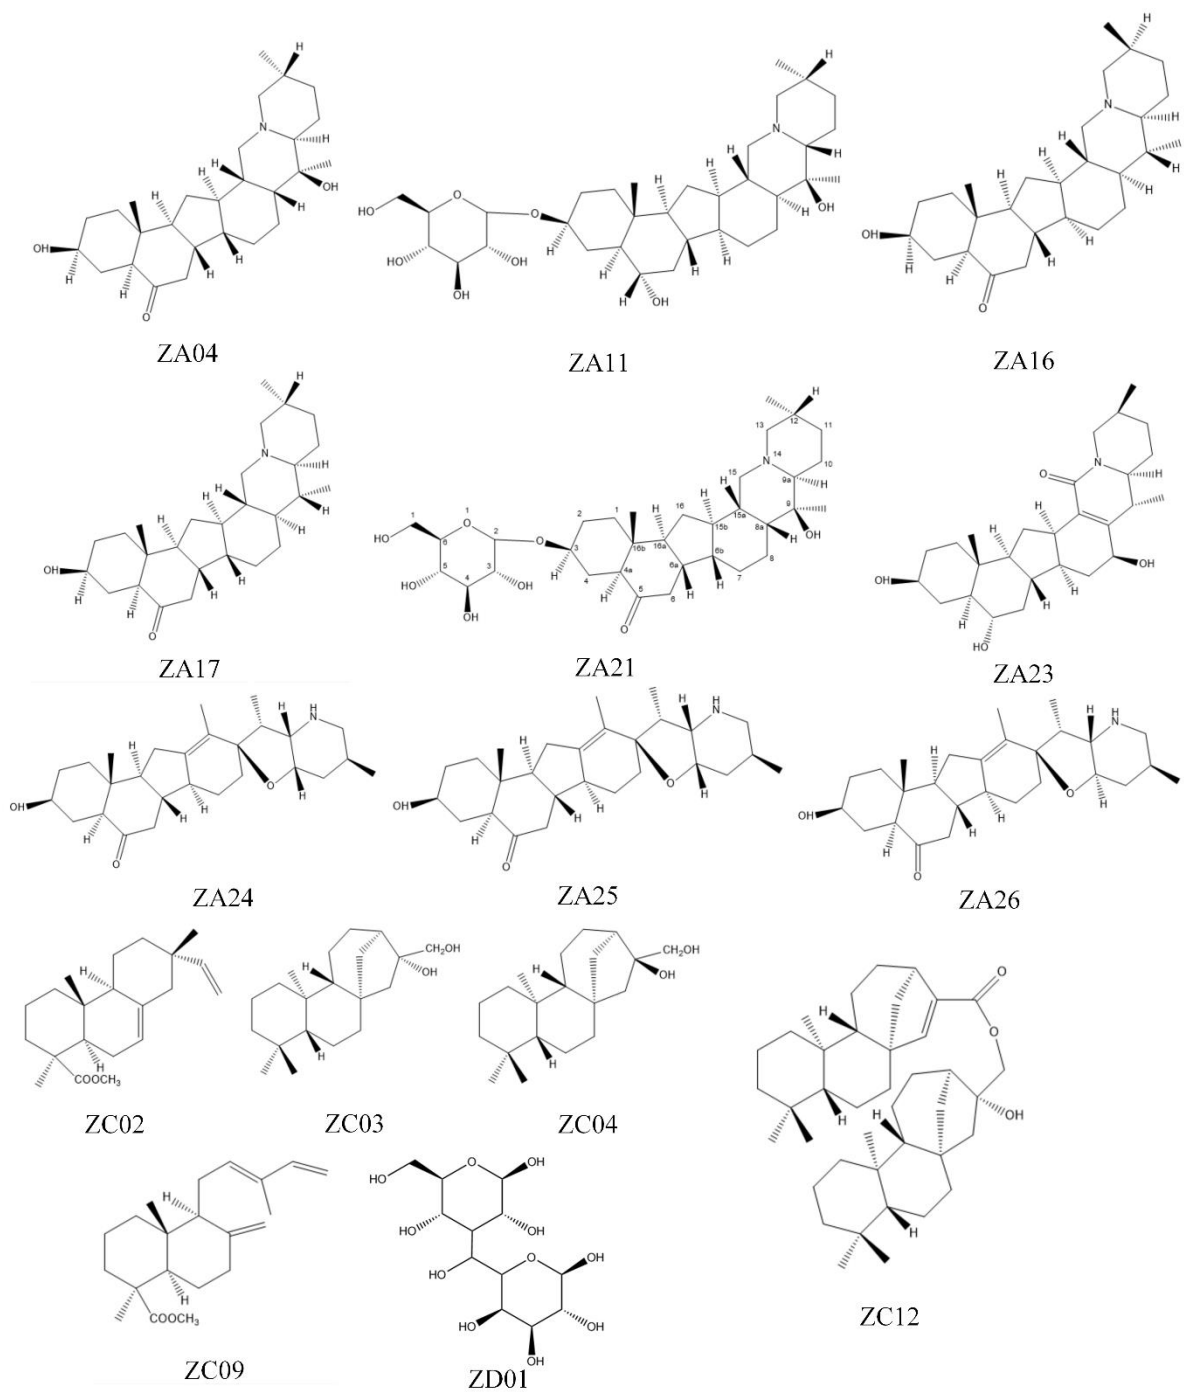

**Supplementary Figure S3. Molecular Structures of 94 Compounds that could not be found in PubChem from Sophorae Flavescents Radix.**

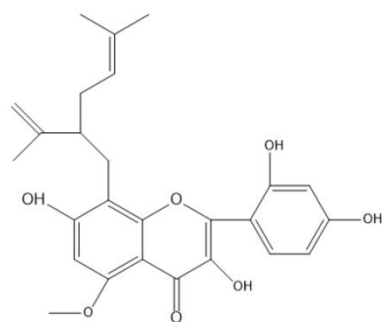

KA004

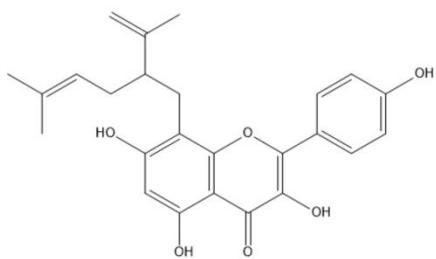

KA011

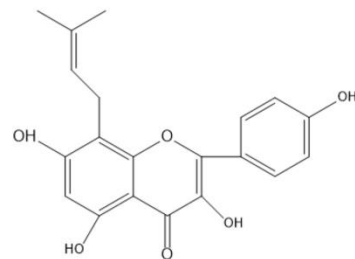

KA018

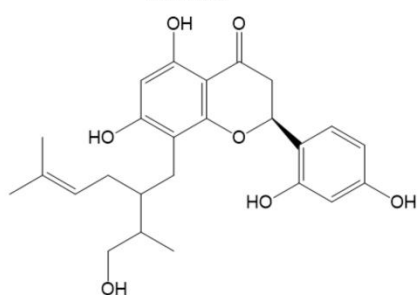

KA025

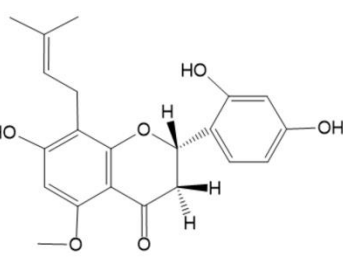

KA049

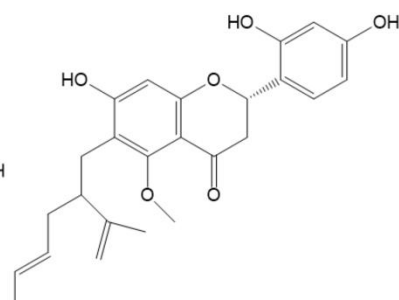

KA050

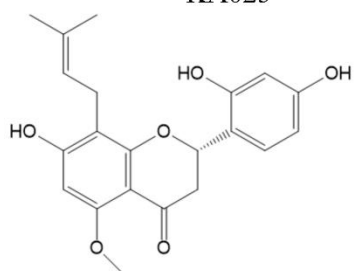

KA051

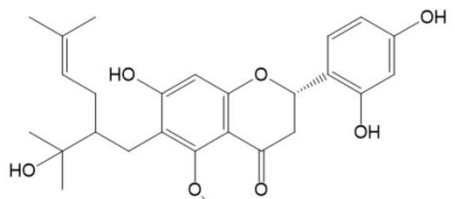

KA052

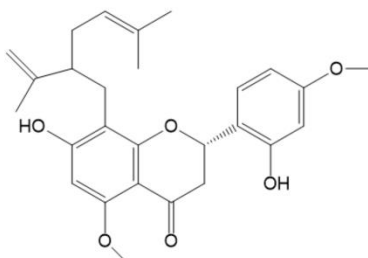

KA053

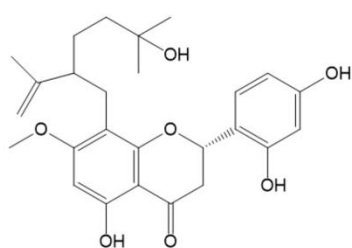

KA054

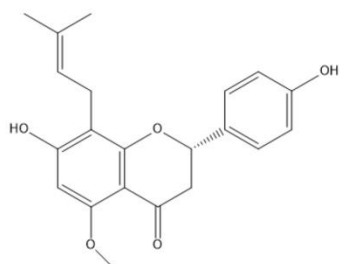

KA055

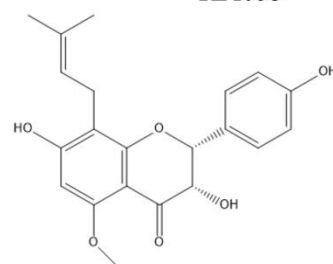

KA056

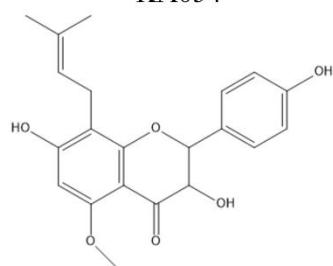

KA057

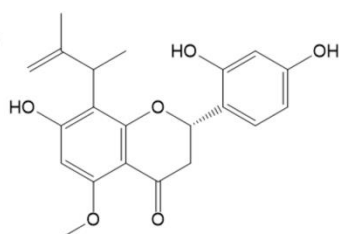

KA058

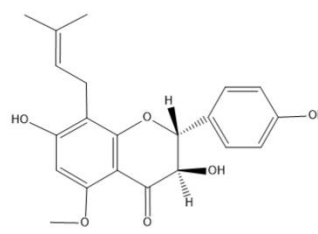

KA059

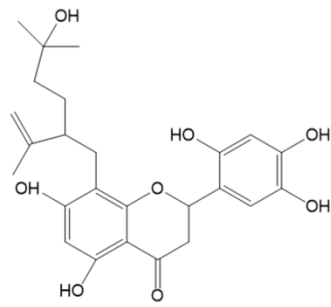

KA061

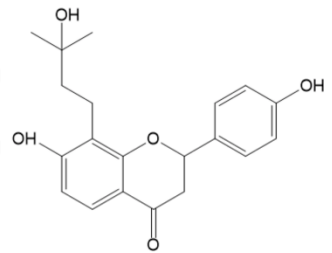

KA062

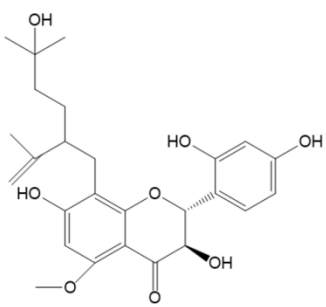

KA068

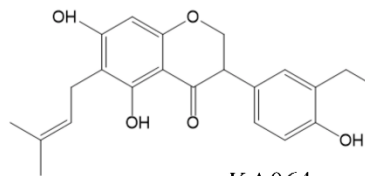

KA064

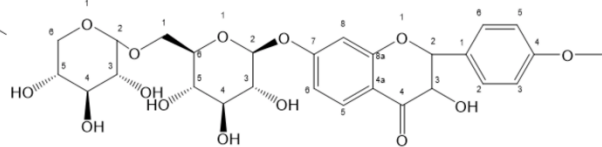

KA065

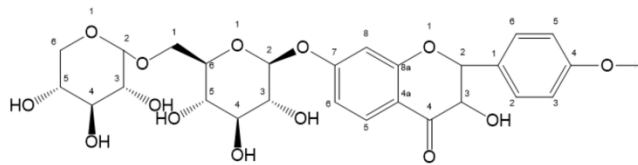

KA067

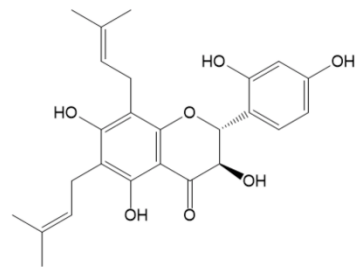

KA069

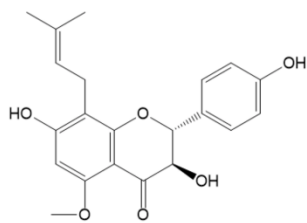

KA076

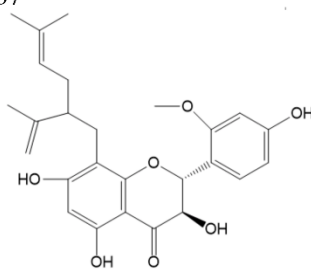

KA077

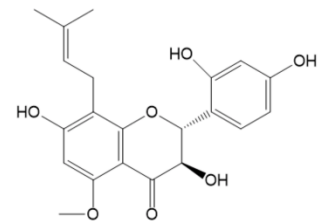

KA078

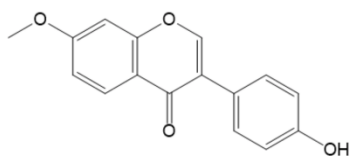

KA083

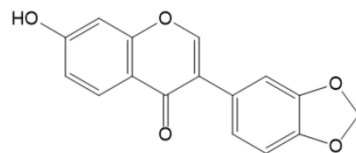

KA089

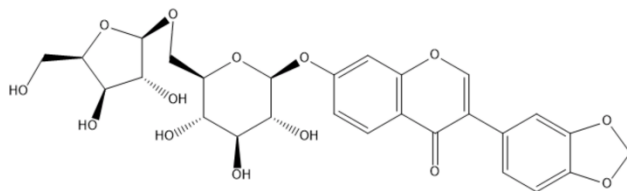

KA090

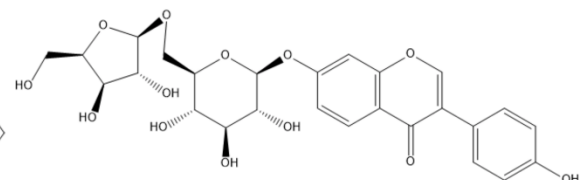

KA091

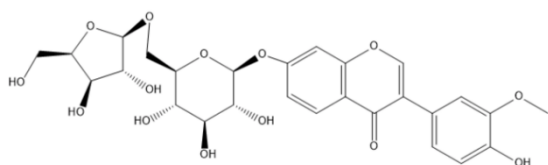

KA092

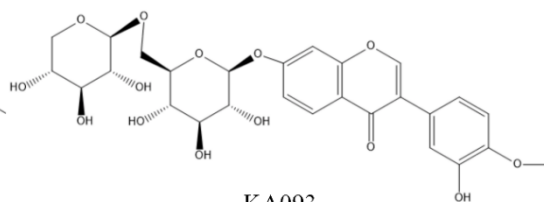

KA093

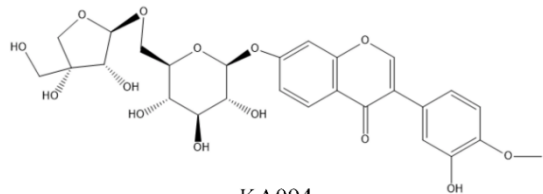

KA094

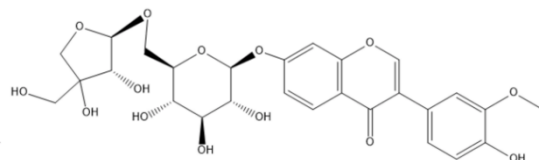

KA095

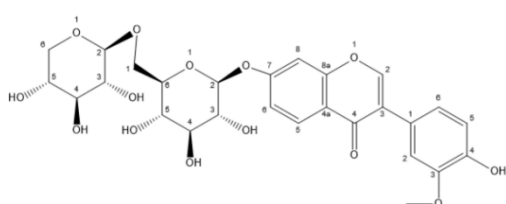

KA096

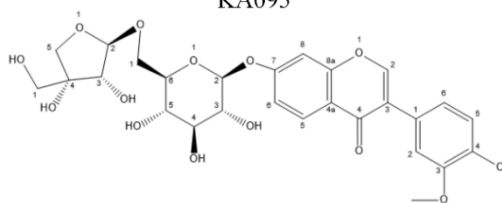

KA097

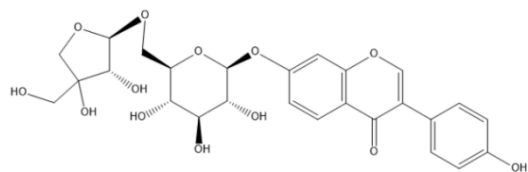

KA098

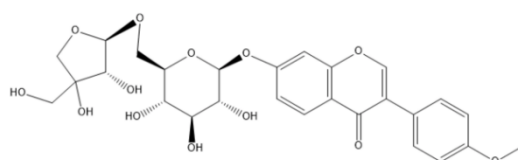

KA099

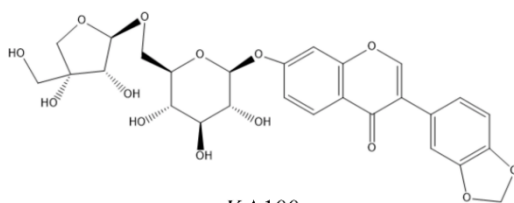

KA100

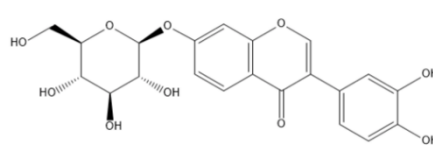

KA101

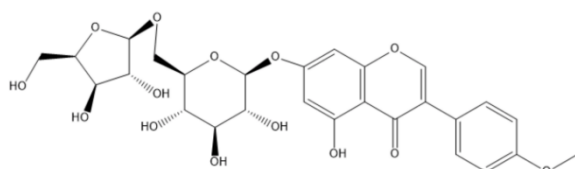

KA102

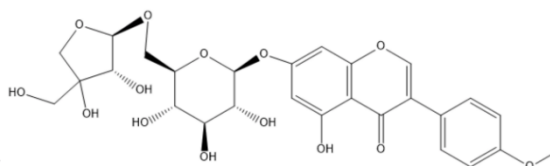

KA103

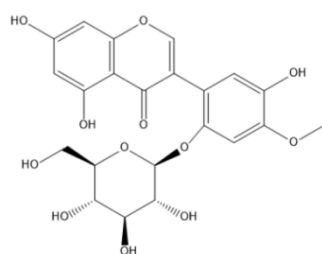

KA104

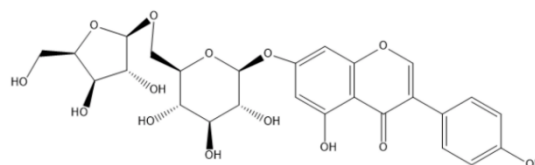

KA105



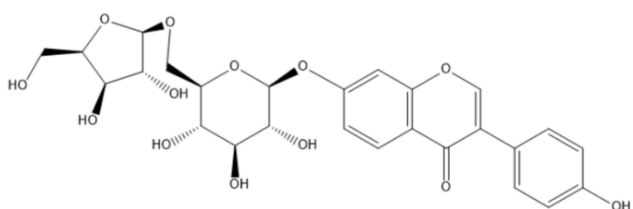

KA107

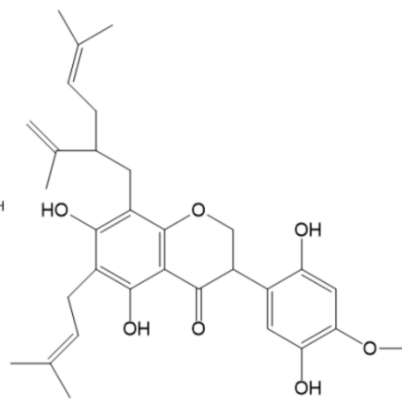

KA108

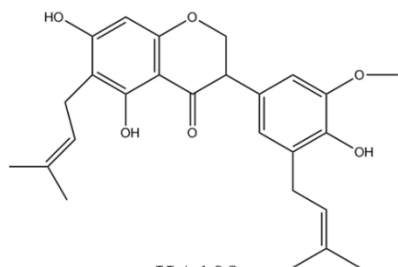

KA109

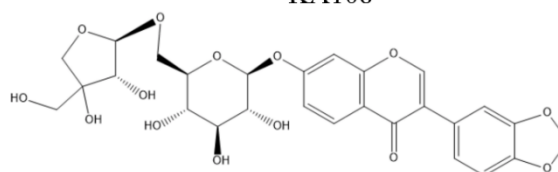

KA115

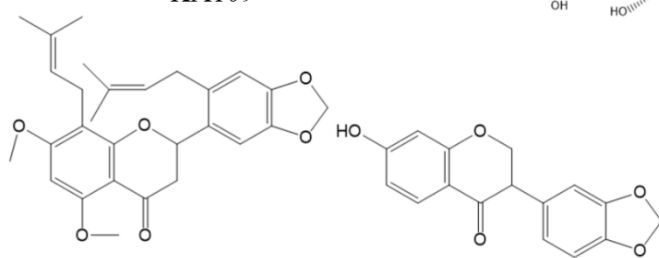

KA110

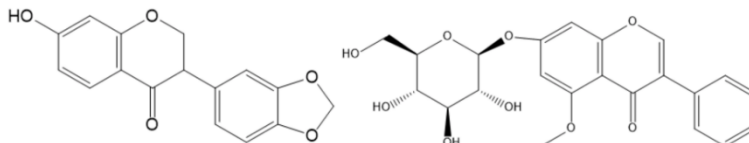

KA116

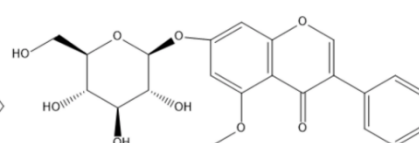

KA121

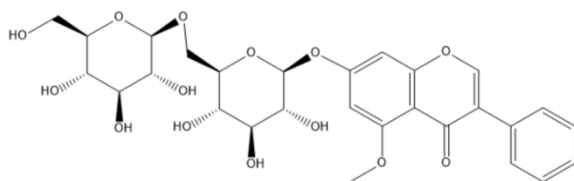

KA122

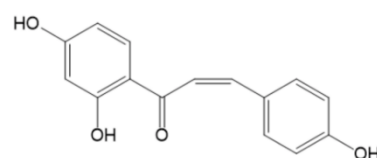

KA132

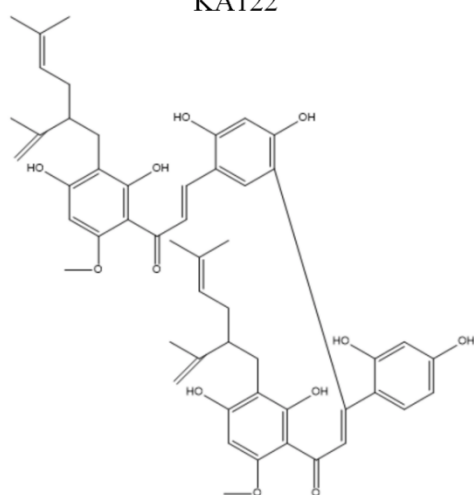

KA133

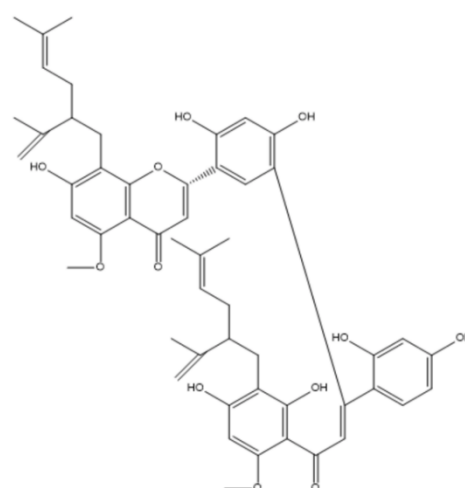

KA134

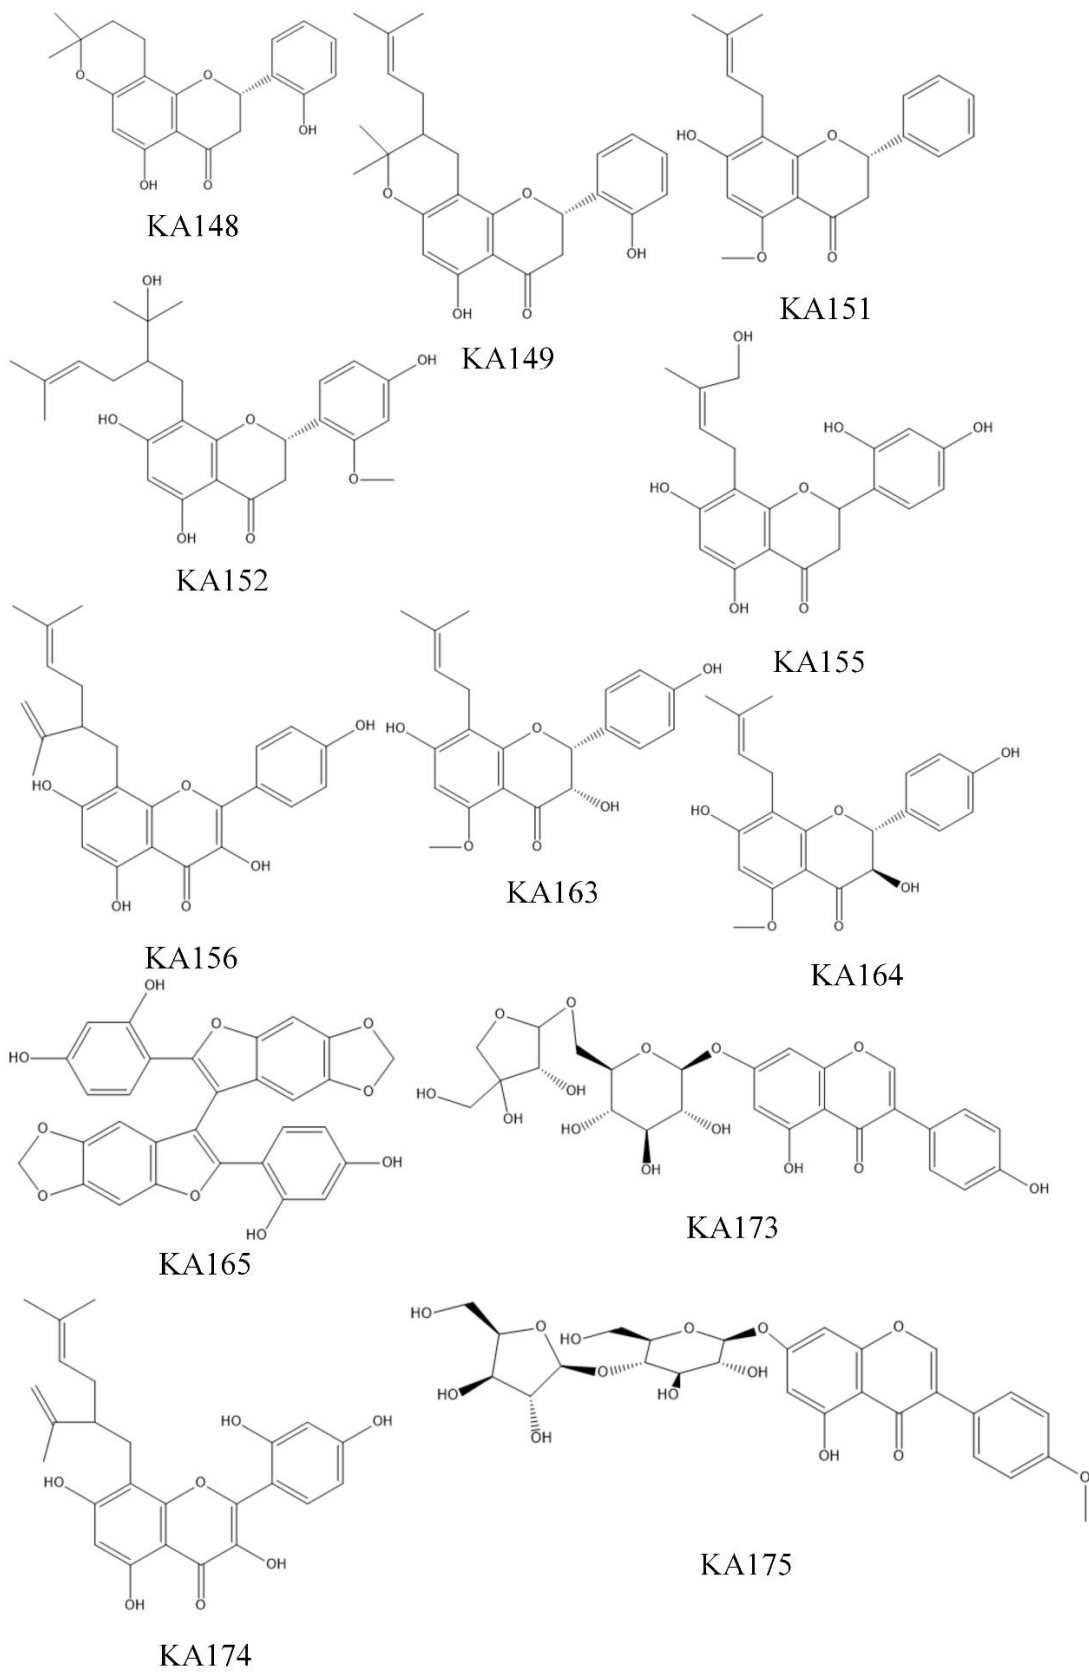

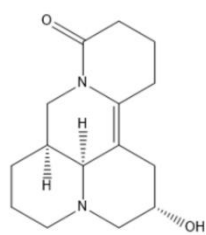

KB006

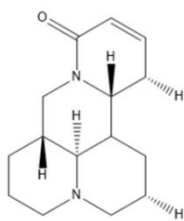

KB013

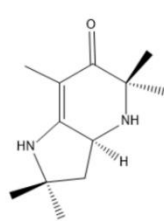

KB027

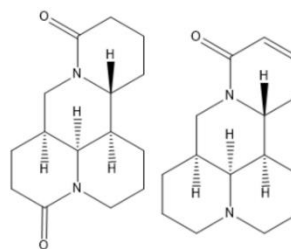

KB028

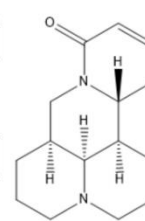

KB029

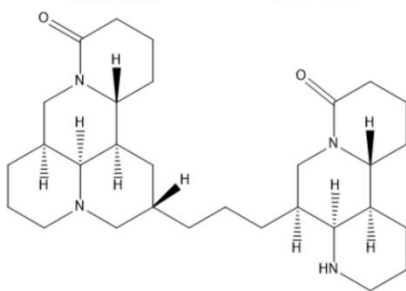

KB030

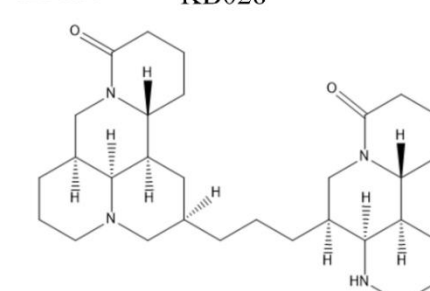

KB031

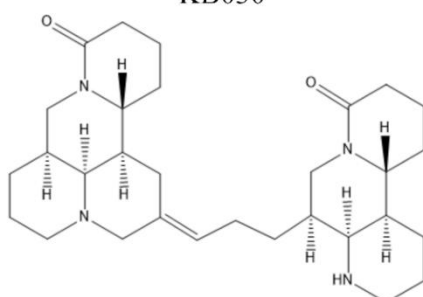

KB032

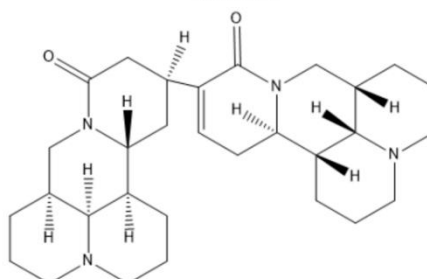

KB033

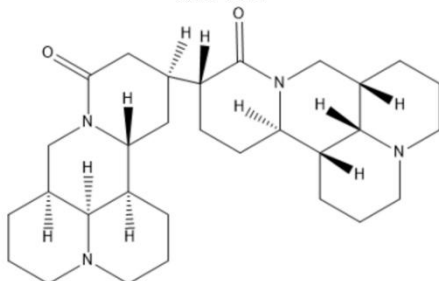

KB034

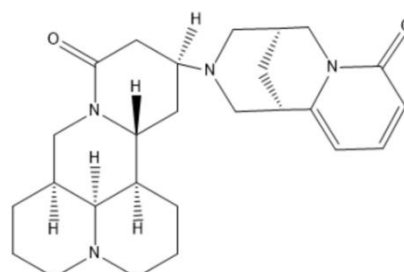

KB035

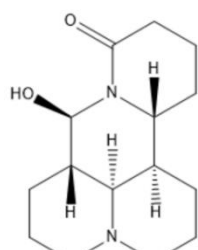

KB038

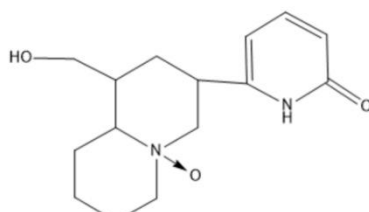

KB042

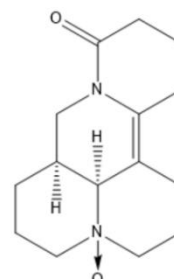

KB043

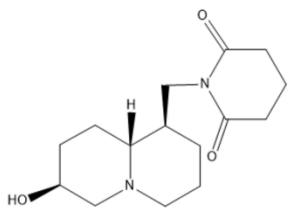

KB045

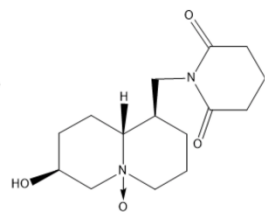

KB046

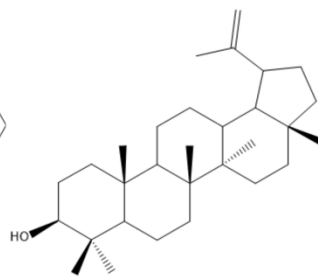

KC003

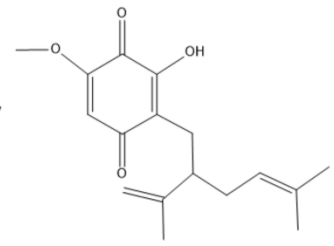

KJ001

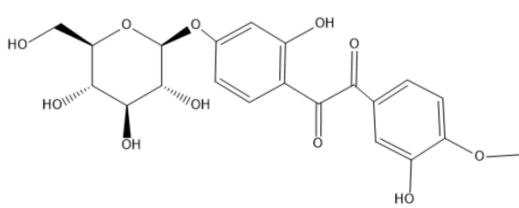

KE003

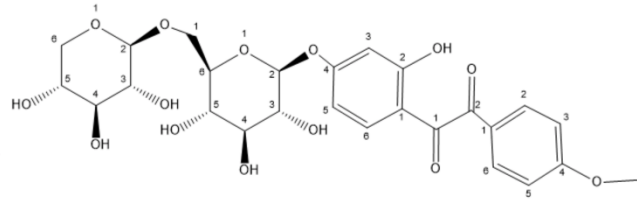

KE004

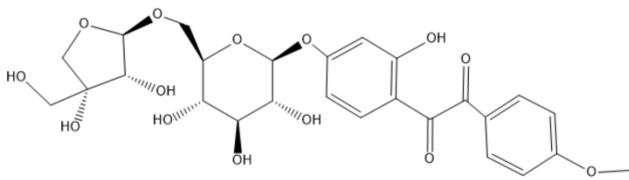

KE005

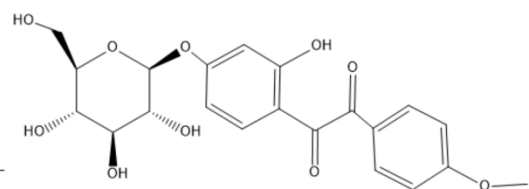

KE006

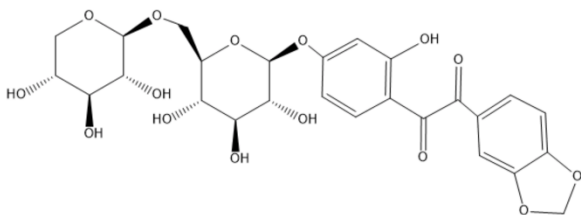

KE007

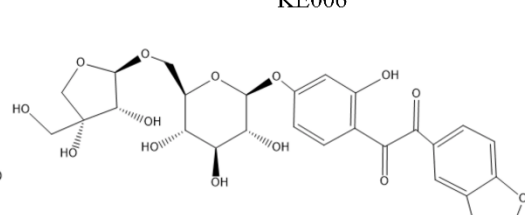

KE008

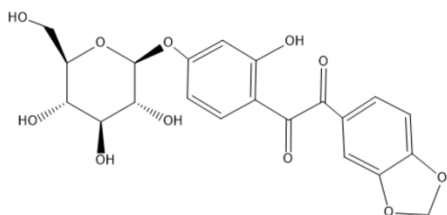

KE009

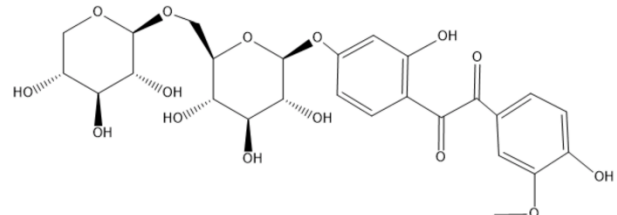

KE010

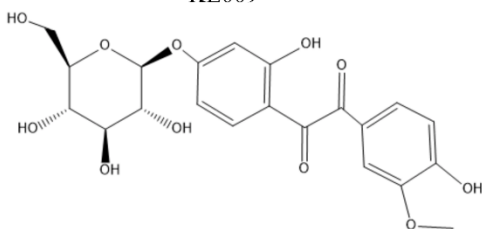

KE011

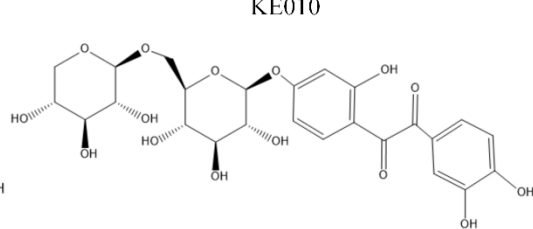

KE012

**Supplementary Figure S4. Venn diagram summary of chemical compounds identified from Danggui Beimu Kushen Wan.**

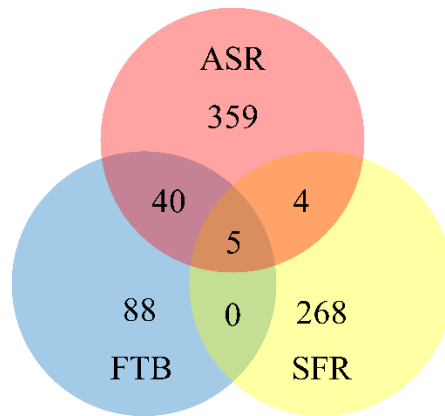

Note: ASR: *Angelicae Sinensis Radix*; FTB: *Fritillariae Thunbergii Bulbus*; SFR: *Sophorae Flavescentis Radix*.

**Supplementary Figure S5. Flow chart of selection process for chemical compounds from Danggui Beimu Kushen Wan for molecular docking.**

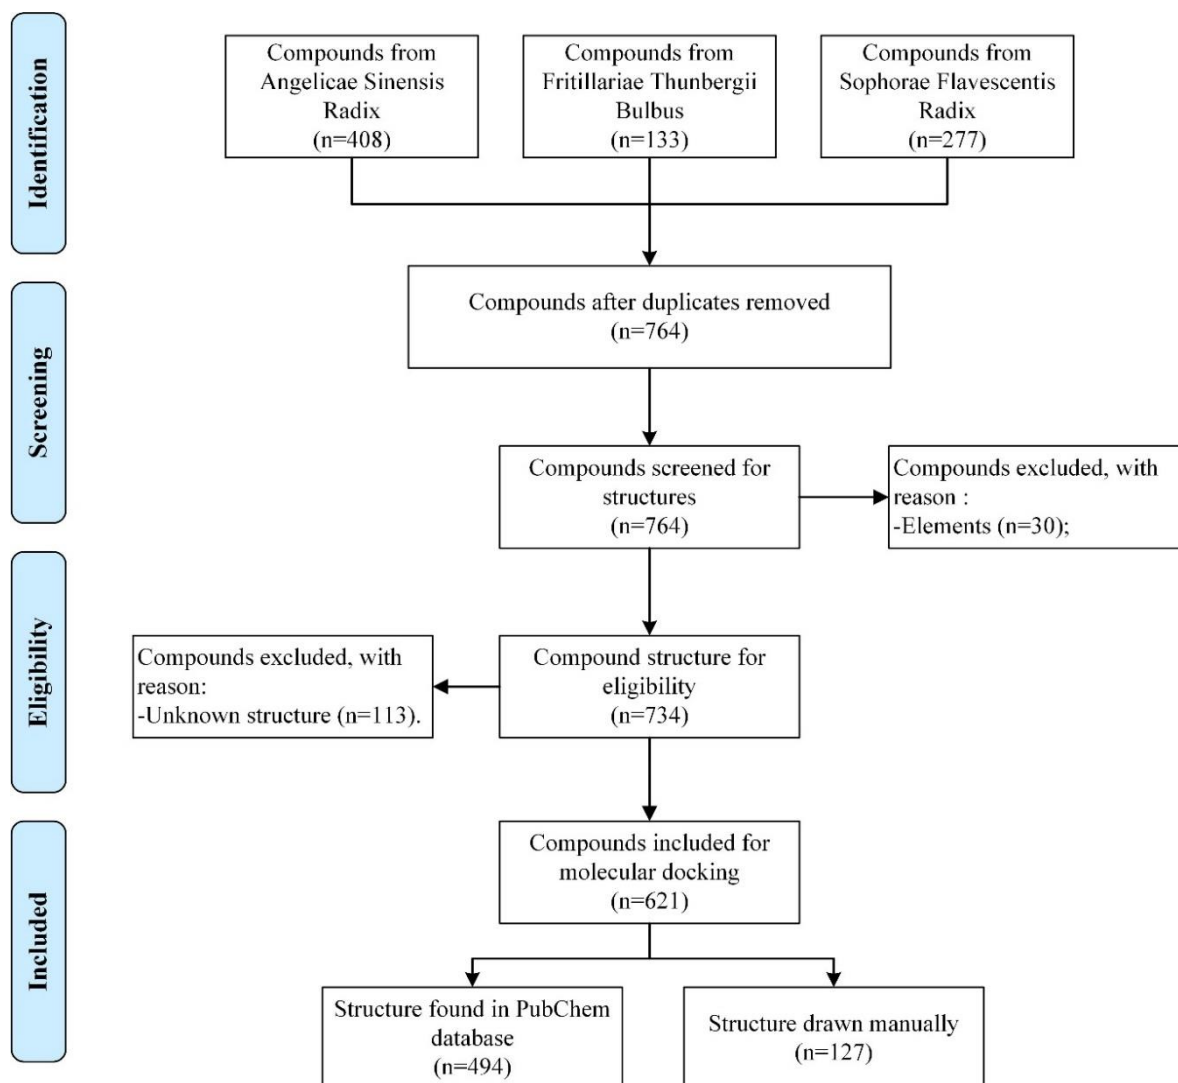

**Supplementary Figure S6. Ligand–target interactions for compounds forming hydrogen bonds with one catalytic triad residue.**

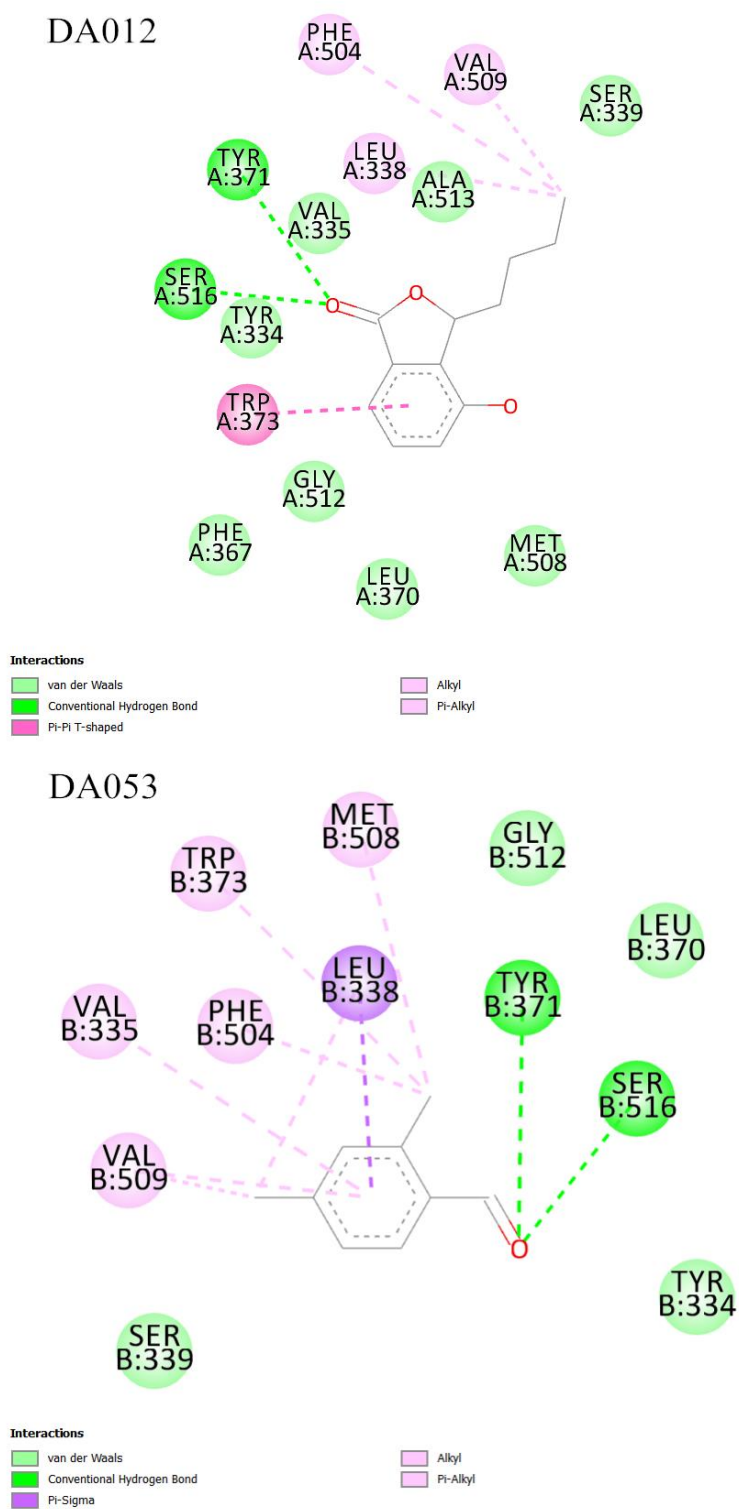

Note: DA012: 4-Hydroxy-3-butylphthalide; DA053: 2,4-Dimethylbenzaldehyde.

DA134

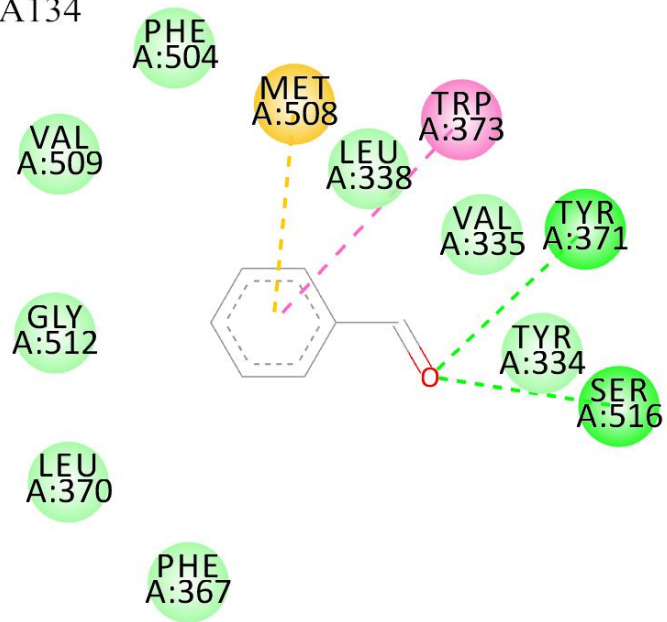

**Interactions**

van der Waals  
Conventional Hydrogen Bond

PI-Sulfur  
PI-PI T-shaped

DA216

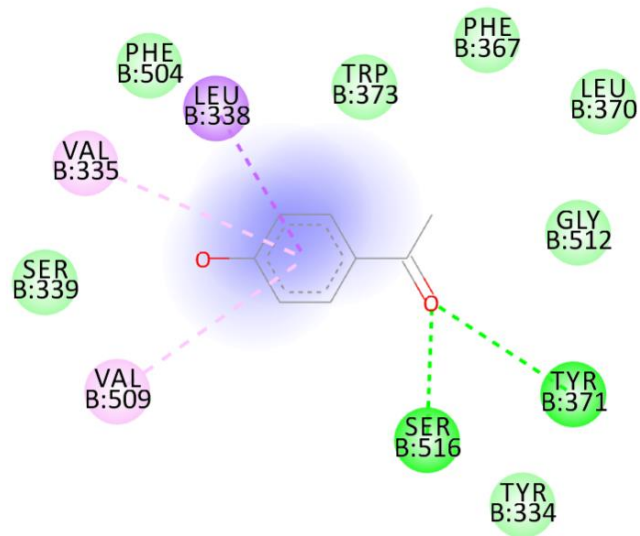

**Interactions**

van der Waals  
Conventional Hydrogen Bond

PI-Sigma  
PI-Alkyl

Note: DA134: Benzaldehyde; DA216: P-hydroxyacetophenone.



DB004

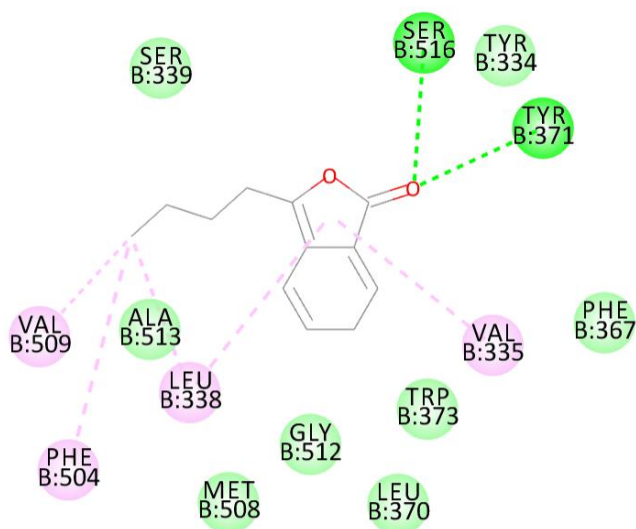

**Interactions**

- van der Waals
- Conventional Hydrogen Bond
- Alkyl
- PI-Alkyl

DB005

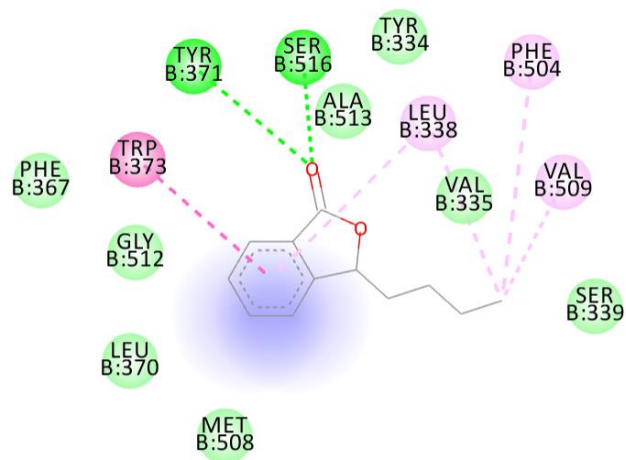

**Interactions**

- van der Waals
- Conventional Hydrogen Bond
- PI-PI T-shaped
- Alkyl
- PI-Alkyl

Note: DB004: E-butylideneephthalide; DB005: Butylphthalide.

DB024

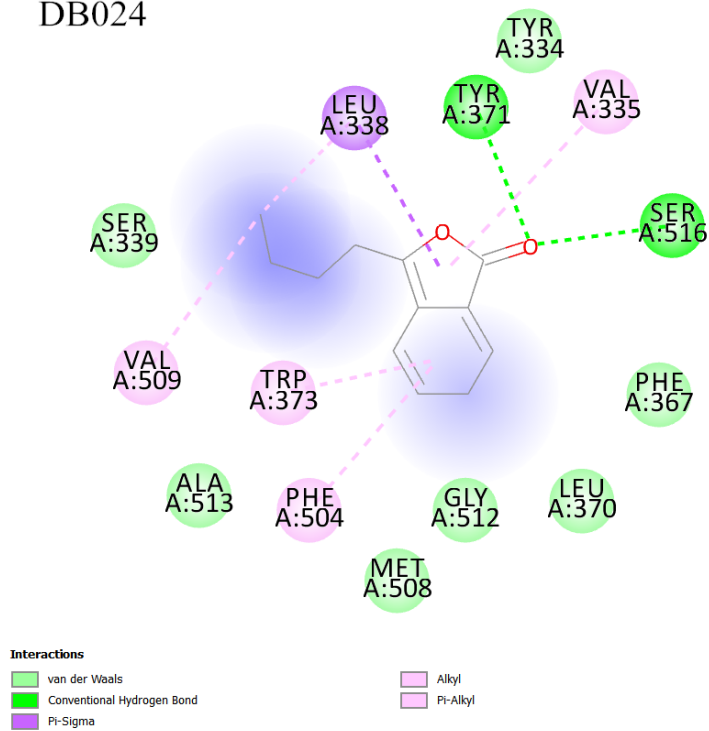

DA145

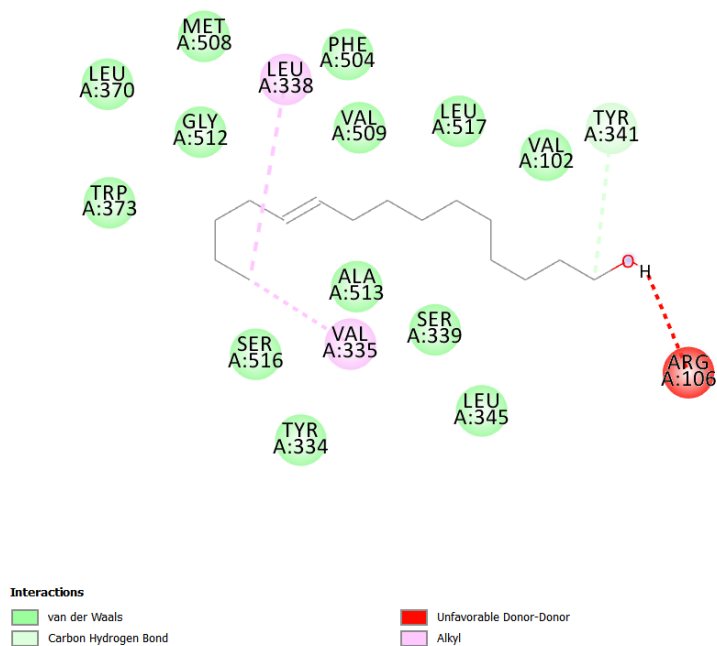

Note: DA145: E-10-pentadecenol; DB024: 3-Butylidenephthalide.

## DA153

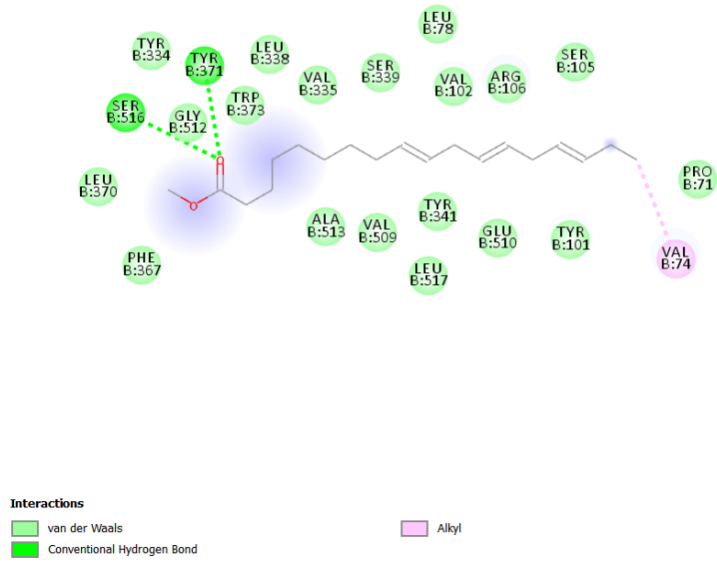

## DA165

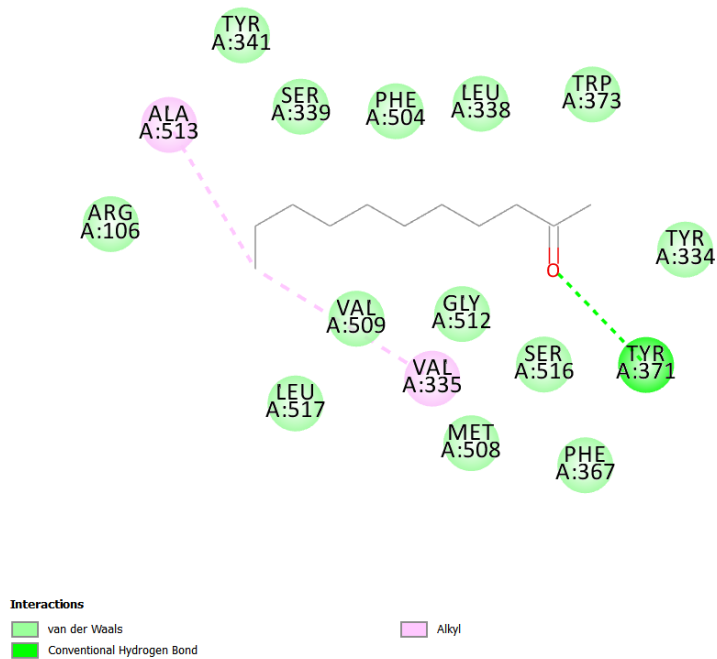

Note: DA153: Methyl linolenate; DA165: 2-Undecanone.

## DA172

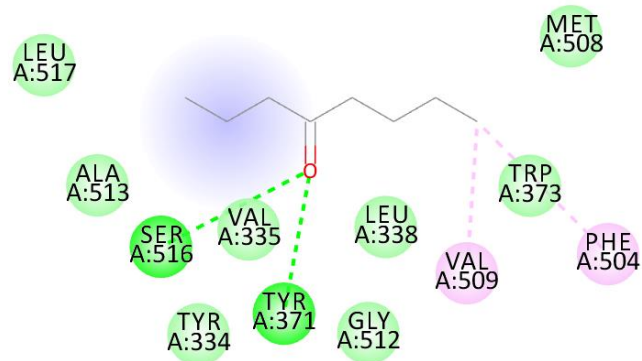

**Interactions**

- van der Waals
- Conventional Hydrogen Bond
- Alkyl
- Pi-Alkyl

## DA173

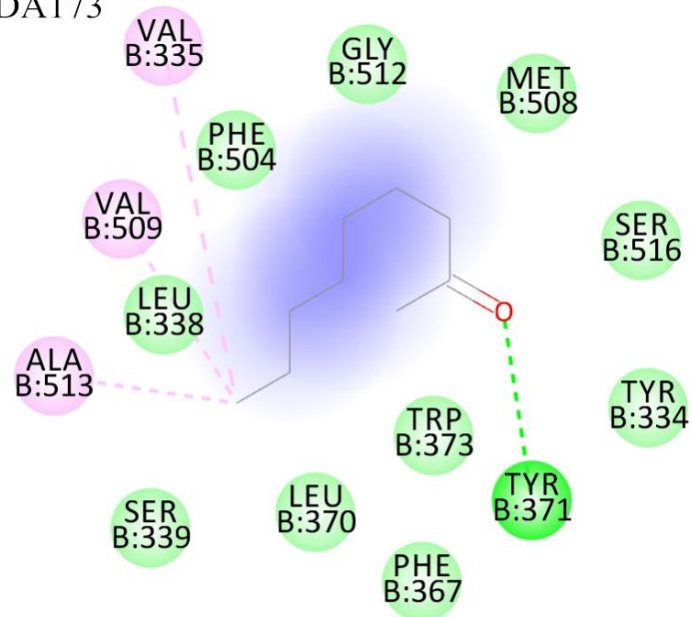

**Interactions**

- van der Waals
- Conventional Hydrogen Bond
- Alkyl

Note: DA172: 4-Octanone; DA173: 2-Nonanone.

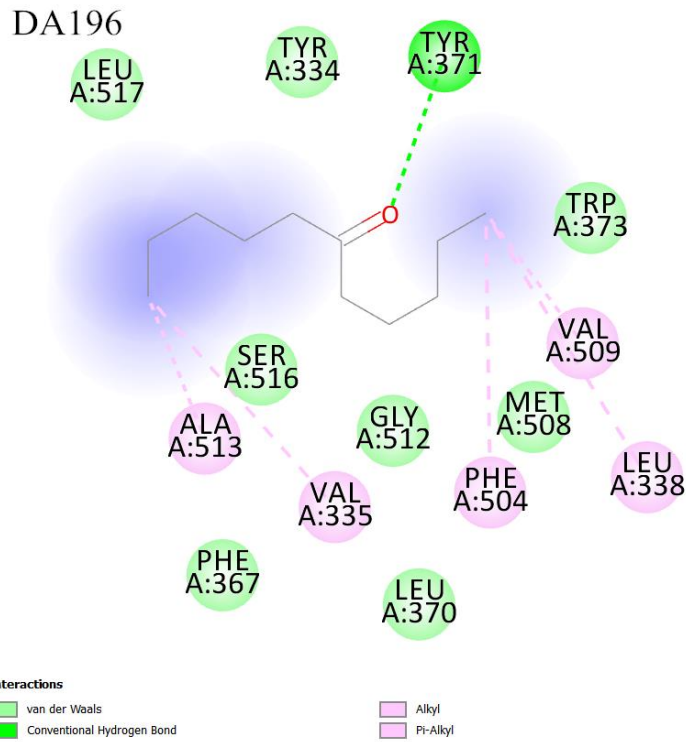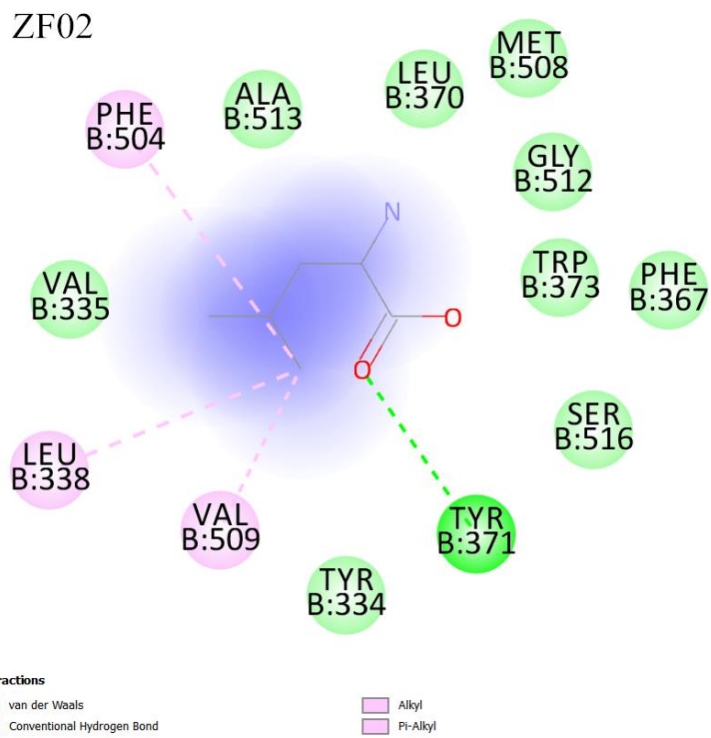

Note: DA196: 6-Undecanone; ZF02: Leucine.

## Supplementary Tables

**Supplementary Table S1. Summary of herbal compounds identified from Danggui Beimu KushenWan's ingredients.**

| No.                                | Derivatives and Constituents                 | Molecular Formula                              | PubChem CID/SID | Molecule Weight (g/mol) | References                                                                  |
|------------------------------------|----------------------------------------------|------------------------------------------------|-----------------|-------------------------|-----------------------------------------------------------------------------|
| <b>1. Angelicae Sinensis Radix</b> |                                              |                                                |                 |                         |                                                                             |
| <b>DA</b>                          | <b>Compounds from essential oils (n=216)</b> |                                                |                 |                         |                                                                             |
| DA001                              | Coniferyl ferulate                           | C <sub>20</sub> H <sub>20</sub> O <sub>6</sub> | 6441913         | 356.4                   | (Li et al., 2017; Ma et al., 2017; Y. Wang et al., 2016; Wei et al., 2016)  |
| DA002                              | (E)-Coniferin                                | C <sub>16</sub> H <sub>22</sub> O <sub>8</sub> | 3496897         | 342.34                  | (Wei et al., 2016)                                                          |
| DA003                              | Guaiacylglycerol                             | C <sub>10</sub> H <sub>14</sub> O <sub>5</sub> | 14579           | 214.21                  | (Wei et al., 2016)                                                          |
| DA004                              | Butanal                                      | C <sub>4</sub> H <sub>8</sub> O                | 261             | 72.11                   | (Li et al., 2016; Pei et al., 2017; Wei et al., 2016)                       |
| DA005                              | 3,5-dimethylbenzaldehyde                     | C <sub>9</sub> H <sub>10</sub> O               | 34225           | 134.17                  | (X. Wang et al., 2018; Wei et al., 2016)                                    |
| DA006                              | Camphene                                     | C <sub>10</sub> H <sub>16</sub>                | 6616            | 136.23                  | (Li et al., 2016; Wei et al., 2016)                                         |
| DA007                              | α-cedrene                                    | C <sub>15</sub> H <sub>24</sub>                | 6431015         | 204.35                  | (Wei et al., 2016)                                                          |
| DA008                              | α-terpinolene                                | C <sub>10</sub> H <sub>16</sub>                | 11463           | 136.23                  | (Wei et al., 2016)                                                          |
| DA009                              | Octadecane                                   | C <sub>18</sub> H <sub>38</sub>                | 11635           | 254.5                   | (Wei et al., 2016)                                                          |
| DA010                              | Guaiacol                                     | C <sub>7</sub> H <sub>8</sub> O <sub>2</sub>   | 460             | 124.14                  | (Wei et al., 2016)                                                          |
| DA011                              | Isobutanal                                   | C <sub>4</sub> H <sub>8</sub> O                | 6561            | 72.11                   | (Wei et al., 2016)                                                          |
| DA012                              | 4-Hydroxy-3-butylphthalide                   | C <sub>12</sub> H <sub>14</sub> O <sub>3</sub> | 275561394       | 206.24                  | (Wei et al., 2016)                                                          |
| DA013                              | M-ethylphenol                                | C <sub>8</sub> H <sub>10</sub> O               | 12101           | 122.16                  | (Wei et al., 2016)                                                          |
| DA014                              | 2-Methylbutanal                              | C <sub>5</sub> H <sub>10</sub> O               | 7284            | 86.13                   | (Wei et al., 2016)                                                          |
| DA015                              | 3-Methylbutanal                              | C <sub>5</sub> H <sub>10</sub> O               | 11552           | 86.13                   | (Wei et al., 2016)                                                          |
| DA016                              | O-cresol                                     | C <sub>7</sub> H <sub>8</sub> O                | 335             | 108.14                  | (Wei et al., 2016)                                                          |
| DA017                              | β-Ocimene                                    | C <sub>10</sub> H <sub>16</sub>                | 5281553         | 136.23                  | (Li et al., 2016; Liu et al., 2016; X. Wang et al., 2018; Wei et al., 2016) |

| No.   | Derivatives and Constituents   | Molecular Formula                                | PubChem CID/SID | Molecule Weight (g/mol) | References                                                                           |
|-------|--------------------------------|--------------------------------------------------|-----------------|-------------------------|--------------------------------------------------------------------------------------|
| DA018 | Tridecane                      | C <sub>13</sub> H <sub>28</sub>                  | 12388           | 184.36                  | (X. Wang et al., 2018; Wei et al., 2016)                                             |
| DA019 | Decanal                        | C <sub>10</sub> H <sub>20</sub> O                | 8175            | 156.26                  | (Li et al., 2016; Pei et al., 2017; Wei et al., 2016)                                |
| DA020 | 1,3,5-Undecatriene             | C <sub>11</sub> H <sub>18</sub>                  | 5367412         | 150.26                  | (Wei et al., 2016)                                                                   |
| DA021 | 3,3'-Z-6.7',7.6'-Diligustilide | C <sub>24</sub> H <sub>28</sub> O <sub>4</sub>   | NR #            | 380.48                  | (Wei et al., 2016)                                                                   |
| DA022 | 1-Acetyl-β-carboline           | C <sub>13</sub> H <sub>10</sub> N <sub>2</sub> O | 638667          | 210.23                  | (Wei et al., 2016)                                                                   |
| DA023 | Bergamiol                      | C <sub>12</sub> H <sub>20</sub> O <sub>2</sub>   | 8294            | 196.29                  | (Wei et al., 2016)                                                                   |
| DA024 | 5-Methylfurfural               | C <sub>6</sub> H <sub>6</sub> O <sub>2</sub>     | 12097           | 110.11                  | (Wei et al., 2016)                                                                   |
| DA025 | D-Limonene                     | C <sub>10</sub> H <sub>16</sub>                  | 440917          | 136.23                  | (Pei et al., 2017; Wei et al., 2016)                                                 |
| DA026 | α-Phellandrene                 | C <sub>10</sub> H <sub>16</sub>                  | 7460            | 136.23                  | (Wei et al., 2016)                                                                   |
| DA027 | Spinasterol                    | C <sub>29</sub> H <sub>48</sub> O                | 5281331         | 412.7                   | (Wei et al., 2016; Wu et al., 2016; Xu, 2016; Zhu, 2018)                             |
| DA028 | Magnolol                       | C <sub>18</sub> H <sub>18</sub> O <sub>2</sub>   | 72300           | 266.3                   | (Wei et al., 2016; Xu, 2016)                                                         |
| DA029 | Baicalin                       | C <sub>21</sub> H <sub>18</sub> O <sub>11</sub>  | 64982           | 446.4                   | (Wei et al., 2016; Wu et al., 2016; Xu, 2016)                                        |
| DA030 | Octanal                        | C <sub>8</sub> H <sub>16</sub> O                 | 454             | 128.21                  | (Li et al., 2016; Pei et al., 2017; X. Wang et al., 2018; Wei et al., 2016)          |
| DA031 | δ-Guaiene                      | C <sub>15</sub> H <sub>24</sub>                  | 94275           | 204.35                  | (Li et al., 2016; X. Wang et al., 2018; Wei et al., 2016; Wu et al., 2016; Xu, 2016) |
| DA032 | 6-Undecanol                    | C <sub>11</sub> H <sub>24</sub> O                | 32045           | 172.31                  | (X. Wang et al., 2018; Wei et al., 2016)                                             |
| DA033 | Aromadendrene                  | C <sub>15</sub> H <sub>24</sub>                  | 91354           | 204.35                  | (Li et al., 2016; Wei et al., 2016)                                                  |
| DA034 | 1,10-Didenhydroaristolane      | C <sub>15</sub> H <sub>24</sub>                  | NR              | 204.35                  | (Wei et al., 2016)                                                                   |
| DA035 | Spathulenol                    | C <sub>15</sub> H <sub>24</sub> O                | 92231           | 220.35                  | (Li et al., 2016; X. Wang et al., 2018; Wei et al., 2016; M. Zhao et al., 2018)      |

| No.   | Derivatives and Constituents                                 | Molecular Formula                              | PubChem CID/SID | Molecule Weight (g/mol) | References                                                                      |
|-------|--------------------------------------------------------------|------------------------------------------------|-----------------|-------------------------|---------------------------------------------------------------------------------|
| DA036 | Caryophyllene                                                | C <sub>15</sub> H <sub>24</sub>                | 5281515         | 204.35                  | (Wei et al., 2016)                                                              |
| DA037 | β-Eudesmol                                                   | C <sub>15</sub> H <sub>26</sub> O              | 91457           | 222.37                  | (Wei et al., 2016)                                                              |
| DA038 | γ-Muurolene                                                  | C <sub>15</sub> H <sub>24</sub>                | 12313020        | 204.35                  | (Wei et al., 2016)                                                              |
| DA039 | α-Pinene                                                     | C <sub>10</sub> H <sub>16</sub>                | 6654            | 136.23                  | (Li et al., 2016; Liu et al., 2016; Pei et al., 2017; Wei et al., 2016)         |
| DA040 | Z, Z'-3.3'α,7α.7'α-Diligustilide                             | C <sub>24</sub> H <sub>28</sub> O <sub>4</sub> | NR #            | 380.48                  | (Wei et al., 2016)                                                              |
| DA041 | Myrcene                                                      | C <sub>10</sub> H <sub>16</sub>                | 31253           | 136.23                  | (Li et al., 2016; Pei et al., 2017; Wei et al., 2016)                           |
| DA042 | 3, 9-Dihydroxyligustilide                                    | C <sub>12</sub> H <sub>16</sub> O <sub>4</sub> | NR #            | 224.26                  | (Wei et al., 2016)                                                              |
| DA043 | 10-Angeloylbutylphthalide                                    | C <sub>17</sub> H <sub>20</sub> O <sub>4</sub> | 11572826        | 288.34                  | (Wei et al., 2016)                                                              |
| DA044 | Borneol                                                      | C <sub>10</sub> H <sub>18</sub> O              | 1201518         | 154.25                  | (Wei et al., 2016)                                                              |
| DA045 | Menthene-3-ol                                                | C <sub>10</sub> H <sub>18</sub> O              | NR              | 154.25                  | (Wei et al., 2016)                                                              |
| DA046 | 2-Methoxy-4-vinylphenol                                      | C <sub>9</sub> H <sub>10</sub> O <sub>2</sub>  | 332             | 150.17                  | (Li et al., 2016; Pei et al., 2017; X. Wang et al., 2018; Wei et al., 2016)     |
| DA047 | Copaene                                                      | C <sub>15</sub> H <sub>24</sub>                | 19725           | 204.35                  | (Wei et al., 2016)                                                              |
| DA048 | Octahydro-3,8,8-trimethyl-6-methylene-1H,3A,7-methanoazulene | NR                                             | NR              | NR                      | (Wei et al., 2016)                                                              |
| DA049 | 2-santalene                                                  | NR                                             | NR              | NR                      | (Wei et al., 2016)                                                              |
| DA050 | β-chamigrene                                                 | C <sub>15</sub> H <sub>24</sub>                | 442353          | 204.35                  | (Li et al., 2016; X. Wang et al., 2018; Wei et al., 2016; M. Zhao et al., 2018) |
| DA051 | 1,5,5-Trimethyl-6-methylene-cyclohexene                      | C <sub>10</sub> H <sub>16</sub>                | 578237          | 136.23                  | (Pei et al., 2017; X. Wang et al., 2018)                                        |
| DA052 | 2,4,5-trimethylbenzaldehyde                                  | C <sub>10</sub> H <sub>12</sub> O              | 22013           | 148.2                   | (Li et al., 2016; Pei et al., 2017; X. Wang et al., 2018)                       |
| DA053 | 2,4-dimethylbenzaldehyde                                     | C <sub>10</sub> H <sub>8</sub>                 | 61814           | 134.17                  | (Li et al., 2016; Pei et al., 2017)                                             |
| DA054 | (-)-alloaromadendrene                                        | C <sub>15</sub> H <sub>24</sub>                | 10899740        | 204.35                  | (Li et al., 2016; X. Wang et al., 2018)                                         |



| No.   | Derivatives and Constituents                | Molecular Formula                  | PubChem CID/SID | Molecule Weight (g/mol) | References                                                    |
|-------|---------------------------------------------|------------------------------------|-----------------|-------------------------|---------------------------------------------------------------|
| DA055 | (-)-Thujopsene                              | C <sub>15</sub> H <sub>24</sub>    | 442402          | 204.35                  | (Li et al., 2016; X. Wang et al., 2018; M. Zhao et al., 2018) |
| DA056 | α-Chamigrene                                | C <sub>15</sub> H <sub>24</sub>    | 442351          | 204.35                  | (Li et al., 2016)                                             |
| DA057 | Cuparene                                    | C <sub>15</sub> H <sub>22</sub>    | 86895           | 202.33                  | (Li et al., 2016; X. Wang et al., 2018; M. Zhao et al., 2018) |
| DA058 | β-Farnesene                                 | C <sub>15</sub> H <sub>24</sub>    | 5281517         | 204.35                  | (Li et al., 2016; Pei et al., 2017; X. Wang et al., 2018)     |
| DA059 | Allo-ocimene                                | C <sub>10</sub> H <sub>16</sub>    | 5368821         | 136.23                  | (Li et al., 2016; Pei et al., 2017; X. Wang et al., 2018)     |
| DA060 | Bicyclogermacrene                           | C <sub>15</sub> H <sub>24</sub>    | 13894537        | 204.35                  | (X. Wang et al., 2018)                                        |
| DA061 | Cis-α-bisabolene                            | C <sub>15</sub> H <sub>24</sub>    | 5352653         | 204.35                  | (X. Wang et al., 2018)                                        |
| DA062 | β-Bisabolene                                | C <sub>15</sub> H <sub>24</sub>    | 10104370        | 204.35                  | (Li et al., 2016; X. Wang et al., 2018)                       |
| DA063 | 4-Allyloxyimino-2-carene                    | C <sub>13</sub> H <sub>19</sub> NO | 9603708         | 205.3                   | (Liu et al., 2016)                                            |
| DA064 | β-Cedrene                                   | C <sub>15</sub> H <sub>24</sub>    | 11106485        | 204.35                  | (Li et al., 2016; Pei et al., 2017; X. Wang et al., 2018)     |
| DA065 | 6-Butyl-1,4-cycloheptadiene                 | C <sub>11</sub> H <sub>18</sub>    | 556470          | 136.23                  | (Li et al., 2016; Pei et al., 2017)                           |
| DA066 | 1,3,5,5-Tetramethyl-1,3-cyclohexadiene      | C <sub>10</sub> H <sub>16</sub>    | 78453           | 136.23                  | (Liu et al., 2016)                                            |
| DA067 | 1,5,5,6-Tetramethyl-1,3-cyclohexadiene      | C <sub>10</sub> H <sub>16</sub>    | 10581           | 136.23                  | (X. Wang et al., 2018; M. Zhao et al., 2018)                  |
| DA068 | 1,3-diisopropenyl-6-methyl-cyclohexene      | C <sub>13</sub> H <sub>20</sub>    | 577052          | 176.3                   | (Pei et al., 2017)                                            |
| DA069 | 4-Methyl-1-(prop-1-en-2-yl) cyclohexene     | NR                                 | NR              | NR                      | (Liu et al., 2016)                                            |
| DA070 | 4-Methyl-3-(1-methylethylidene)-cyclohexene | C <sub>10</sub> H <sub>16</sub>    | 564722          | 136.23                  | (Pei et al., 2017)                                            |
| DA071 | 1,2-Cyclooctadiene                          | C <sub>8</sub> H <sub>12</sub>     | 572661          | 108.18                  | (Liu et al., 2016)                                            |
| DA072 | 1-Decene                                    | C <sub>10</sub> H <sub>20</sub>    | 13381           | 140.27                  | (Pei et al., 2017; X. Wang et al., 2018)                      |
| DA073 | 5-Methyl-2-decene                           | C <sub>11</sub> H <sub>22</sub>    | 22171977        | 154.29                  | (Pei et al., 2017)                                            |
| DA074 | γ-Elemene                                   | C <sub>15</sub> H <sub>24</sub>    | 6432312         | 204.35                  | (Li et al., 2016; X. Wang et al., 2018)                       |
| DA075 | Elixene                                     | C <sub>15</sub> H <sub>24</sub>    | 275390917       | 204.35                  | (Li et al., 2016)                                             |
| DA076 | 1-Hexadecene                                | C <sub>16</sub> H <sub>32</sub>    | 12395           | 224.42                  | (Pei et al., 2017)                                            |

| No.   | Derivatives and Constituents                                  | Molecular Formula                               | PubChem CID/SID | Molecule Weight (g/mol) | References                                                                      |
|-------|---------------------------------------------------------------|-------------------------------------------------|-----------------|-------------------------|---------------------------------------------------------------------------------|
| DA077 | 5-Methyl-3-(1-methylethylidene)-1, 4-hexadiene                | C <sub>10</sub> H <sub>16</sub>                 | 578220          | 136.23                  | (Pei et al., 2017)                                                              |
| DA078 | β-Himachalene                                                 | C <sub>15</sub> H <sub>24</sub>                 | 15095           | 204.35                  | (Li et al., 2016; Pei et al., 2017; X. Wang et al., 2018; M. Zhao et al., 2018) |
| DA079 | α-Himachalene                                                 | C <sub>15</sub> H <sub>24</sub>                 | 11830551        | 204.35                  | (Li et al., 2016)                                                               |
| DA080 | Ledene                                                        | C <sub>15</sub> H <sub>24</sub>                 | 10910653        | 204.35                  | (Li et al., 2016; Pei et al., 2017)                                             |
| DA081 | Leucine                                                       | C <sub>6</sub> H <sub>13</sub> NO <sub>2</sub>  | 6106            | 131.17                  | (Li et al., 2017; S. Zhu et al., 2017)                                          |
| DA082 | Limonene                                                      | C <sub>10</sub> H <sub>16</sub>                 | 22311           | 136.23                  | (Li et al., 2016; X. Wang et al., 2018)                                         |
| DA083 | D-longifolene                                                 | C <sub>15</sub> H <sub>24</sub>                 | 1796220         | 204.35                  | (M. Zhao et al., 2018)                                                          |
| DA084 | Isolongifolene                                                | C <sub>15</sub> H <sub>24</sub>                 | 11127402        | 204.35                  | (Li et al., 2016)                                                               |
| DA085 | Longipinene                                                   | C <sub>15</sub> H <sub>24</sub>                 | 16217635        | 204.35                  | (Li et al., 2016; Pei et al., 2017; M. Zhao et al., 2018)                       |
| DA086 | 2,6,6-trimethylbicyclo-[3.1.1]hept-2-ene                      | C <sub>10</sub> H <sub>16</sub>                 | NR              | 136.23                  | (Pei et al., 2017)                                                              |
| DA087 | 5-Ethylidene-2-norbornene                                     | C <sub>9</sub> H <sub>12</sub>                  | 27756           | 120.19                  | (Liu et al., 2016)                                                              |
| DA088 | 3,7-Dimethyl-1,3,7-octatriene                                 | C <sub>10</sub> H <sub>16</sub>                 | 5320249         | 136.23                  | (Pei et al., 2017)                                                              |
| DA089 | β-Pinene                                                      | C <sub>10</sub> H <sub>16</sub>                 | 14896           | 136.23                  | (Li et al., 2016; X. Wang et al., 2018)                                         |
| DA090 | Sabinene                                                      | C <sub>10</sub> H <sub>16</sub>                 | 18818           | 136.23                  | (Li et al., 2016)                                                               |
| DA091 | γ-Terpinene                                                   | C <sub>10</sub> H <sub>16</sub>                 | 7461            | 136.23                  | (Li et al., 2016; X. Wang et al., 2018)                                         |
| DA092 | 1-Pentadecene                                                 | C <sub>15</sub> H <sub>30</sub>                 | 25913           | 210.4                   | (X. Wang et al., 2018)                                                          |
| DA093 | 1-(Methylpropyl)-4-(1',1',2'-trichloro-3'-ethylallyl) benzene | C <sub>15</sub> H <sub>22</sub> Cl <sub>3</sub> | 5373097         | 305.7                   | (X. Wang et al., 2018)                                                          |
| DA094 | 1-methoxy-4-[1-propenyl]-benzene                              | C <sub>10</sub> H <sub>12</sub> O               | NR              | 148.21                  | (Pei et al., 2017)                                                              |
| DA095 | Ethylbenzene                                                  | C <sub>8</sub> H <sub>10</sub>                  | 7500            | 106.16                  | (Li et al., 2016)                                                               |
| DA096 | Methylbenzene                                                 | C <sub>7</sub> H <sub>8</sub>                   | 1140            | 92.14                   | (Li et al., 2016)                                                               |
| DA097 | Pentylbenzene                                                 | C <sub>11</sub> H <sub>16</sub>                 | 10864           | 148.24                  | (Li et al., 2016; Pei et al., 2017)                                             |
| DA098 | P-xylene                                                      | C <sub>8</sub> H <sub>10</sub>                  | 7809            | 106.16                  | (Li et al., 2016)                                                               |
| DA099 | Squalene                                                      | C <sub>30</sub> H <sub>50</sub>                 | 638072          | 410.7                   | (X. Wang et al., 2018)                                                          |

| No.   | Derivatives and Constituents                 | Molecular Formula                                 | PubChem CID/SID | Molecule Weight (g/mol) | References                                   |
|-------|----------------------------------------------|---------------------------------------------------|-----------------|-------------------------|----------------------------------------------|
| DA100 | Styrene                                      | C <sub>8</sub> H <sub>8</sub>                     | 7501            | 104.15                  | (Li et al., 2016)                            |
| DA101 | Hexanoic acid, 2-butenyl ester               | C <sub>10</sub> H <sub>18</sub> O <sub>2</sub>    | 5369196         | 170.25                  | (Pei et al., 2017)                           |
| DA102 | Ethyl butyrate                               | C <sub>6</sub> H <sub>12</sub> O <sub>2</sub>     | 7762            | 116.16                  | (Liu et al., 2016)                           |
| DA103 | Hexadecanoic acid, trimethylsilyl ester      | C <sub>19</sub> H <sub>40</sub> O <sub>2</sub> Si | 521638          | 328.6                   | (X. Wang et al., 2018)                       |
| DA104 | Hexadecanoic acid, butyl ester               | C <sub>20</sub> H <sub>40</sub> O <sub>2</sub>    | 8090            | 312.5                   | (X. Wang et al., 2018)                       |
| DA105 | Hydratropic acid                             | C <sub>9</sub> H <sub>10</sub> O <sub>2</sub>     | 10296           | 150.17                  | (Liu et al., 2016)                           |
| DA106 | Stearic acid                                 | C <sub>18</sub> H <sub>36</sub> O <sub>2</sub>    | 5281            | 284.5                   | (L. Wang et al., 2016; X. Wang et al., 2018) |
| DA107 | Stearolic acid                               | C <sub>18</sub> H <sub>32</sub> O <sub>2</sub>    | 68167           | 280.4                   | (Pei et al., 2017)                           |
| DA108 | Tetradecanoic acid                           | C <sub>14</sub> H <sub>28</sub> O <sub>2</sub>    | 11005           | 228.37                  | (Pei et al., 2017)                           |
| DA109 | Trans-2-hexen-1-yl ester, phenylacetic acid  | C <sub>14</sub> H <sub>18</sub> O <sub>2</sub>    | 5368236         | 218.29                  | (Pei et al., 2017)                           |
| DA110 | (-)-4-terpineol                              | C <sub>10</sub> H <sub>18</sub> O                 | 5325830         | 154.25                  | (Pei et al., 2017)                           |
| DA111 | (-)- $\alpha$ -Terpineol                     | C <sub>10</sub> H <sub>18</sub> O                 | 443162          | 154.25                  | (Pei et al., 2017; X. Wang et al., 2018)     |
| DA112 | (6-hydroxymethyl-2,3-dimethylphenyl)methanol | C <sub>10</sub> H <sub>14</sub> O <sub>2</sub>    | 590603          | 166.22                  | (Pei et al., 2017)                           |
| DA113 | [Z]-2-[3-cyclopropyl-7-norcaranyl]acetate    | C <sub>13</sub> H <sub>20</sub> O <sub>2</sub>    | NR              | 208.3                   | (Pei et al., 2017)                           |
| DA114 | 10-Undecenal                                 | C <sub>11</sub> H <sub>20</sub> O                 | 8187            | 168.28                  | (Pei et al., 2017)                           |
| DA115 | 1H-Benzimidazol-2-amine                      | C <sub>7</sub> H <sub>7</sub> N <sub>3</sub>      | 13624           | 133.15                  | (Liu et al., 2016)                           |
| DA116 | 1-Tridecyn-4-ol                              | C <sub>13</sub> H <sub>24</sub> O                 | 557899          | 196.33                  | (Pei et al., 2017)                           |
| DA117 | 2,5-dimethyl-3-hexanol acetate               | C <sub>10</sub> H <sub>20</sub> O <sub>2</sub>    | 537590          | 172.26                  | (Pei et al., 2017)                           |
| DA118 | 2,9-Dimethyldecane                           | C <sub>12</sub> H <sub>26</sub>                   | 517733          | 170.34                  | (Pei et al., 2017)                           |
| DA119 | 2-Methoxy-(4'-hydroxyphenyl)ethanol          | C <sub>9</sub> H <sub>12</sub> O <sub>3</sub>     | NR #            | 168.19                  | (Wei, 2016)                                  |
| DA120 | 2-Methyldodecane                             | C <sub>13</sub> H <sub>28</sub>                   | 15270           | 184.36                  | (Pei et al., 2017)                           |
| DA121 | Dodecane                                     | C <sub>12</sub> H <sub>26</sub>                   | 8182            | 170.33                  | (X. Wang et al., 2018)                       |
| DA122 | 2-Methylnonane                               | C <sub>10</sub> H <sub>22</sub>                   | 13379           | 142.28                  | (Pei et al., 2017)                           |
| DA123 | 2-Propylphenol                               | C <sub>9</sub> H <sub>12</sub> O                  | 12570           | 125.70                  | (Zhu, 2018)                                  |
| DA124 | 2-Octanal                                    | C <sub>10</sub> H <sub>16</sub>                   | NR              | 136.24                  | (Pei et al., 2017)                           |
| DA125 | 3,4-Dimethylbenzaldehyde                     | C <sub>9</sub> H <sub>10</sub> O                  | 22278           | 134.17                  | (Pei et al., 2017)                           |
| DA126 | 4-Methyl-2-tert-octylphenol                  | C <sub>15</sub> H <sub>24</sub> O                 | 521263          | 220.35                  | (Pei et al., 2017)                           |
| DA127 | 4-Methyl-5-decanol                           | C <sub>11</sub> H <sub>24</sub> O                 | 557858          | 172.31                  | (Pei et al., 2017)                           |

| No.   | Derivatives and Constituents                                                     | Molecular Formula                              | PubChem CID/SID | Molecule Weight (g/mol) | References                               |
|-------|----------------------------------------------------------------------------------|------------------------------------------------|-----------------|-------------------------|------------------------------------------|
| DA128 | 5,6-dihydro-4-[2,3-dimethyl-2-buten-4-yl]-2H-pyran-2-one                         | C <sub>11</sub> H <sub>16</sub> O <sub>2</sub> | 535261          | 180.24                  | (Pei et al., 2017)                       |
| DA129 | 5,9,9-Trimethyl-spiro[3.5]non-5-en-1-one                                         | C <sub>12</sub> H <sub>18</sub> O              | 578422          | 178.27                  | (Pei et al., 2017)                       |
| DA130 | 5-Decen-1-ol                                                                     | C <sub>10</sub> H <sub>20</sub> O              | 5283292         | 156.26                  | (Pei et al., 2017)                       |
| DA131 | 5-Formyl-2,4-dimethyl-pyrrole-3-carbonitrile                                     | C <sub>8</sub> H <sub>8</sub> N <sub>2</sub> O | NR              | 148.16                  | (Liu et al., 2016)                       |
| DA132 | 6,7-dimethylbicyclo[4.2.0]octane                                                 | C <sub>10</sub> H <sub>18</sub>                | NR              | 138.25                  | (Pei et al., 2017)                       |
| DA133 | Oleyl alcohol                                                                    | C <sub>18</sub> H <sub>36</sub> O              | 5284499         | 268.5                   | (X. Wang et al., 2018)                   |
| DA134 | Benzaldehyde                                                                     | C <sub>7</sub> H <sub>6</sub> O                | 240             | 106.12                  | (Li et al., 2016)                        |
| DA135 | Butylicene phthalide                                                             | C <sub>12</sub> H <sub>12</sub> O <sub>2</sub> | NR              | 188.23                  | (Pei et al., 2017)                       |
| DA136 | Butyl-linolenate                                                                 | C <sub>22</sub> H <sub>38</sub> O <sub>2</sub> | 20833774        | 334.5                   | (X. Wang et al., 2018)                   |
| DA137 | Calarene                                                                         | C <sub>15</sub> H <sub>24</sub>                | 28481           | 204.35                  | (Li et al., 2016)                        |
| DA138 | Campesterol                                                                      | C <sub>28</sub> H <sub>48</sub> O              | 173183          | 400.7                   | (X. Wang et al., 2018)                   |
| DA139 | Carvacrol                                                                        | C <sub>10</sub> H <sub>14</sub> O              | 10364           | 150.22                  | (Pei et al., 2017)                       |
| DA140 | Carveol                                                                          | C <sub>10</sub> H <sub>16</sub> O              | 7438            | 152.23                  | (Li et al., 2016)                        |
| DA141 | Cis-7-tetradecen-1-ol                                                            | C <sub>14</sub> H <sub>28</sub> O              | 5362795         | 212.37                  | (Pei et al., 2017)                       |
| DA142 | Cis-Z,Z'-3 $\alpha$ ,7 $\alpha'$ ,7 $\alpha$ ,3 $\alpha'$ -dihydroxyiligustilide | NR                                             | NR              | NR                      | (Li et al., 2017)                        |
| DA143 | Dodecanal                                                                        | C <sub>12</sub> H <sub>24</sub> O              | 8194            | 184.32                  | (Pei et al., 2017; X. Wang et al., 2018) |
| DA144 | Dodecyloxirane                                                                   | C <sub>14</sub> H <sub>28</sub> O              | 18604           | 212.37                  | (Pei et al., 2017)                       |
| DA145 | E-10-pentadecenol                                                                | C <sub>15</sub> H <sub>30</sub> O              | 5364466         | 226.4                   | (Pei et al., 2017)                       |
| DA146 | E-7-tetradecen-1-ol                                                              | C <sub>14</sub> H <sub>28</sub> O              | 5362726         | 212.37                  | (Pei et al., 2017)                       |
| DA147 | Eicosane                                                                         | C <sub>20</sub> H <sub>42</sub>                | 8222            | 282.5                   | (X. Wang et al., 2018)                   |
| DA148 | Espatulenol                                                                      | C <sub>15</sub> H <sub>24</sub> O              | 6432640         | 220.35                  | (X. Wang et al., 2018)                   |
| DA149 | Heptane                                                                          | C <sub>7</sub> H <sub>16</sub>                 | 8900            | 100.2                   | (Pei et al., 2017)                       |
| DA150 | Hexadecene                                                                       | C <sub>16</sub> H <sub>32</sub>                | NR              | 224.42                  | (X. Wang et al., 2018)                   |
| DA151 | Iso-butylicene phthalide                                                         | C <sub>12</sub> H <sub>12</sub> O <sub>2</sub> | NR              | 188.23                  | (Pei et al., 2017)                       |
| DA152 | Methyl linoleate                                                                 | C <sub>19</sub> H <sub>34</sub> O <sub>2</sub> | 5284421         | 294.5                   | (X. Wang et al., 2018; Zhu, 2018)        |
| DA153 | Methyl linolenate                                                                | C <sub>19</sub> H <sub>32</sub> O <sub>2</sub> | 5319706         | 292.5                   | (X. Wang et al., 2018)                   |
| DA154 | Methyl palmitate                                                                 | C <sub>17</sub> H <sub>34</sub> O <sub>2</sub> | 8181            | 270.5                   | (X. Wang et al., 2018)                   |
| DA155 | N-Hexyl alcohol                                                                  | C <sub>6</sub> H <sub>14</sub> O               | 8103            | 102.17                  | (Li et al., 2016)                        |

| No.   | Derivatives and Constituents                         | Molecular Formula                              | PubChem CID/SID | Molecule Weight (g/mol) | References                                   |
|-------|------------------------------------------------------|------------------------------------------------|-----------------|-------------------------|----------------------------------------------|
| DA156 | Nonanal                                              | C <sub>9</sub> H <sub>18</sub> O               | 31289           | 142.24                  | (Li et al., 2016)                            |
| DA157 | Nonane                                               | C <sub>9</sub> H <sub>20</sub>                 | 8141            | 128.25                  | (Pei et al., 2017)                           |
| DA158 | Octane                                               | C <sub>8</sub> H <sub>18</sub>                 | 356             | 114.23                  | (Pei et al., 2017)                           |
| DA159 | Patchouli alcohol                                    | C <sub>15</sub> H <sub>26</sub> O              | 10955174        | 222.37                  | (Pei et al., 2017)                           |
| DA160 | Palustrol                                            | C <sub>15</sub> H <sub>26</sub> O              | 110745          | 222.37                  | (X. Wang et al., 2018)                       |
| DA161 | 1-Pentadecanol                                       | C <sub>15</sub> H <sub>32</sub> O              | 12397           | 228.41                  | (X. Wang et al., 2018)                       |
| DA162 | Stigmasterol                                         | C <sub>29</sub> H <sub>48</sub> O              | 5280794         | 412.7                   | (X. Wang et al., 2018)                       |
| DA163 | N-Tetradecane                                        | C <sub>14</sub> H <sub>30</sub>                | 12389           | 198.39                  | (X. Wang et al., 2018)                       |
| DA164 | Trans,trans-2,4-Hexadienyl acetate                   | C <sub>8</sub> H <sub>12</sub> O <sub>2</sub>  | 5363491         | 140.18                  | (Pei et al., 2017)                           |
| DA165 | 2-Undecanone                                         | C <sub>11</sub> H <sub>22</sub> O              | 8163            | 170.29                  | (X. Wang et al., 2018)                       |
| DA166 | β-Elementone                                         | C <sub>15</sub> H <sub>22</sub> O              | 10955018        | 218.33                  | (Liu et al., 2016)                           |
| DA167 | 2-(1-oxypropyl)-benzoic acid methyl ester            | C <sub>13</sub> H <sub>16</sub> O <sub>3</sub> | NR              | 220.27                  | (L. Wang et al., 2016)                       |
| DA168 | 1,2-Xylene                                           | C <sub>8</sub> H <sub>10</sub>                 | 7237            | 106.16                  | (Li et al., 2016)                            |
| DA169 | p-cymene                                             | C <sub>10</sub> H <sub>14</sub>                | 7463            | 134.22                  | (Li et al., 2016)                            |
| DA170 | 2,2'-Methylenebis(4-methyl-6-tert-butylphenol)       | C <sub>23</sub> H <sub>32</sub> O <sub>2</sub> | 8398            | 340.5                   | (X. Wang et al., 2018)                       |
| DA171 | Tropone                                              | C <sub>7</sub> H <sub>6</sub> O                | 10881           | 106.12                  | (X. Wang et al., 2018)                       |
| DA172 | 4-Octanone                                           | C <sub>8</sub> H <sub>16</sub> O               | 11516           | 128.21                  | (Li et al., 2016)                            |
| DA173 | 2-Nonanone                                           | C <sub>9</sub> H <sub>18</sub> O               | 13187           | 142.24                  | (Li et al., 2016)                            |
| DA174 | 1,13-Tetradecadiene                                  | C <sub>14</sub> H <sub>26</sub>                | 30875           | 194.36                  | (X. Wang et al., 2018)                       |
| DA175 | 5-Acetoxyethylfurfural                               | C <sub>8</sub> H <sub>8</sub> O <sub>4</sub>   | 66349           | 168.15                  | (Wu et al., 2016; Xu, 2016)                  |
| DA176 | 2,6,6-Trimethylbicyclo[3,1,1]hept-2-ene              | C <sub>16</sub> H <sub>22</sub> O              | NR #            | 230.34                  | (M. Zhao et al., 2018)                       |
| DA177 | 5-Hydroxyethylfurfural                               | C <sub>6</sub> H <sub>6</sub> O <sub>3</sub>   | 237332          | 126.11                  | (Wu et al., 2016; Xu, 2016)                  |
| DA178 | Nonylcyclopropane                                    | C <sub>12</sub> H <sub>24</sub>                | 522556          | 168.32                  | (X. Wang et al., 2018)                       |
| DA179 | 10,13-Octadecadienoic acid methyl ester              | C <sub>19</sub> H <sub>34</sub> O <sub>2</sub> | 549045          | 294.5                   | (X. Wang et al., 2018)                       |
| DA180 | (E,Z)-Alloocimene                                    | C <sub>10</sub> H <sub>16</sub>                | 5462627         | 136.23                  | (X. Wang et al., 2018)                       |
| DA181 | (Z)-4-propenyl-2-methoxyphenol                       | C <sub>10</sub> H <sub>12</sub> O <sub>2</sub> | NR              | 164.2                   | (X. Wang et al., 2018)                       |
| DA182 | Trans-2-nonenal                                      | C <sub>9</sub> H <sub>16</sub> O               | 5283335         | 140.22                  | (Li et al., 2016)                            |
| DA183 | 2-Methoxy-2-(4'-Hydroxyphenyl)ethanol                | C <sub>9</sub> H <sub>12</sub> O <sub>3</sub>  | 22297411        | 168.19                  | (Wu et al., 2016)                            |
| DA184 | Cyclohexene, 3-(1,5-dimethyl-4-hexenyl)-6-methylene- | C <sub>15</sub> H <sub>24</sub>                | 519764          | 204.35                  | (X. Wang et al., 2018; M. Zhao et al., 2018) |
| DA185 | Cyclopropane, trimethyl(2-methyl-1-propenylidene)-   | C <sub>10</sub> H <sub>16</sub>                | 139833          | 136.23                  | (X. Wang et al., 2018)                       |

| No.   | Derivatives and Constituents                                                         | Molecular Formula                                | PubChem CID/SID | Molecule Weight (g/mol) | References                                              |
|-------|--------------------------------------------------------------------------------------|--------------------------------------------------|-----------------|-------------------------|---------------------------------------------------------|
| DA186 | Cyclohexane, 1-methylene-4-(1-methylethenyl)-                                        | C <sub>10</sub> H <sub>16</sub>                  | 68140           | 136.23                  | (X. Wang et al., 2018)                                  |
| DA187 | 1,3,6-Octatriene, 3,7-dimethyl-, (E)-                                                | C <sub>10</sub> H <sub>16</sub>                  | NR              | 136.23                  | (M. Zhao et al., 2018)                                  |
| DA188 | 6,6-dimethyl-2-methylene-, (1S)-Bicyclo(3.1.1)heptane                                | C <sub>10</sub> H <sub>16</sub>                  | 24848167        | 136.23                  | (M. Zhao et al., 2018)                                  |
| DA189 | 3'-methoxybenzotrile-(1',2'-b)-1,4-triethylenediamine                                | C <sub>11</sub> H <sub>14</sub> N <sub>2</sub> O | NR              | 190.25                  | (M. Zhao et al., 2018)                                  |
| DA190 | 1,5,6,7-Tetramethylbicyclo[3.2.0]hepta-2,6-diene                                     | C <sub>11</sub> H <sub>16</sub>                  | 583876          | 148.24                  | (M. Zhao et al., 2018)                                  |
| DA191 | 2(3H)-Benzofuranone, 4,5,6,7-tetramethyl-                                            | C <sub>12</sub> H <sub>14</sub> O <sub>2</sub>   | 595374          | 190.24                  | (M. Zhao et al., 2018)                                  |
| DA192 | Dihydrocoumarin, 5,7,8-trimethyl-                                                    | C <sub>12</sub> H <sub>14</sub> O <sub>2</sub>   | 605390          | 190.24                  | (M. Zhao et al., 2018)                                  |
| DA193 | Cyclohexane, 1-ethenyl-1-methyl-2-(1-methylethenyl)-4-(1-methylethylidene)-          | C <sub>15</sub> H <sub>24</sub>                  | 94254           | 204.35                  | (M. Zhao et al., 2018)                                  |
| DA194 | Cyclohexane, 1-ethylene-1-methyl-2-(1-methylethenyl)-4-(1R,2R)-(1-methylethylidene)- | C <sub>15</sub> H <sub>24</sub>                  | NR              | 204.35                  | (M. Zhao et al., 2018)                                  |
| DA195 | Cyclohexene, 3-(1,5-dimethyl-4-ethenyl)-6-methylene-[S-(R*,S*)]                      | C <sub>15</sub> H <sub>24</sub>                  | NR              | 204.35                  | (M. Zhao et al., 2018)                                  |
| DA196 | 6-Undecanone                                                                         | C <sub>11</sub> H <sub>22</sub> O                | 13561           | 170.29                  | (X. Wang et al., 2018)                                  |
| DA197 | 2-Hydroxy-2-(4'-ethoxyethyl)ethanol                                                  | NR                                               | NR              | NR                      | (Wu et al., 2016)                                       |
| DA198 | Di(2-ethylhexyl)phthalate                                                            | C <sub>24</sub> H <sub>38</sub> O <sub>4</sub>   | 8343            | 390.6                   | (X. Wang et al., 2018)                                  |
| DA199 | Ethyl linoleate                                                                      | C <sub>20</sub> H <sub>36</sub> O <sub>2</sub>   | 5282184         | 308.5                   | (X. Wang et al., 2018)                                  |
| DA200 | Propoxur                                                                             | C <sub>11</sub> H <sub>15</sub> NO <sub>3</sub>  | 4944            | 209.24                  | (X. Wang et al., 2018)                                  |
| DA201 | (3R,8S)-faltarindiol                                                                 | C <sub>17</sub> H <sub>24</sub> O <sub>2</sub>   | 5281148         | 260.399                 | (Li et al., 2017; Wu et al., 2016; Xu, 2016; Zhu, 2018) |
| DA202 | β-Sitosterol                                                                         | C <sub>29</sub> H <sub>50</sub> O                | 222284          | 414.7                   | (Ma et al., 2016; Wei, 2016; Zhu, 2018)                 |
| DA203 | γ-Sitosterol                                                                         | C <sub>29</sub> H <sub>50</sub> O                | 457801          | 414.7                   | (X. Wang et al., 2018)                                  |
| DA204 | 1-(3',4'-dihydroxycinnamoyl)-cyclopentane-2,3-diol                                   | NR                                               | NR              | NR                      | (Luo et al., 2017)                                      |
| DA205 | 4,10-Aromadendranediol                                                               | C <sub>15</sub> H <sub>26</sub> O <sub>2</sub>   | 14312736        | 238.37                  | (Zhu, 2018)                                             |
| DA206 | Benzyl alcohol                                                                       | C <sub>7</sub> H <sub>8</sub> O                  | 244             | 108.14                  | (Li et al., 2016)                                       |
| DA207 | Daucosterol                                                                          | C <sub>35</sub> H <sub>60</sub> O <sub>6</sub>   | 5742590         | 576.8                   | (Ma et al., 2016; Wei, 2016; Zhu, 2018)                 |
| DA208 | Globulol                                                                             | C <sub>15</sub> H <sub>26</sub> O                | 101716          | 222.37                  | (X. Wang et al., 2018)                                  |
| DA209 | 1-Pentanone, 1-phenyl-                                                               | C <sub>11</sub> H <sub>14</sub> O                | 66093           | 162.23                  | (Li et al., 2016)                                       |
| DA210 | Undecane                                                                             | C <sub>11</sub> H <sub>24</sub>                  | 14257           | 156.31                  | (X. Wang et al., 2018)                                  |

| No.       | Derivatives and Constituents                           | Molecular Formula                               | PubChem CID/SID | Molecule Weight (g/mol) | References                                                                                                                       |
|-----------|--------------------------------------------------------|-------------------------------------------------|-----------------|-------------------------|----------------------------------------------------------------------------------------------------------------------------------|
| DA211     | D-threo-guaiacylglycerol 8-O- $\beta$ -glucopyranoside | C <sub>16</sub> H <sub>24</sub> O <sub>10</sub> | NR #            | 376.36                  | (Wei, 2016)                                                                                                                      |
| DA212     | Hexanal                                                | C <sub>6</sub> H <sub>12</sub> O                | 6184            | 100.16                  | (Li et al., 2016)                                                                                                                |
| DA213     | Isophorone                                             | C <sub>9</sub> H <sub>14</sub> O                | 6544            | 138.21                  | (Li et al., 2016)                                                                                                                |
| DA214     | Vanillin                                               | C <sub>8</sub> H <sub>8</sub> O <sub>3</sub>    | 1183            | 152.15                  | (Wu et al., 2016; Xu, 2016; Zhu, 2018)                                                                                           |
| DA215     | P-cresol                                               | C <sub>7</sub> H <sub>8</sub> O                 | 2879            | 108.14                  | (Wu et al., 2016)                                                                                                                |
| DA216     | P-hydroxyacetophenone                                  | C <sub>8</sub> H <sub>8</sub> O <sub>2</sub>    | 7469            | 136.15                  | (Zhu, 2018)                                                                                                                      |
| <b>DB</b> | <b>Phthalides (n=39)</b>                               |                                                 |                 |                         |                                                                                                                                  |
| DB001     | Z-ligustilide                                          | C <sub>12</sub> H <sub>14</sub> O <sub>2</sub>  | 529865          | 190.24                  | (Li et al., 2017; Liu et al., 2016; Liu, 2018; L. Wang et al., 2016; X. Wang et al., 2018; Wei et al., 2016; C. Wu et al., 2018) |
| DB002     | E-ligustilide                                          | C <sub>12</sub> H <sub>14</sub> O <sub>2</sub>  | 5877292         | 190.24                  | (Liu et al., 2016; L. Wang et al., 2019; L. Wang et al., 2016; X. Wang et al., 2018; Wei et al., 2016)                           |
| DB003     | Z-butylidenephthalide                                  | C <sub>12</sub> H <sub>12</sub> O <sub>2</sub>  | 5352899         | 188.22                  | (Gong et al., 2016; L. Wang et al., 2016; Wei et al., 2016; M. Zhao et al., 2018)                                                |
| DB004     | E-butylidenephthalide                                  | C <sub>12</sub> H <sub>12</sub> O <sub>2</sub>  | 275559960       | 188.22                  | (Gong et al., 2016; L. Wang et al., 2016; Wei et al., 2016)                                                                      |
| DB005     | Butylphthalide                                         | C <sub>12</sub> H <sub>14</sub> O <sub>2</sub>  | 61361           | 190.24                  | (L. Wang et al., 2016; Wei et al., 2016; Wu et al., 2016; Xu, 2016)                                                              |
| DB006     | Senkyunolide A                                         | C <sub>12</sub> H <sub>16</sub> O <sub>2</sub>  | 3085257         | 192.25                  | (Ma et al., 2017; L. Wang et al., 2016; Wei et al., 2016)                                                                        |
| DB007     | Senkyunolide I                                         | C <sub>12</sub> H <sub>16</sub> O <sub>4</sub>  | 11521428        | 224.25                  | (Liu, 2018; Ma et al., 2017; Wei et al., 2016)                                                                                   |
| DB008     | Z-ligustilide dimer E-232                              | C <sub>24</sub> H <sub>28</sub> O <sub>4</sub>  | NR #            | 380.48                  | (Wei et al., 2016)                                                                                                               |

| No.   | Derivatives and Constituents | Molecular Formula                              | PubChem CID/SID | Molecule Weight (g/mol) | References                                                                                                                            |
|-------|------------------------------|------------------------------------------------|-----------------|-------------------------|---------------------------------------------------------------------------------------------------------------------------------------|
| DB009 | Senkyunolide H               | C <sub>12</sub> H <sub>16</sub> O <sub>4</sub> | 5321251         | 224.25                  | (Ma et al., 2017; Y. Wang et al., 2016; Wei et al., 2016; G. Wu et al., 2018)                                                         |
| DB010 | Senkyunolide P               | C <sub>24</sub> H <sub>30</sub> O <sub>4</sub> | 91731751        | 382.5                   | (Wei et al., 2016)                                                                                                                    |
| DB011 | Levistolide A                | C <sub>24</sub> H <sub>28</sub> O <sub>4</sub> | 70698035        | 380.5                   | (Y. Wang et al., 2016; Wei et al., 2016)                                                                                              |
| DB012 | Riligustilide                | C <sub>24</sub> H <sub>28</sub> O <sub>4</sub> | 6442656         | 380.5                   | (Gong et al., 2016; Wei et al., 2016)                                                                                                 |
| DB013 | Tokinolide B                 | C <sub>24</sub> H <sub>28</sub> O <sub>4</sub> | 11090206        | 380.5                   | (Y. Wang et al., 2016; Wei et al., 2016; Wu et al., 2016; Xu, 2016; Zhu, 2018)                                                        |
| DB014 | Neocnidilide                 | C <sub>12</sub> H <sub>18</sub> O <sub>2</sub> | 3083857         | 194.27                  | (Wei et al., 2016)                                                                                                                    |
| DB015 | Ansaspirolide                | C <sub>24</sub> H <sub>26</sub> O <sub>4</sub> | 44575265        | 378.5                   | (Wei et al., 2016)                                                                                                                    |
| DB016 | Z,Z'-6.8',7.3'-diligustilide | C <sub>24</sub> H <sub>28</sub> O <sub>4</sub> | NR #            | 380.48                  | (Wei et al., 2016)                                                                                                                    |
| DB017 | Angelicide                   | C <sub>24</sub> H <sub>28</sub> O <sub>4</sub> | 5316848         | 380.48                  | (Y. Wang et al., 2016; Wei et al., 2016)                                                                                              |
| DB018 | Z,Z'-3.3'8.8'-diligustilide  | C <sub>24</sub> H <sub>28</sub> O <sub>4</sub> | NR #            | 380.48                  | (Y. Wang et al., 2016; Wei et al., 2016)                                                                                              |
| DB019 | Senkyunolide F               | C <sub>12</sub> H <sub>14</sub> O <sub>3</sub> | NR #            | 206.24                  | (Y. Wang et al., 2016; Wei et al., 2016)                                                                                              |
| DB020 | Ligustilide dimer 1          | C <sub>24</sub> H <sub>28</sub> O <sub>4</sub> | NR              | 380.48                  | (X. Wang et al., 2018)                                                                                                                |
| DB021 | Ligustilide dimer 2          | C <sub>24</sub> H <sub>28</sub> O <sub>4</sub> | NR              | 380.48                  | (X. Wang et al., 2018)                                                                                                                |
| DB022 | Ligustilide dimer 3          | C <sub>24</sub> H <sub>28</sub> O <sub>4</sub> | NR              | 380.48                  | (X. Wang et al., 2018)                                                                                                                |
| DB023 | Ligustilide dimer 4          | C <sub>24</sub> H <sub>28</sub> O <sub>4</sub> | NR              | 380.48                  | (N. Wang et al., 2017; X. Wang et al., 2018)                                                                                          |
| DB024 | 3-Butylidenephthalide        | C <sub>12</sub> H <sub>12</sub> O <sub>2</sub> | 642376          | 188.22                  | (Li et al., 2017; Li et al., 2016; Liu et al., 2016; Ma et al., 2016; N. Wang et al., 2017; X. Wang et al., 2018; G. Wu et al., 2018) |
| DB025 | 3-N-butylphthalide           | C <sub>12</sub> H <sub>14</sub> O <sub>2</sub> | 61361           | 190.24                  | (Li et al., 2016; G. Wu et al., 2018)                                                                                                 |



| No.       | Derivatives and Constituents                 | Molecular Formula                              | PubChem CID/SID | Molecule Weight (g/mol) | References                                                                                                                                                                                                                      |
|-----------|----------------------------------------------|------------------------------------------------|-----------------|-------------------------|---------------------------------------------------------------------------------------------------------------------------------------------------------------------------------------------------------------------------------|
| DB026     | 3-Butylidene-7-hydroxyphthalide              | C <sub>12</sub> H <sub>12</sub> O <sub>3</sub> | 5281559         | 204.22                  | (L. Wang et al., 2019)                                                                                                                                                                                                          |
| DB027     | Bergapten                                    | C <sub>12</sub> H <sub>8</sub> O <sub>4</sub>  | 2355            | 216.19                  | (Jiang et al., 2019)                                                                                                                                                                                                            |
| DB028     | Senkyunolide E                               | C <sub>12</sub> H <sub>12</sub> O <sub>3</sub> | 11830530        | 204.22                  | (Y. Wang et al., 2016)                                                                                                                                                                                                          |
| DB029     | Senkyunolide G                               | C <sub>12</sub> H <sub>16</sub> O <sub>3</sub> | 10013283        | 208.25                  | (L. Wang et al., 2019)                                                                                                                                                                                                          |
| DB030     | Senkyunolide R                               | C <sub>12</sub> H <sub>16</sub> O <sub>5</sub> | 101686923       | 240.25                  | (Ma et al., 2016; Wei, 2016)                                                                                                                                                                                                    |
| DB031     | Senkyunolide S                               | C <sub>12</sub> H <sub>16</sub> O <sub>5</sub> | 101686926       | 240.25                  | (Ma et al., 2016; Wei, 2016)                                                                                                                                                                                                    |
| DB032     | Z, Z'-6,6',7,3α'-diligustilide               | C <sub>24</sub> H <sub>28</sub> O <sub>4</sub> | NR #            | 380.5                   | (Li et al., 2017; Zhu, 2018)                                                                                                                                                                                                    |
| DB033     | E-6,7-dihydroxydihydrologustilide            | C <sub>12</sub> H <sub>16</sub> O <sub>4</sub> | NR              | 224.26                  | (L. Wang et al., 2016)                                                                                                                                                                                                          |
| DB034     | Senkyunolide D                               | C <sub>12</sub> H <sub>14</sub> O <sub>4</sub> | NR #            | 222.24                  | (L. Wang et al., 2016)                                                                                                                                                                                                          |
| DB035     | Z-6,7-epoxyligustilide                       | C <sub>12</sub> H <sub>14</sub> O <sub>3</sub> | 5317139         | 206.24                  | (Liu, 2018; L. Wang et al., 2016)                                                                                                                                                                                               |
| DB036     | Cis-Z,Z'-3a, 7a',7a.3a'-dihydroxyligustilide | C <sub>24</sub> H <sub>28</sub> O <sub>4</sub> | NR #            | 380.48                  | (Gong et al., 2016)                                                                                                                                                                                                             |
| DB037     | Tokinolide A                                 | C <sub>12</sub> H <sub>14</sub> O <sub>2</sub> | NR #            | 190.24                  | (Gong et al., 2016)                                                                                                                                                                                                             |
| DB038     | Tokinolide C                                 | C <sub>24</sub> H <sub>32</sub> O <sub>3</sub> | NR #            | 368.52                  | (Gong et al., 2016)                                                                                                                                                                                                             |
| DB039     | 11-Angeloylsenkyunolide F                    |                                                | NR              |                         | (Liu, 2018)                                                                                                                                                                                                                     |
| <b>DC</b> | <b>Organic acids (n=26)</b>                  |                                                |                 |                         |                                                                                                                                                                                                                                 |
| DC001     | Protocatechuic acid                          | C <sub>7</sub> H <sub>6</sub> O <sub>4</sub>   | 72              | 154.12                  | (Wei et al., 2016)                                                                                                                                                                                                              |
| DC002     | Phthalic acid                                | C <sub>8</sub> H <sub>6</sub> O <sub>4</sub>   | 1017            | 166.13                  | (L. Wang et al., 2019; L. Wang et al., 2016; Wei et al., 2016)                                                                                                                                                                  |
| DC003     | P-hydroxybenzoic acid                        | C <sub>7</sub> H <sub>6</sub> O <sub>3</sub>   | 135             | 138.12                  | (Wei et al., 2016)                                                                                                                                                                                                              |
| DC004     | Vanillic acid                                | C <sub>8</sub> H <sub>8</sub> O <sub>4</sub>   | 8468            | 168.15                  | (L. Wang et al., 2019; L. Wang et al., 2016; Wei et al., 2016)                                                                                                                                                                  |
| DC005     | Ferulic acid                                 | C <sub>10</sub> H <sub>10</sub> O <sub>4</sub> | 445858          | 194.18                  | (Ding, 2016; Gao, 2016; Guan et al., 2018; Huang, 2017; Li et al., 2017; Ma et al., 2017; Pan et al., 2017; Su, 2019; Sun et al., 2019; N. Wang et al., 2017; Wei et al., 2016; G. Wu et al., 2018; Wu et al., 2016; Zhu, 2018) |

| No.       | Derivatives and Constituents                 | Molecular Formula                                             | PubChem CID/SID | Molecule Weight (g/mol) | References                                                         |
|-----------|----------------------------------------------|---------------------------------------------------------------|-----------------|-------------------------|--------------------------------------------------------------------|
| DC006     | Caffeic acid                                 | C <sub>9</sub> H <sub>8</sub> O <sub>4</sub>                  | 689043          | 180.16                  | (Guan et al., 2018; Wei et al., 2016)                              |
| DC007     | Folinic acid                                 | C <sub>20</sub> H <sub>23</sub> N <sub>7</sub> O <sub>7</sub> | 135403648       | 473.4                   | (Wei et al., 2016)                                                 |
| DC008     | Folic acid                                   | C <sub>19</sub> H <sub>19</sub> N <sub>7</sub> O <sub>6</sub> | 135398658       | 441.4                   | (Wei et al., 2016)                                                 |
| DC009     | Nicotinic acid                               | C <sub>6</sub> H <sub>5</sub> NO <sub>2</sub>                 | 938             | 123.11                  | (Wei et al., 2016)                                                 |
| DC010     | Succinic acid                                | C <sub>4</sub> H <sub>6</sub> O <sub>4</sub>                  | 1110            | 118.09                  | (Wei et al., 2016)                                                 |
| DC011     | Anisic acid                                  | C <sub>8</sub> H <sub>8</sub> O <sub>3</sub>                  | 7478            | 152.15                  | (Wei et al., 2016)                                                 |
| DC012     | Azelaic acid                                 | C <sub>9</sub> H <sub>16</sub> O <sub>4</sub>                 | 2266            | 188.22                  | (Wei et al., 2016)                                                 |
| DC013     | Palmitic acid                                | C <sub>16</sub> H <sub>32</sub> O <sub>2</sub>                | 985             | 256.43                  | (X. Wang et al., 2018; Wei et al., 2016)                           |
| DC014     | Lactic acid                                  | C <sub>3</sub> H <sub>6</sub> O <sub>3</sub>                  | 612             | 90.08                   | (Li et al., 2017)                                                  |
| DC015     | Acetic acid                                  | C <sub>2</sub> H <sub>4</sub> O <sub>2</sub>                  | 176             | 60.05                   | (Pei et al., 2017)                                                 |
| DC016     | Chlorogenic acid                             | C <sub>16</sub> H <sub>18</sub> O <sub>9</sub>                | 1794427         | 354.31                  | (L. Wang et al., 2019)                                             |
| DC017     | Citric acid                                  | C <sub>6</sub> H <sub>8</sub> O <sub>7</sub>                  | 311             | 192.12                  | (Li et al., 2017)                                                  |
| DC018     | Formic acid                                  | CH <sub>2</sub> O <sub>2</sub>                                | 284             | 46.025                  | (Li et al., 2017)                                                  |
| DC019     | Fumaric acid                                 | C <sub>4</sub> H <sub>4</sub> O <sub>4</sub>                  | 444972          | 116.07                  | (Li et al., 2017)                                                  |
| DC020     | Hexanoic acid                                | C <sub>6</sub> H <sub>12</sub> O <sub>2</sub>                 | 8892            | 116.16                  | (Li et al., 2016)                                                  |
| DC021     | Linoleic acid                                | C <sub>18</sub> H <sub>32</sub> O <sub>2</sub>                | 5280450         | 280.4                   | (L. Wang et al., 2019; L. Wang et al., 2016; X. Wang et al., 2018) |
| DC022     | Linolenic acid                               | C <sub>18</sub> H <sub>30</sub> O <sub>2</sub>                | 5280934         | 278.4                   | (J. Wang et al., 2016)                                             |
| DC023     | Octadecenoic acid                            | C <sub>18</sub> H <sub>34</sub> O <sub>2</sub>                | 172146          | 282.5                   | (J. Wang et al., 2016)                                             |
| DC024     | Cinnamic acid                                | C <sub>9</sub> H <sub>8</sub> O <sub>2</sub>                  | 444539          | 444539                  | (Zhu, 2018)                                                        |
| DC025     | 5-Caffeoylquinic acid                        | C <sub>16</sub> H <sub>18</sub> O <sub>9</sub>                | 12310830        | 354.3                   | (Wei, 2016)                                                        |
| DC026     | Phytic acid                                  | C <sub>6</sub> H <sub>18</sub> O <sub>24</sub> P <sub>6</sub> | 890             | 660.04                  | (Filipiak-Szok et al., 2016)                                       |
| <b>DD</b> | <b>Coumarins (n=14)</b>                      |                                                               |                 |                         |                                                                    |
| DD001     | 7H-Furo[3,2-g][1]benzopyran-7-one,9-hydroxy- | C <sub>11</sub> H <sub>6</sub> O <sub>4</sub>                 | 65090           | 202.16                  | (Jiang et al., 2019)                                               |
| DD002     | (+)-Marmesin                                 | C <sub>14</sub> H <sub>14</sub> O <sub>4</sub>                | 334704          | 246.26                  | (Jiang et al., 2019)                                               |
| DD003     | 7-Hydroxy-6-methoxycoumarin                  | C <sub>10</sub> H <sub>8</sub> O <sub>4</sub>                 | 5280460         | 192.17                  | (Zhu, 2018)                                                        |
| DD004     | 8-Methoxypsoralen                            | C <sub>12</sub> H <sub>8</sub> O <sub>4</sub>                 | 4114            | 216.19                  | (Jiang et al., 2019)                                               |
| DD005     | Imperatorin                                  | C <sub>16</sub> H <sub>14</sub> O <sub>4</sub>                | 10212           | 270.28                  | (Jiang et al., 2019)                                               |

| No.       | Derivatives and Constituents                         | Molecular Formula                                                            | PubChem CID/SID | Molecule Weight (g/mol) | References                                        |
|-----------|------------------------------------------------------|------------------------------------------------------------------------------|-----------------|-------------------------|---------------------------------------------------|
| DD006     | Alloisimperatorin                                    | C <sub>16</sub> H <sub>14</sub> O <sub>4</sub>                               | 5317436         | 270.28                  | (Jiang et al., 2019)                              |
| DD007     | Isoimperatorin                                       | C <sub>16</sub> H <sub>14</sub> O <sub>4</sub>                               | 68081           | 270.28                  | (Jiang et al., 2019; Xu, 2016)                    |
| DD008     | Isopimpinellin                                       | C <sub>13</sub> H <sub>10</sub> O <sub>5</sub>                               | 68079           | 246.21                  | (Jiang et al., 2019)                              |
| DD009     | Osthenol                                             | C <sub>14</sub> H <sub>14</sub> O <sub>3</sub>                               | 5320318         | 230.26                  | (Jiang et al., 2019)                              |
| DD010     | Oxypeucedanin                                        | C <sub>16</sub> H <sub>14</sub> O <sub>5</sub>                               | 160544          | 286.28                  | (Jiang et al., 2019)                              |
| DD011     | Pabulenol                                            | C <sub>16</sub> H <sub>14</sub> O <sub>5</sub>                               | 3009225         | 286.28                  | (Jiang et al., 2019)                              |
| DD012     | Phellopterin                                         | C <sub>17</sub> H <sub>16</sub> O <sub>5</sub>                               | 98608           | 300.3                   | (Jiang et al., 2019)                              |
| DD013     | Psoralen                                             | C <sub>11</sub> H <sub>6</sub> O <sub>3</sub>                                | 6199            | 186.16                  | (Jiang et al., 2019)                              |
| DD014     | Cnidilin                                             | C <sub>17</sub> H <sub>16</sub> O <sub>5</sub>                               | 821449          | 300.3                   | (Jiang et al., 2019)                              |
| <b>DE</b> | <b>Phospholipids (n=2)</b>                           |                                                                              |                 |                         |                                                   |
| DE001     | 1,2-di-O-hexadecanoyl-sn-glycero-3-phosphorylcholine | C <sub>40</sub> H <sub>80</sub> NO <sub>8</sub> P                            | NR #            | 734.05                  | (Ma et al., 2016; Wei, 2016)                      |
| DE002     | 1-O-hexadecanoyl-sn-glycero-3-phosphorylcholine      | C <sub>24</sub> H <sub>50</sub> NO <sub>7</sub> P                            | NR #            | 495.64                  | (Ma et al., 2016; Wei, 2016)                      |
| <b>DF</b> | <b>Nucleosides (n=12)</b>                            |                                                                              |                 |                         |                                                   |
| DF001     | Adenosine                                            | C <sub>10</sub> H <sub>13</sub> N <sub>5</sub> O <sub>4</sub>                | 60961           | 267.25                  | (Ma et al., 2016; Wei, 2016; H. Zhu et al., 2017) |
| DF002     | Uridine                                              | C <sub>9</sub> H <sub>12</sub> N <sub>2</sub> O <sub>6</sub>                 | 6029            | 244.2                   | (Li et al., 2017; H. Zhu et al., 2017)            |
| DF003     | Inosine                                              | C <sub>10</sub> H <sub>12</sub> N <sub>4</sub> O <sub>5</sub>                | 6021            | 268.23                  | (S. Zhu et al., 2017)                             |
| DF004     | Cytidine                                             | C <sub>9</sub> H <sub>13</sub> N <sub>3</sub> O <sub>5</sub>                 | 6175            | 243.22                  | (S. Zhu et al., 2017)                             |
| DF005     | Thymidine                                            | C <sub>10</sub> H <sub>14</sub> N <sub>2</sub> O <sub>5</sub>                | 5789            | 242.23                  | (S. Zhu et al., 2017)                             |
| DF006     | Guanosine                                            | C <sub>10</sub> H <sub>13</sub> N <sub>5</sub> O <sub>5</sub>                | 6802            | 283.24                  | (S. Zhu et al., 2017)                             |
| DF007     | Adenosine-5'-monophosphate                           | C <sub>10</sub> H <sub>12</sub> N <sub>5</sub> O <sub>7</sub> P <sub>2</sub> | 15938965        | 345.21                  | (S. Zhu et al., 2017)                             |
| DF008     | Guanosine-5'-monophosphate                           | C <sub>10</sub> H <sub>14</sub> N <sub>5</sub> O <sub>8</sub> P              | 135398631       | 363.22                  | (S. Zhu et al., 2017)                             |
| DF009     | 2'-Deoxyadenosine                                    | C <sub>10</sub> H <sub>13</sub> N <sub>5</sub> O <sub>3</sub>                | 13730           | 251.24                  | (S. Zhu et al., 2017)                             |
| DF010     | 2'-Deoxyadenosine-5'-monophosphate                   | C <sub>10</sub> H <sub>14</sub> N <sub>5</sub> O <sub>6</sub> P              | 12599           | 331.22                  | (S. Zhu et al., 2017)                             |
| DF011     | 2'-Deoxyinosine                                      | C <sub>10</sub> H <sub>12</sub> N <sub>4</sub> O <sub>4</sub>                | 135398593       | 252.23                  | (S. Zhu et al., 2017)                             |
| DF012     | Cytidine-5'-monophosphate                            | C <sub>9</sub> H <sub>14</sub> N <sub>3</sub> O <sub>8</sub> P               | 6131            | 323.2                   | (S. Zhu et al., 2017)                             |
| <b>DG</b> | <b>Nucleobases (n=6)</b>                             |                                                                              |                 |                         |                                                   |
| DG001     | Adenine                                              | C <sub>5</sub> H <sub>5</sub> N <sub>5</sub>                                 | 190             | 135.13                  | (S. Zhu et al., 2017)                             |
| DG002     | Uracil                                               | C <sub>4</sub> H <sub>4</sub> N <sub>2</sub> O <sub>2</sub>                  | 1174            | 112.09                  | (S. Zhu et al., 2017)                             |
| DG003     | Thymine                                              | C <sub>5</sub> H <sub>6</sub> N <sub>2</sub> O <sub>2</sub>                  | 1135            | 126.11                  | (S. Zhu et al., 2017)                             |

| No.       | Derivatives and Constituents | Molecular Formula                                                           | PubChem CID/SID | Molecule Weight (g/mol) | References                                     |
|-----------|------------------------------|-----------------------------------------------------------------------------|-----------------|-------------------------|------------------------------------------------|
| DG004     | Guanine                      | C <sub>5</sub> H <sub>5</sub> N <sub>5</sub> O                              | 135398634       | 151.13                  | (S. Zhu et al., 2017)                          |
| DG005     | Hypoxanthine                 | C <sub>5</sub> H <sub>4</sub> N <sub>4</sub> O                              | 135398638       | 136.11                  | (S. Zhu et al., 2017)                          |
| DG006     | Cytosine                     | C <sub>4</sub> H <sub>5</sub> N <sub>3</sub> O                              | 597             | 111.1                   | (S. Zhu et al., 2017)                          |
| <b>DH</b> | <b>Amino acids (n=17)</b>    |                                                                             |                 |                         |                                                |
| DH001     | Proline                      | C <sub>5</sub> H <sub>9</sub> NO <sub>2</sub>                               | 614             | 115.13                  | (Li et al., 2017; Wei et al., 2016)            |
| DH002     | Cystine                      | C <sub>6</sub> H <sub>12</sub> N <sub>2</sub> O <sub>4</sub> S <sub>2</sub> | 595             | 240.3                   | (Wei et al., 2016)                             |
| DH003     | Valine                       | C <sub>5</sub> H <sub>11</sub> NO <sub>2</sub>                              | 6287            | 117.15                  | (Li et al., 2017; Wei et al., 2016; Zhu, 2018) |
| DH004     | Isoleucine                   | C <sub>6</sub> H <sub>13</sub> NO <sub>2</sub>                              | 6306            | 131.17                  | (Li et al., 2017; Wei et al., 2016; Zhu, 2018) |
| DH005     | Phenylalanine                | C <sub>9</sub> H <sub>11</sub> NO <sub>2</sub>                              | 6140            | 165.19                  | (Li et al., 2017; Wei et al., 2016; Zhu, 2018) |
| DH006     | Asparaginic acid             | C <sub>4</sub> H <sub>7</sub> NO <sub>4</sub>                               | 5960            | 133.1                   | (Li et al., 2017; Wei et al., 2016; Zhu, 2018) |
| DH007     | Methionine                   | C <sub>3</sub> H <sub>11</sub> NO <sub>2</sub> S                            | 6137            | 149.208                 | (Li et al., 2017; Wei et al., 2016; Zhu, 2018) |
| DH008     | Histidine                    | C <sub>6</sub> H <sub>9</sub> N <sub>3</sub> O <sub>2</sub>                 | 6274            | 155.15                  | (Wei et al., 2016)                             |
| DH009     | γ-Aminobutyric acid          | C <sub>4</sub> H <sub>9</sub> NO <sub>2</sub>                               | 119             | 103.12                  | (Wei et al., 2016; Zhu, 2018)                  |
| DH010     | Glutamic acid                | C <sub>5</sub> H <sub>9</sub> NO <sub>4</sub>                               | 33032           | 147.13                  | (Li et al., 2017)                              |
| DH011     | Alanine                      | C <sub>3</sub> H <sub>7</sub> NO <sub>2</sub>                               | 5950            | 89.09                   | (Li et al., 2017)                              |
| DH012     | Arginine                     | C <sub>6</sub> H <sub>14</sub> N <sub>4</sub> O <sub>2</sub>                | 6322            | 174.2                   | (Li et al., 2017)                              |
| DH013     | Threonine                    | C <sub>4</sub> H <sub>9</sub> NO <sub>3</sub>                               | 6288            | 119.12                  | (Li et al., 2017)                              |
| DH014     | Tryptophan                   | C <sub>11</sub> H <sub>12</sub> N <sub>2</sub> O <sub>2</sub>               | 6305            | 204.22                  | (Li et al., 2017; Zhu, 2018)                   |
| DH015     | Tyrosine                     | C <sub>9</sub> H <sub>11</sub> NO <sub>3</sub>                              | 6057            | 181.19                  | (Li et al., 2017; Zhu, 2018)                   |
| DH016     | L-Proline                    | C <sub>5</sub> H <sub>9</sub> NO <sub>2</sub>                               | 145742          | 115.13                  | (S. Zhu et al., 2017)                          |
| DH017     | Taurine                      | C <sub>2</sub> H <sub>7</sub> NO <sub>3</sub> S                             | 1123            | 125.15                  | (S. Zhu et al., 2017)                          |
| <b>DI</b> | <b>Alkaloids (n=1)</b>       |                                                                             |                 |                         |                                                |
| DI001     | Banegasine                   | C <sub>11</sub> H <sub>12</sub> N <sub>2</sub> O <sub>2</sub>               | NR #            | 204.23                  | (Ma et al., 2016; Wei, 2016)                   |
| <b>DJ</b> | <b>Vitamins (n=2)</b>        |                                                                             |                 |                         |                                                |
| DJ001     | Vitamin E                    | C <sub>29</sub> H <sub>50</sub> O <sub>2</sub>                              | 14985           | 430.7                   | (X. Wang et al., 2018)                         |

| No.       | Derivatives and Constituents | Molecular Formula                               | PubChem CID/SID | Molecule Weight (g/mol) | References                                    |
|-----------|------------------------------|-------------------------------------------------|-----------------|-------------------------|-----------------------------------------------|
| DJ002     | Choline                      | C <sub>5</sub> H <sub>14</sub> NO <sup>+</sup>  | 305             | 104.17                  | (Li et al., 2017)                             |
| <b>DK</b> | <b>Monoglycerides (n=1)</b>  |                                                 |                 |                         |                                               |
| DK001     | Glyceryl monolinoleate       | C <sub>21</sub> H <sub>38</sub> O <sub>4</sub>  | 5283469         | 354.5                   | (Zhu, 2018)                                   |
| <b>DL</b> | <b>Carbohydrates (n=43)</b>  |                                                 |                 |                         |                                               |
| DL001     | α-Glucose                    | C <sub>6</sub> H <sub>12</sub> O <sub>6</sub>   | 79025           | 180.16                  | (Li et al., 2017)                             |
| DL002     | β-Glucose                    | C <sub>6</sub> H <sub>12</sub> O <sub>6</sub>   | 64689           | 180.16                  | (Li et al., 2017)                             |
| DL003     | Sucrose                      | C <sub>12</sub> H <sub>22</sub> O <sub>11</sub> | 5988            | 342.3                   | (Li et al., 2017; Ma et al., 2016; Wei, 2016) |
| DL004     | Maltose                      | C <sub>12</sub> H <sub>22</sub> O <sub>11</sub> | 6255            | 342.3                   | (Ma et al., 2016; Wei, 2016)                  |
| DL005     | As-IIIa                      | NR                                              | NR              | NR                      | (Wei et al., 2016)                            |
| DL006     | As-IIIb                      | NR                                              | NR              | NR                      | (Wei et al., 2016)                            |
| DL007     | X-C-3-II                     | NR                                              | NR              | NR                      | (Wei et al., 2016)                            |
| DL008     | X-C-3-III                    | NR                                              | NR              | NR                      | (Wei et al., 2016)                            |
| DL009     | X-C-3-IV                     | NR                                              | NR              | NR                      | (Wei et al., 2016)                            |
| DL010     | XC-1                         | NR                                              | NR              | NR                      | (Wei et al., 2016)                            |
| DL011     | ASP1                         | NR                                              | NR              | NR                      | (Wei et al., 2016)                            |
| DL012     | ASP2                         | NR                                              | NR              | NR                      | (Wei et al., 2016)                            |
| DL013     | ASP3                         | NR                                              | NR              | NR                      | (Wei et al., 2016)                            |
| DL014     | APF1                         | NR                                              | NR              | NR                      | (Wei et al., 2016)                            |
| DL015     | APF2                         | NR                                              | NR              | NR                      | (Wei et al., 2016)                            |
| DL016     | APF3                         | NR                                              | NR              | NR                      | (Wei et al., 2016)                            |
| DL017     | W-ASP11                      | NR                                              | NR              | NR                      | (Wei et al., 2016)                            |
| DL018     | W-ASP12                      | NR                                              | NR              | NR                      | (Wei et al., 2016)                            |
| DL019     | W-ASP-2                      | NR                                              | NR              | NR                      | (Wei et al., 2016)                            |
| DL020     | W-ASP-3                      | NR                                              | NR              | NR                      | (Wei et al., 2016)                            |
| DL021     | APS-1cI                      | NR                                              | NR              | NR                      | (Wei et al., 2016)                            |
| DL022     | APS-1cII                     | NR                                              | NR              | NR                      | (Wei et al., 2016)                            |
| DL023     | APS-1d                       | NR                                              | NR              | NR                      | (Wei et al., 2016)                            |
| DL024     | ASDII-3-3                    | NR                                              | NR              | NR                      | (Wei et al., 2016)                            |
| DL025     | APS-2a                       | NR                                              | NR              | NR                      | (Wei et al., 2016)                            |
| DL026     | APS-bII                      | NR                                              | NR              | NR                      | (Wei et al., 2016)                            |

| No.       | Derivatives and Constituents          | Molecular Formula                                 | PubChem CID/SID | Molecule Weight (g/mol) | References             |
|-----------|---------------------------------------|---------------------------------------------------|-----------------|-------------------------|------------------------|
| DL027     | APS-3a                                | NR                                                | NR              | NR                      | (Wei et al., 2016)     |
| DL028     | APS-3b                                | NR                                                | NR              | NR                      | (Wei et al., 2016)     |
| DL029     | APS-3c                                | NR                                                | NR              | NR                      | (Wei et al., 2016)     |
| DL030     | APS-1a                                | NR                                                | NR              | NR                      | (Wei et al., 2016)     |
| DL031     | ASPSF1                                | NR                                                | NR              | NR                      | (Wei et al., 2016)     |
| DL032     | ASPSF2                                | NR                                                | NR              | NR                      | (Wei et al., 2016)     |
| DL033     | ASPSF3                                | NR                                                | NR              | NR                      | (Wei et al., 2016)     |
| DL034     | ASPSF4                                | NR                                                | NR              | NR                      | (Wei et al., 2016)     |
| DL035     | ASTP                                  | NR                                                | NR              | NR                      | (Wei et al., 2016)     |
| DL036     | ASTUP                                 | NR                                                | NR              | NR                      | (Wei et al., 2016)     |
| DL037     | ASJP                                  | NR                                                | NR              | NR                      | (Wei et al., 2016)     |
| DL038     | ASYP                                  | NR                                                | NR              | NR                      | (Wei et al., 2016)     |
| DL039     | CAPS30                                | NR                                                | NR              | NR                      | (J. Wang et al., 2016) |
| DL040     | CAPS50                                | NR                                                | NR              | NR                      | (J. Wang et al., 2016) |
| DL041     | CAPS70                                | NR                                                | NR              | NR                      | (J. Wang et al., 2016) |
| DL042     | CAPS80                                | NR                                                | NR              | NR                      | (J. Wang et al., 2016) |
| DL043     | CAPSt                                 | NR                                                | NR              | NR                      | (J. Wang et al., 2016) |
| <b>DM</b> | <b>Phthalic monoglycosides (n=11)</b> |                                                   |                 |                         |                        |
| DM001     | Ligustilide glucoside sulphate 1      | C <sub>21</sub> H <sub>24</sub> O <sub>17</sub> S | NR              | 580.48                  | (L. Wang et al., 2019) |
| DM002     | Ligustilide glucoside sulphate 2      | C <sub>21</sub> H <sub>24</sub> O <sub>17</sub> S | NR              | 580.48                  | (L. Wang et al., 2019) |
| DM003     | Ligustilide glucoside sulphate 3      | C <sub>21</sub> H <sub>24</sub> O <sub>17</sub> S | NR              | 580.48                  | (L. Wang et al., 2019) |
| DM004     | Ligustilide glucoside sulphate 4      | C <sub>21</sub> H <sub>24</sub> O <sub>17</sub> S | NR              | 580.48                  | (L. Wang et al., 2019) |
| DM005     | Phthalide derivative glucoside 1      | C <sub>25</sub> H <sub>30</sub> O <sub>13</sub>   | NR              | 538.51                  | (L. Wang et al., 2019) |
| DM006     | Phthalide derivative glucoside 2      | C <sub>25</sub> H <sub>20</sub> O <sub>13</sub>   | NR              | 538.51                  | (L. Wang et al., 2019) |
| DM007     | Phthalide derivative glucoside 3      | C <sub>25</sub> H <sub>20</sub> O <sub>13</sub>   | NR              | 538.51                  | (L. Wang et al., 2019) |
| DM008     | Phthalide derivative glucoside 4      | C <sub>24</sub> H <sub>20</sub> O <sub>13</sub>   | NR              | 516.42                  | (L. Wang et al., 2019) |
| DM009     | Phthalide derivative glucoside 5      | C <sub>26</sub> H <sub>22</sub> O <sub>13</sub>   | NR              | 542.45                  | (L. Wang et al., 2019) |
| DM010     | Phthalide glucoside sulphate 1        | C <sub>18</sub> H <sub>28</sub> O <sub>11</sub> S | NR              | 452.48                  | (L. Wang et al., 2019) |
| DM011     | Phthalide glucoside sulphate 2        | C <sub>18</sub> H <sub>28</sub> O <sub>11</sub> S | NR              | 452.48                  | (L. Wang et al., 2019) |
| <b>DN</b> | <b>Elements (n=18)</b>                |                                                   |                 |                         |                        |

| No.   | Derivatives and Constituents | Molecular Formula | PubChem CID/SID | Molecule Weight (g/mol) | References                                                                        |
|-------|------------------------------|-------------------|-----------------|-------------------------|-----------------------------------------------------------------------------------|
| DN001 | Arsenic                      | As                | 5359596         | 74.922                  | (Qin, 2017; Rong & Zhang, 2017; H. Wang et al., 2019)                             |
| DN002 | Boron                        | B                 | 5462311         | 10.81                   | (H. Wang et al., 2019)                                                            |
| DN003 | Cadmium                      | Cd                | 23973           | 112.414                 | (Rong & Zhang, 2017; H. Wang et al., 2019)                                        |
| DN004 | Cobalt                       | Co                | 104730          | 58.933                  | (H. Wang et al., 2019)                                                            |
| DN005 | Chromium                     | Cr                | 23976           | 51.996                  | (Chen, 2017; Cui et al., 2017; H. Wang et al., 2019)                              |
| DN006 | Copper                       | Cu                | 23978           | 63.546                  | (Chen, 2017; Cui et al., 2017; Qin et al., 2017; Qin, 2017; H. Wang et al., 2019) |
| DN007 | Ferrum                       | Fe                | 23925           | 55.84                   | (Chen, 2017; Qin et al., 2017)                                                    |
| DN008 | Mercury                      | Hg                | 23931           | 200.592                 | (Rong & Zhang, 2017; H. Wang et al., 2019)                                        |
| DN009 | Manganese                    | Mn                | 23930           | 54.938                  | (Chen, 2017; Cui et al., 2017; Qin et al., 2017; H. Wang et al., 2019)            |
| DN010 | Molybdenum                   | Mo                | 23932           | 95.95                   | (Cui et al., 2017; H. Wang et al., 2019)                                          |
| DN011 | Nickel                       | Ni                | 935             | 58.693                  | (Chen, 2017; H. Wang et al., 2019)                                                |
| DN012 | Lead                         | Pb                | 5352425         | 207.2                   | (Qin et al., 2017; Rong & Zhang, 2017; H. Wang et al., 2019)                      |
| DN013 | Rubidium                     | Rb                | 5357696         | 85.468                  | (H. Wang et al., 2019)                                                            |
| DN014 | Selenium                     | Se                | 6326970         | 78.971                  | (Chen, 2017; H. Wang et al., 2019)                                                |
| DN015 | Tin                          | Sn                | 5352426         | 118.71                  | (H. Wang et al., 2019)                                                            |
| DN016 | Strontium                    | Sr                | 5359327         | 87.62                   | (H. Wang et al., 2019)                                                            |
| DN017 | Vanadium                     | V                 | 23990           | 50.941                  | (Chen, 2017; H. Wang et al., 2019)                                                |

| No.                                      | Derivatives and Constituents | Molecular Formula                               | PubChem CID/SID | Molecule Weight (g/mol) | References                                                                                        |
|------------------------------------------|------------------------------|-------------------------------------------------|-----------------|-------------------------|---------------------------------------------------------------------------------------------------|
| DN018                                    | Zinc                         | Zn                                              | 23994           | 65.379                  | (Chen, 2017; Cui et al., 2017; Qin et al., 2017; H. Wang et al., 2019)                            |
| <b>2. Fritillariae Thunbergii Bulbus</b> |                              |                                                 |                 |                         |                                                                                                   |
| ZA                                       | <b>Alkaloids (n=26)</b>      |                                                 |                 |                         |                                                                                                   |
| ZA01                                     | Peimine                      | C <sub>27</sub> H <sub>45</sub> NO <sub>3</sub> | 131900          | 431.661                 | (Chen et al., 2016; Duan et al., 2012; Guo, 2007; Huang, 2016; Kim et al., 2016; Ma et al., 2008) |
| ZA02                                     | Peiminine                    | C <sub>27</sub> H <sub>43</sub> NO <sub>3</sub> | 167691          | 429.645                 | (Cheng et al., 2008; Suh et al., 2018; Xue & Gu, 2005)                                            |
| ZA03                                     | Zhebeinine                   | C <sub>27</sub> H <sub>45</sub> NO <sub>3</sub> | 21121503        | 431.661                 | (Zhang et al., 1993b)                                                                             |
| ZA04                                     | Zhebeinone                   | C <sub>27</sub> H <sub>43</sub> NO <sub>3</sub> | NR #            | 429.645                 | (Zhang et al., 1992)                                                                              |
| ZA05                                     | Ebeiedine                    | C <sub>27</sub> H <sub>45</sub> NO <sub>2</sub> | 101324888       | 415.662                 | (Kim et al., 2016; Suh et al., 2018)                                                              |
| ZA06                                     | Ebeiedinone                  | C <sub>27</sub> H <sub>43</sub> NO <sub>2</sub> | 102062796       | 413.646                 | (Suh et al., 2018; X. Wu et al., 2018)                                                            |
| ZA07                                     | Isoverticine                 | C <sub>27</sub> H <sub>45</sub> NO <sub>3</sub> | 21573744        | 431.661                 | (Suh et al., 2018; X. Wu et al., 2018)                                                            |
| ZA08                                     | Suchengbeisine               | C <sub>27</sub> H <sub>43</sub> NO <sub>3</sub> | 102112537       | 429.645                 | (Kim et al., 2016; Suh et al., 2018)                                                              |
| ZA09                                     | Peimisine                    | C <sub>27</sub> H <sub>41</sub> NO <sub>3</sub> | 161294          | 427.629                 | (Duan et al., 2012; Zhou et al., 2010)                                                            |
| ZA10                                     | Peimisine-N-oxide            | C <sub>27</sub> H <sub>42</sub> NO <sub>4</sub> | NR              | 444.636                 | (Cui et al., 2016)                                                                                |
| ZA11                                     | Zhebeinoside                 | C <sub>33</sub> H <sub>55</sub> NO <sub>8</sub> | NR #            | 593.802                 | (Ma et al., 2014; Zhou et al., 2010)                                                              |
| ZA12                                     | Verticinone-3-β-D-glucoside  | C <sub>33</sub> H <sub>53</sub> NO <sub>8</sub> | 90479257        | 591.786                 | (Zhou et al., 2010)                                                                               |
| ZA13                                     | Puqietinone                  | C <sub>28</sub> H <sub>47</sub> NO <sub>2</sub> | 10693900        | 429.689                 | (Zhou et al., 2010)                                                                               |
| ZA14                                     | Puqiedinone                  | C <sub>27</sub> H <sub>43</sub> NO <sub>2</sub> | 126149          | 413.646                 | (Ma et al., 2014; Zhou et al., 2010)                                                              |



| No.       | Derivatives and Constituents                     | Molecular Formula                                             | PubChem CID/SID | Molecule Weight (g/mol) | References                           |
|-----------|--------------------------------------------------|---------------------------------------------------------------|-----------------|-------------------------|--------------------------------------|
| ZA15      | Puqiedine                                        | C <sub>27</sub> H <sub>45</sub> NO <sub>2</sub>               | 101400593       | 415.662                 | (Ma et al., 2014; Zhou et al., 2010) |
| ZA16      | Eduardine                                        | C <sub>27</sub> H <sub>43</sub> NO <sub>2</sub>               | NR #            | 413.646                 | (Zhang et al., 1991)                 |
| ZA17      | Zhebeirine                                       | C <sub>27</sub> H <sub>43</sub> NO <sub>2</sub>               | NR #            | 413.646                 | (Zhou et al., 2017)                  |
| ZA18      | 2,3-deoxyladenosine                              | C <sub>10</sub> H <sub>11</sub> N <sub>5</sub> O <sub>2</sub> | NR              | 233.231                 | (Zhou et al., 2017)                  |
| ZA19      | N-demethylpuqietinone                            | C <sub>27</sub> H <sub>45</sub> NO <sub>2</sub>               | 11304576        | 415.662                 | (Zhou et al., 2017)                  |
| ZA20      | Puqienine B                                      | C <sub>28</sub> H <sub>45</sub> NO <sub>2</sub>               | 11419389        | 443.672                 | (Zhou et al., 2017)                  |
| ZA21      | Zhebeinone-3-β-D-glucoside                       | C <sub>33</sub> H <sub>55</sub> NO <sub>8</sub>               | NR #            | 593.802                 | (Zhou et al., 2017)                  |
| ZA22      | Peiminoside                                      | C <sub>33</sub> H <sub>55</sub> NO <sub>7</sub>               | 90479565        | 577.803                 | (Morimoto & Kimata, 1960)            |
| ZA23      | Frithunbol A                                     | C <sub>27</sub> H <sub>41</sub> NO <sub>4</sub>               | NR #            | 443.628                 | (Suh et al., 2018)                   |
| ZA24      | Frithunbol B                                     | C <sub>27</sub> H <sub>42</sub> NO <sub>3</sub>               | NR #            | 428.637                 | (Suh et al., 2018)                   |
| ZA25      | Eduardinine                                      | C <sub>27</sub> H <sub>45</sub> NO <sub>2</sub>               | NR #            | 415.662                 | (Suh et al., 2018)                   |
| ZA26      | 3β-hydroxy-5α-jervanin-12-en-6-one               | C <sub>27</sub> H <sub>42</sub> NO <sub>3</sub>               | NR #            | 428.637                 | (Suh et al., 2018)                   |
| <b>ZB</b> | <b>Compounds from essential oils (n=28)</b>      |                                                               |                 |                         |                                      |
| ZB01      | δ-elemene                                        | C <sub>15</sub> H <sub>24</sub>                               | 12309449        | 204.357                 | (Cao et al., 2012)                   |
| ZB02      | δ-selinene                                       | C <sub>15</sub> H <sub>24</sub>                               | 520383          | 204.357                 | (Cao et al., 2012)                   |
| ZB03      | Tetradecanoic acid                               | C <sub>14</sub> H <sub>28</sub> O <sub>2</sub>                | 11005           | 228.376                 | (Cao et al., 2012)                   |
| ZB04      | Pentadecanoic acid                               | C <sub>15</sub> H <sub>30</sub> O <sub>2</sub>                | 13849           | 242.403                 | (Cao et al., 2012)                   |
| ZB05      | Hexadecanoic acid, methyl ester                  | C <sub>17</sub> H <sub>34</sub> O <sub>2</sub>                | 8181            | 270.457                 | (Cao et al., 2012; Du et al., 2018)  |
| ZB06      | 9-Hexadecenoic acid                              | C <sub>16</sub> H <sub>30</sub> O <sub>2</sub>                | 5282745         | 254.414                 | (Cao et al., 2012)                   |
| ZB07      | N-hexadecanoic acid                              | C <sub>16</sub> H <sub>32</sub> O <sub>2</sub>                | 985             | 256.43                  | (Cao et al., 2012)                   |
| ZB08      | Kaur-15-ene                                      | C <sub>20</sub> H <sub>32</sub>                               | 521318          | 272.476                 | (Cao et al., 2012)                   |
| ZB09      | Heptadecanoic acid                               | C <sub>17</sub> H <sub>34</sub> O <sub>2</sub>                | 10465           | 270.457                 | (Cao et al., 2012)                   |
| ZB10      | Kaurene                                          | C <sub>20</sub> H <sub>32</sub>                               | 91746569        | 272.476                 | (Cao et al., 2012)                   |
| ZB11      | 9,12-Octadecadienoic acid (Z,Z)-, methyl ester   | C <sub>19</sub> H <sub>34</sub> O <sub>2</sub>                | 5284421         | 294.479                 | (Cao et al., 2012)                   |
| ZB12      | 9-Tetradecenal, (Z)-                             | C <sub>14</sub> H <sub>26</sub> O                             | 5364471         | 210.361                 | (Cao et al., 2012)                   |
| ZB13      | 9,12-Octadecadienoic acid, methyl ester, (E, E)- | C <sub>19</sub> H <sub>34</sub> O <sub>2</sub>                | 135058711       | 294.479                 | (Cao et al., 2012)                   |
| ZB14      | Oleic acid                                       | C <sub>18</sub> H <sub>34</sub> O <sub>2</sub>                | 445639          | 282.468                 | (Cao et al., 2012)                   |
| ZB15      | Linoleic acid, ethyl ester                       | C <sub>20</sub> H <sub>36</sub> O <sub>2</sub>                | 5282184         | 308.506                 | (Cao et al., 2012)                   |
| ZB16      | Butylated hydroxytoluene                         | C <sub>15</sub> H <sub>24</sub> O                             | 31404           | 220.356                 | (Du et al., 2018)                    |

| No.                           | Derivatives and Constituents                                                                                | Molecular Formula                              | PubChem CID/SID | Molecule Weight (g/mol) | References                                                     |
|-------------------------------|-------------------------------------------------------------------------------------------------------------|------------------------------------------------|-----------------|-------------------------|----------------------------------------------------------------|
| ZB17                          | L-(+)-Ascorbic acid 2,6-dihexadecanoate                                                                     | C <sub>38</sub> H <sub>68</sub> O <sub>8</sub> | 54722209        | 652.954                 | (Du et al., 2018)                                              |
| ZB18                          | Ethyl 9-hexadecenoate                                                                                       | C <sub>18</sub> H <sub>34</sub> O <sub>2</sub> | 5364759         | 282.468                 | (Du et al., 2018)                                              |
| ZB19                          | Hexadecanoic acid, ethyl ester                                                                              | C <sub>18</sub> H <sub>36</sub> O <sub>2</sub> | 12366           | 284.484                 | (Du et al., 2018)                                              |
| ZB20                          | 1H-Naphtho [2,1-B] pyran, 3-ethenyldodecahydro-3,4a,7,7,10a-pentamethyl-                                    | C <sub>20</sub> H <sub>34</sub> O              | 273540178       | 290.491                 | (Du et al., 2018)                                              |
| ZB21                          | Kaur-16-ene                                                                                                 | C <sub>20</sub> H <sub>32</sub> O              | 520687          | 272.476                 | (Du et al., 2018)                                              |
| ZB22                          | 9,11-Octadecadienoic acid, methyl ester, (E, E)-                                                            | C <sub>19</sub> H <sub>34</sub> O <sub>2</sub> | 319301067       | 294.479                 | (Du et al., 2018)                                              |
| ZB23                          | 9,12-Octadecadienoic acid                                                                                   | C <sub>18</sub> H <sub>32</sub> O <sub>2</sub> | 5282457         | 280.452                 | (Du et al., 2018)                                              |
| ZB24                          | Octadecanoic acid, ethyl ester                                                                              | C <sub>20</sub> H <sub>40</sub> O <sub>2</sub> | 8122            | 312.538                 | (Du et al., 2018)                                              |
| ZB25                          | 2(1H)-Phenanthrene, 3,4,4a,4b,5,6,7,8,10,10a-decahydro-1,1,4a,7,7-pentamethyl, [4aR-(4a.α., 4b.β.,10a.β.)]- | C <sub>19</sub> H <sub>30</sub> O              | 621255          | 274.448                 | (Du et al., 2018)                                              |
| ZB26                          | 3-Methyleneandrostan-17-ol                                                                                  | C <sub>20</sub> H <sub>32</sub> O              | 625647          | 288.475                 | (Du et al., 2018)                                              |
| ZB27                          | Androst-4-en-3-one, 17-hydroxy-, (17.β.)                                                                    | C <sub>19</sub> H <sub>28</sub> O <sub>2</sub> | 50049744        | 288.431                 | (Du et al., 2018)                                              |
| ZB28                          | Podocarp-7-en-3.β.-ol, 13.β.-methyl-13-vinyl-                                                               | C <sub>20</sub> H <sub>32</sub> O              | 620519          | 288.475                 | (Du et al., 2018)                                              |
| <b>ZC Diterpenoids (n=13)</b> |                                                                                                             |                                                |                 |                         |                                                                |
| ZC01                          | Isopimaran-19-ol                                                                                            | C <sub>20</sub> H <sub>32</sub> O              | 75399514        | 288.475                 | (Kitajima, Noda, et al., 1982)                                 |
| ZC02                          | Isopimaran-19-oic acid, methyl ester                                                                        | C <sub>21</sub> H <sub>32</sub> O <sub>2</sub> | NR #            | 316.485                 | (Kitajima, Komori, et al., 1982; Kitajima, Noda, et al., 1982) |
| ZC03                          | Ent-kauran-16β, 17-diol                                                                                     | C <sub>20</sub> H <sub>34</sub> O <sub>2</sub> | NR #            | 306.49                  | (Kitajima, Komori, et al., 1982; Kitajima, Noda, et al., 1982) |
| ZC04                          | Ent-kauran-16α, 17-diol                                                                                     | C <sub>20</sub> H <sub>34</sub> O <sub>2</sub> | NR #            | 306.49                  | (Kitajima, Komori, et al., 1982; Kitajima, Noda, et al., 1982) |
| ZC05                          | Ent-16β, 17-epoxy-kaurane                                                                                   | C <sub>20</sub> H <sub>32</sub> O              | 79592848        | 288.475                 | (Kitajima, Noda, et al., 1982)                                 |
| ZC06                          | Ent-16α-methoxy-kauran-17-ol                                                                                | C <sub>21</sub> H <sub>36</sub> O <sub>2</sub> | 51842049        | 320.517                 | (Kitajima, Noda, et al., 1982)                                 |
| ZC07                          | Ent-kaur-15-en-17-ol                                                                                        | C <sub>20</sub> H <sub>32</sub> O              | 3082069         | 288.475                 | (Kitajima, Noda, et al., 1982)                                 |
| ZC08                          | Trans-communol                                                                                              | C <sub>20</sub> H <sub>32</sub> O              | 51909318        | 288.475                 | (Kitajima, Komori, et al., 1982)                               |
| ZC09                          | Trans-communic acid, methyl ester                                                                           | C <sub>21</sub> H <sub>32</sub> O <sub>2</sub> | NR #            | 316.485                 | (Kitajima, Komori, et al., 1982)                               |
| ZC10                          | Ent-17-norkauran-16-one                                                                                     | C <sub>19</sub> H <sub>30</sub> O              | 12740861        | 274.448                 | (Kitajima, Komori, et al., 1982)                               |
| ZC11                          | Ent-15β,16-epoxy-kauran-17-ol                                                                               | C <sub>20</sub> H <sub>32</sub> O <sub>2</sub> | 51511087        | 304.474                 | (Kitajima, Komori, et al., 1982)                               |
| ZC12                          | Ent-16β-hydroxy-kauran-17-yl ent-kaur-15-en-17-oate                                                         | C <sub>40</sub> H <sub>63</sub> O <sub>3</sub> | NR #            | 591.941                 | (Kitajima, Komori, et al., 1982)                               |

| No.       | Derivatives and Constituents  | Molecular Formula                                                           | PubChem CID/SID | Molecule Weight (g/mol) | References                       |
|-----------|-------------------------------|-----------------------------------------------------------------------------|-----------------|-------------------------|----------------------------------|
| ZC13      | Ent-(16S)-atisan-13, 17-oxide | C <sub>20</sub> H <sub>32</sub> O                                           | 50418337        | 288.475                 | (Kitajima, Komori, et al., 1982) |
| <b>ZD</b> | <b>Carbohydrates (n=2)</b>    |                                                                             |                 |                         |                                  |
| ZD01      | β-D-glucose4-1β-D-galactose   | C <sub>12</sub> H <sub>22</sub> O <sub>11</sub>                             | NR #            | 342.297                 | (Chen & Wang, 2012)              |
| ZD02      | Sucrose                       | C <sub>12</sub> H <sub>22</sub> O <sub>11</sub>                             | 5988            | 342.297                 | (Chen & Wang, 2012)              |
| <b>ZE</b> | <b>Sterols (n=2)</b>          |                                                                             |                 |                         |                                  |
| ZE01      | β-sitosterol                  | C <sub>29</sub> H <sub>50</sub> O                                           | 222284          | 414.718                 | (Zhang et al., 1993b)            |
| ZE02      | Daucosterol                   | C <sub>35</sub> H <sub>60</sub> O <sub>6</sub>                              | 5742590         | 576.859                 | (Zhang et al., 1993b)            |
| <b>ZF</b> | <b>Amino acids (n=18)</b>     |                                                                             |                 |                         |                                  |
| ZF01      | Glycine                       | C <sub>2</sub> H <sub>5</sub> NO <sub>2</sub>                               | 750             | 75.067                  | (C. Zhang et al., 2016)          |
| ZF02      | Leucine                       | C <sub>6</sub> H <sub>13</sub> NO <sub>2</sub>                              | 6106            | 131.175                 | (C. Zhang et al., 2016)          |
| ZF03      | Methionine                    | C <sub>5</sub> H <sub>11</sub> NO <sub>2</sub> S                            | 6137            | 149.208                 | (C. Zhang et al., 2016)          |
| ZF04      | Tyrosine                      | C <sub>9</sub> H <sub>11</sub> NO <sub>3</sub>                              | 6057            | 181.191                 | (C. Zhang et al., 2016)          |
| ZF05      | Histidine                     | C <sub>6</sub> H <sub>9</sub> N <sub>3</sub> O <sub>2</sub>                 | 6274            | 155.157                 | (C. Zhang et al., 2016)          |
| ZF06      | Threonine                     | C <sub>4</sub> H <sub>9</sub> NO <sub>3</sub>                               | 6288            | 119.12                  | (C. Zhang et al., 2016)          |
| ZF07      | Alanine                       | C <sub>3</sub> H <sub>7</sub> NO <sub>2</sub>                               | 5950            | 89.094                  | (C. Zhang et al., 2016)          |
| ZF08      | Isoleucine                    | C <sub>6</sub> H <sub>13</sub> NO <sub>2</sub>                              | 6306            | 131.175                 | (C. Zhang et al., 2016)          |
| ZF09      | Tryptophan                    | C <sub>11</sub> H <sub>12</sub> N <sub>2</sub> O <sub>2</sub>               | 6305            | 204.229                 | (C. Zhang et al., 2016)          |
| ZF10      | Cystine                       | C <sub>6</sub> H <sub>12</sub> N <sub>2</sub> O <sub>4</sub> S <sub>2</sub> | 67678           | 240.292                 | (C. Zhang et al., 2016)          |
| ZF11      | Lysine                        | C <sub>6</sub> H <sub>14</sub> N <sub>2</sub> O <sub>2</sub>                | 5962            | 146.19                  | (C. Zhang et al., 2016)          |
| ZF12      | Aspartic acid                 | C <sub>4</sub> H <sub>7</sub> NO <sub>4</sub>                               | 5960            | 133.103                 | (C. Zhang et al., 2016)          |
| ZF13      | Valine                        | C <sub>5</sub> H <sub>11</sub> NO <sub>2</sub>                              | 6287            | 117.148                 | (C. Zhang et al., 2016)          |
| ZF14      | Phenylalanine                 | C <sub>8</sub> H <sub>8</sub> O <sub>2</sub>                                | 6140            | 165.192                 | (C. Zhang et al., 2016)          |
| ZF15      | Proline                       | C <sub>5</sub> H <sub>9</sub> NO <sub>2</sub>                               | 145742          | 115.132                 | (C. Zhang et al., 2016)          |
| ZF16      | Serine                        | C <sub>3</sub> H <sub>7</sub> NO <sub>3</sub>                               | 5951            | 105.093                 | (C. Zhang et al., 2016)          |
| ZF17      | Glutamic acid                 | C <sub>5</sub> H <sub>9</sub> NO <sub>4</sub>                               | 33032           | 147.13                  | (C. Zhang et al., 2016)          |
| ZF18      | Arginine                      | C <sub>6</sub> H <sub>14</sub> N <sub>4</sub> O <sub>2</sub>                | 6322            | 174.204                 | (C. Zhang et al., 2016)          |
| <b>ZG</b> | <b>Nucleosides (n=6)</b>      |                                                                             |                 |                         |                                  |
| ZG01      | Uridine                       | C <sub>9</sub> H <sub>12</sub> N <sub>2</sub> O <sub>6</sub>                | 6029            | 244.203                 | (C. Zhang et al., 2016)          |
| ZG02      | Guanosine                     | C <sub>10</sub> H <sub>13</sub> N <sub>5</sub> O <sub>5</sub>               | 6802            | 283.244                 | (C. Zhang et al., 2016)          |
| ZG03      | Adenosine                     | C <sub>10</sub> H <sub>13</sub> N <sub>5</sub> O <sub>4</sub>               | 60961           | 267.245                 | (C. Zhang et al., 2016)          |
| ZG04      | Thymidine                     | C <sub>10</sub> H <sub>14</sub> N <sub>2</sub> O <sub>5</sub>               | 5789            | 242.231                 | (C. Zhang et al., 2016)          |

| No.       | Derivatives and Constituents                       | Molecular Formula                                             | PubChem CID/SID | Molecule Weight (g/mol) | References                                              |
|-----------|----------------------------------------------------|---------------------------------------------------------------|-----------------|-------------------------|---------------------------------------------------------|
| ZG05      | Cytidine                                           | C <sub>9</sub> H <sub>13</sub> N <sub>3</sub> O <sub>5</sub>  | 6175            | 243.219                 | (C. Zhang et al., 2016)                                 |
| ZG06      | Inosine                                            | C <sub>10</sub> H <sub>12</sub> N <sub>4</sub> O <sub>5</sub> | 6021            | 268.229                 | (C. Zhang et al., 2016)                                 |
| <b>ZH</b> | <b>Nucleobases (n=4)</b>                           |                                                               |                 |                         |                                                         |
| ZH01      | Adenine                                            | C <sub>5</sub> H <sub>5</sub> N <sub>5</sub>                  | 190             | 135.13                  | (C. Zhang et al., 2016)                                 |
| ZH02      | Hypoxanthine                                       | C <sub>5</sub> H <sub>4</sub> N <sub>4</sub> O                | 790             | 136.114                 | (C. Zhang et al., 2016)                                 |
| ZH03      | Uracil                                             | C <sub>4</sub> H <sub>4</sub> N <sub>2</sub> O <sub>2</sub>   | 1174            | 112.088                 | (C. Zhang et al., 2016)                                 |
| ZH04      | Thymine                                            | C <sub>5</sub> H <sub>6</sub> N <sub>2</sub> O <sub>2</sub>   | 1135            | 126.115                 | (C. Zhang et al., 2016)                                 |
| <b>ZI</b> | <b>Fatty acids (n=4)</b>                           |                                                               |                 |                         |                                                         |
| ZI01      | Vernolic acid                                      | C <sub>18</sub> H <sub>32</sub> O <sub>3</sub>                | 6449780         | 296.451                 | (Zhou et al., 2017)                                     |
| ZI02      | 2-monopalmitin                                     | C <sub>19</sub> H <sub>38</sub> O <sub>4</sub>                | 123409          | 330.509                 | (Zhou et al., 2017)                                     |
| ZI03      | 13(R)-hydroxy-octadeca-(9Z,11E,15Z)-trien-oic acid | C <sub>18</sub> H <sub>30</sub> O <sub>3</sub>                | 643726          | 294.435                 | (Zhou et al., 2017)                                     |
| ZI04      | Picropodophyllotoxin                               | C <sub>22</sub> H <sub>22</sub> O <sub>8</sub>                | 72435           | 414.41                  | (Zhang et al., 1993a)                                   |
| <b>ZJ</b> | <b>Lignans (n=3)</b>                               |                                                               |                 |                         |                                                         |
| ZJ01      | Octahydrocurcumin                                  | C <sub>21</sub> H <sub>28</sub> O <sub>6</sub>                | 11068834        | 376.449                 | (Zhou et al., 2017)                                     |
| ZJ02      | Zhebeiresinol                                      | C <sub>14</sub> H <sub>16</sub> O <sub>6</sub>                | 192547          | 280.276                 | (Jin et al., 1993; Zhou et al., 2017)                   |
| ZJ03      | Sauriol B                                          | C <sub>21</sub> H <sub>28</sub> O <sub>6</sub>                | 15965508        | 376.449                 | (Zhou et al., 2017)                                     |
| <b>ZK</b> | <b>Elements (n=27)</b>                             |                                                               |                 |                         |                                                         |
| ZK01      | Aluminum                                           | Al                                                            | 5359268         | 26.982                  | (Yu et al., 2007; Yuan et al., 2010)                    |
| ZK02      | Arsenic                                            | As                                                            | 5359596         | 74.922                  | (Yu et al., 2007; Yuan et al., 2010)                    |
| ZK03      | Boron                                              | B                                                             | 5462311         | 10.81                   | (Cai et al., 2013; Lou et al., 2014; Zhou et al., 2014) |
| ZK04      | Barium                                             | Ba                                                            | 5355457         | 137.327                 | (Cai et al., 2013; Yuan et al., 2010)                   |
| ZK05      | Bismuth                                            | Bi                                                            | 5359367         | 208.98                  | (Cai et al., 2013)                                      |
| ZK06      | Calcium                                            | Ca                                                            | 5460341         | 40.078                  | Yuan et al., 2010; Wang et al., 2007                    |
| ZK07      | Cadmium                                            | Cd                                                            | 23973           | 112.414                 | (Cai et al., 2013; Lou et al., 2014; Zhou et al., 2014) |

| No.  | Derivatives and Constituents | Molecular Formula | PubChem CID/SID | Molecule Weight (g/mol) | References                            |
|------|------------------------------|-------------------|-----------------|-------------------------|---------------------------------------|
| ZK08 | Cobalt                       | Co                | 104730          | 58.933                  | (Cai et al., 2013; Yu et al., 2007)   |
| ZK09 | Chromium                     | Cr                | 23976           | 51.996                  | (Liu et al., 2008; Yu et al., 2007)   |
| ZK10 | Copper                       | Cu                | 23978           | 63.546                  | (Cai et al., 2013; Lou et al., 2014)  |
| ZK11 | Iron                         | Fe                | 23925           | 55.845                  | (Cai et al., 2013; Lou et al., 2014)  |
| ZK12 | Mercury                      | Hg                | 23931           | 200.592                 | (Cai et al., 2013; Lou et al., 2014)  |
| ZK13 | Indium                       | In                | 5359967         | 114.818                 | (Cai et al., 2013)                    |
| ZK14 | Potassium                    | K                 | 5462222         | 39.098                  | (Yu et al., 2007; Yuan et al., 2010)  |
| ZK15 | Lithium                      | Li                | 3028194         | 6.94                    | (Lou et al., 2014)                    |
| ZK16 | Magnesium                    | Mg                | 5462224         | 24.305                  | (Lou et al., 2014; Yuan et al., 2010) |
| ZK17 | Manganese                    | Mn                | 23930           | 54.938                  | (Cai et al., 2013; Lou et al., 2014)  |
| ZK18 | Molybdenum                   | Mo                | 23932           | 95.95                   | (Yuan et al., 2010)                   |
| ZK19 | Sodium                       | Na                | 5360545         | 22.99                   | (Yu et al., 2007; Yuan et al., 2010)  |
| ZK20 | Nickel                       | Ni                | 935             | 58.693                  | (Cai et al., 2013; Yuan et al., 2010) |
| ZK21 | Phosphorus                   | P                 | 5462309         | 30.974                  | (Yuan et al., 2010)                   |
| ZK22 | Lead                         | Pb                | 5352425         | 207.2                   | (Cai et al., 2013; Lou et al., 2014)  |
| ZK23 | Sulphur                      | S                 | 5362487         | 32.06                   | (Lou et al., 2014)                    |
| ZK24 | Selenium                     | Se                | 6326970         | 78.971                  | (Wu et al., 1998)                     |
| ZK25 | Strontium                    | Sr                | 5359327         | 87.62                   | (Lou et al., 2014; Yu et al., 2007)   |
| ZK26 | Vanadium                     | V                 | 23990           | 50.941                  | (Wu & Zheng, 1997)                    |

| No.                                 | Derivatives and Constituents            | Molecular Formula                               | PubChem CID/SID | Molecule Weight (g/mol) | References                                             |
|-------------------------------------|-----------------------------------------|-------------------------------------------------|-----------------|-------------------------|--------------------------------------------------------|
| ZK27                                | Zinc                                    | Zn                                              | 23994           | 65.379                  | (Cai et al., 2013; Lou et al., 2014)                   |
| <b>3. Sophorae Flavescens Radix</b> |                                         |                                                 |                 |                         |                                                        |
| <b>KA</b>                           | <b>Flavonoids (n=179)</b>               |                                                 |                 |                         |                                                        |
| KA001                               | Quercetin                               | C <sub>15</sub> H <sub>10</sub> O <sub>7</sub>  | 5280343         | 302.23                  | (He et al., 2015; Weng et al., 2018)                   |
| KA002                               | Rutin                                   | C <sub>27</sub> H <sub>30</sub> O <sub>16</sub> | 5280805         | 610.5                   | (He et al., 2015; Lee et al., 2018; Weng et al., 2018) |
| KA003                               | Kushenol C                              | C <sub>25</sub> H <sub>26</sub> O <sub>7</sub>  | 5481237         | 438.5                   | (He et al., 2015; Kim et al., 2018)                    |
| KA004                               | Methylkushenol C                        | C <sub>26</sub> H <sub>28</sub> O <sub>7</sub>  | NR #            | 452.5                   | (He et al., 2015)                                      |
| KA005                               | Kushenol G                              | C <sub>25</sub> H <sub>28</sub> O <sub>8</sub>  | 44259516        | 456.5                   | (He et al., 2015; Li et al., 2019)                     |
| KA006                               | 8-Prenylkaempferol                      | C <sub>20</sub> H <sub>18</sub> O <sub>6</sub>  | 5318624         | 354.4                   | (He et al., 2015; Kim et al., 2018; Li et al., 2019)   |
| KA007                               | Isoanhydroicaritin                      | C <sub>21</sub> H <sub>20</sub> O <sub>6</sub>  | 5322079         | 368.4                   | (He et al., 2015; Z. Yang et al., 2016)                |
| KA008                               | Sophoflavescenol                        | C <sub>21</sub> H <sub>20</sub> O <sub>6</sub>  | 9929189         | 368.4                   | (He et al., 2015)                                      |
| KA009                               | Resokaempferol                          | C <sub>15</sub> H <sub>10</sub> O <sub>5</sub>  | 5281611         | 270.24                  | (He et al., 2015)                                      |
| KA010                               | 8-Lavandulylkaempferol                  | C <sub>25</sub> H <sub>26</sub> O <sub>6</sub>  | 16083184        | 422.5                   | (He et al., 2015; Li et al., 2019)                     |
| KA011                               | 8-Lavandulyl-5,7,4'-trihydroxy-flavonol | C <sub>25</sub> H <sub>26</sub> O <sub>6</sub>  | NR #            | 422.5                   | (He et al., 2015)                                      |
| KA012                               | Citrusinol                              | C <sub>20</sub> H <sub>16</sub> O <sub>6</sub>  | 44259051        | 352.3                   | (He et al., 2015)                                      |
| KA013                               | Flavenochromane B                       | C <sub>25</sub> H <sub>26</sub> O <sub>6</sub>  | 273676818       | 422.5                   | (He et al., 2015)                                      |
| KA014                               | Flavenochromane C                       | C <sub>21</sub> H <sub>20</sub> O <sub>6</sub>  | 273676819       | 368.4                   | (He et al., 2015)                                      |
| KA015                               | Kaempferol                              | C <sub>15</sub> H <sub>10</sub> O <sub>6</sub>  | 5280863         | 286.24                  | (He et al., 2015; Lee et al., 2018)                    |
| KA016                               | Catechin                                | C <sub>15</sub> H <sub>14</sub> O <sub>6</sub>  | 9064            | 290.27                  | (Lee et al., 2018)                                     |
| KA017                               | Epicatechin                             | C <sub>15</sub> H <sub>14</sub> O <sub>6</sub>  | 72276           | 290.27                  | (Lee et al., 2018)                                     |
| KA018                               | Noranhydroicaritin                      | C <sub>20</sub> H <sub>18</sub> O <sub>6</sub>  | NR #            | 354.36                  | (Zhao, 2015)                                           |
| KA019                               | Lanceolarin                             | C <sub>27</sub> H <sub>30</sub> O <sub>14</sub> | 5492234         | 578.5                   | (Zhao, 2015)                                           |

| No.   | Derivatives and Constituents | Molecular Formula                              | PubChem CID/SID | Molecule Weight (g/mol) | References                                                                                                                                              |
|-------|------------------------------|------------------------------------------------|-----------------|-------------------------|---------------------------------------------------------------------------------------------------------------------------------------------------------|
| KA020 | Kushenol A                   | C <sub>25</sub> H <sub>28</sub> O <sub>5</sub> | 44563121        | 408.5                   | (Kim et al., 2017; Kim et al., 2018; Weng et al., 2018; Zhao, 2015)                                                                                     |
| KA021 | Kushenol B                   | C <sub>30</sub> H <sub>36</sub> O <sub>6</sub> | 5318891         | 492.6                   | (He et al., 2015; Kim et al., 2017; Li et al., 2019)                                                                                                    |
| KA022 | Kushenol E                   | C <sub>25</sub> H <sub>28</sub> O <sub>6</sub> | 9979767         | 424.5                   | (He et al., 2015; Kim et al., 2017; Zhao, 2015)                                                                                                         |
| KA023 | Kushenol F                   | C <sub>25</sub> H <sub>28</sub> O <sub>6</sub> | 10455036        | 424.5                   | (He et al., 2015)                                                                                                                                       |
| KA024 | Kushenol P                   | C <sub>26</sub> H <sub>32</sub> O <sub>7</sub> | 10742453        | 456.5                   | (He et al., 2015; Zhao, 2015)                                                                                                                           |
| KA025 | Kushenol Q                   | C <sub>25</sub> H <sub>30</sub> O <sub>7</sub> | NR #            | 442.51                  | (He et al., 2015; Li et al., 2019)                                                                                                                      |
| KA026 | Kushenol R                   | C <sub>26</sub> H <sub>30</sub> O <sub>5</sub> | 42607847        | 422.5                   | (He et al., 2015; Li et al., 2019)                                                                                                                      |
| KA027 | Kushenol S                   | C <sub>20</sub> H <sub>20</sub> O <sub>5</sub> | 10854625        | 340.4                   | (He et al., 2015; Li et al., 2019)                                                                                                                      |
| KA028 | Kushenol T                   | C <sub>25</sub> H <sub>30</sub> O <sub>6</sub> | 10598514        | 426.5                   | (He et al., 2015; Li et al., 2019)                                                                                                                      |
| KA029 | Kushenol U                   | C <sub>26</sub> H <sub>30</sub> O <sub>5</sub> | 42608062        | 422.5                   | (He et al., 2015; Li et al., 2019)                                                                                                                      |
| KA030 | Kushenol V                   | C <sub>21</sub> H <sub>22</sub> O <sub>7</sub> | 10572194        | 386.4                   | (He et al., 2015)                                                                                                                                       |
| KA031 | Kushenol W                   | C <sub>21</sub> H <sub>22</sub> O <sub>7</sub> | 42608033        | 386.4                   | (He et al., 2015)                                                                                                                                       |
| KA032 | Kurarinone                   | C <sub>26</sub> H <sub>30</sub> O <sub>6</sub> | 11982640        | 438.5                   | (He et al., 2015; Q. Huang et al., 2017; Sun et al., 2017; Weng et al., 2018; Z. Yang et al., 2016; Q. Zhang, J. Yu, Y. Wang, et al., 2016; Zhao, 2015) |
| KA033 | 2'-methoxykurarinone         | C <sub>27</sub> H <sub>32</sub> O <sub>6</sub> | 133561937       | 452.5                   | (He et al., 2015; Li et al., 2019; Zhao, 2015)                                                                                                          |
| KA034 | Isokurarinone                | C <sub>26</sub> H <sub>30</sub> O <sub>6</sub> | 5318581         | 438.5                   | (He et al., 2015; Zhao, 2015)                                                                                                                           |
| KA035 | Norkurarinone                | C <sub>25</sub> H <sub>28</sub> O <sub>6</sub> | 273580998       | 424.5                   | (He et al., 2015; Li et al., 2019; Zhao, 2015)                                                                                                          |
| KA036 | Kurarinol                    | C <sub>26</sub> H <sub>32</sub> O <sub>7</sub> | 44563198        | 456.5                   | (He et al., 2015; Q. Zhang, J. Yu, Y. Wang, et al., 2016; Zhao, 2015)                                                                                   |
| KA037 | Neokurarinol                 | C <sub>27</sub> H <sub>34</sub> O <sub>7</sub> | 102090469       | 470.6                   | (He et al., 2015; Li et al., 2019)                                                                                                                      |
| KA038 | Norkurarinol                 | C <sub>25</sub> H <sub>30</sub> O <sub>7</sub> | 44563159        | 442.5                   | (He et al., 2015; Li et al., 2019)                                                                                                                      |

| No.   | Derivatives and Constituents                                                            | Molecular Formula                              | PubChem CID/SID | Molecule Weight (g/mol) | References                                                                                                      |
|-------|-----------------------------------------------------------------------------------------|------------------------------------------------|-----------------|-------------------------|-----------------------------------------------------------------------------------------------------------------|
| KA039 | Isoxanthohumol                                                                          | C <sub>21</sub> H <sub>22</sub> O <sub>5</sub> | 513197          | 354.4                   | (He et al., 2015; Q. Huang et al., 2017; Li et al., 2019; Sun et al., 2017; Z. Yang et al., 2016; Zhao, 2015)   |
| KA040 | Leachianone A                                                                           | C <sub>26</sub> H <sub>30</sub> O <sub>6</sub> | 44593449        | 438.5                   | (He et al., 2015)                                                                                               |
| KA041 | Leachianone G                                                                           | C <sub>20</sub> H <sub>20</sub> O <sub>6</sub> | 5275227         | 356.4                   | (He et al., 2015)                                                                                               |
| KA042 | Sophoraflavanone B                                                                      | C <sub>20</sub> H <sub>20</sub> O <sub>5</sub> | 252448649       | 340.4                   | (He et al., 2015; Li et al., 2019; Zhao, 2015)                                                                  |
| KA043 | 5-Methylsophoraflavanone B                                                              | C <sub>21</sub> H <sub>22</sub> O <sub>5</sub> | 273518150       | 354.4                   | (He et al., 2015)                                                                                               |
| KA044 | Sophoraflavanone G                                                                      | C <sub>25</sub> H <sub>28</sub> O <sub>6</sub> | 72936           | 424.5                   | (He et al., 2015; Q. Huang et al., 2017; Sun et al., 2017; Weng et al., 2018; Z. Yang et al., 2016; Zhao, 2015) |
| KA045 | Sophoraflavanone K                                                                      | C <sub>26</sub> H <sub>30</sub> O <sub>7</sub> | NR              | 454.5                   | (He et al., 2015; Zhao, 2015)                                                                                   |
| KA046 | Sophoraflavanone L                                                                      | C <sub>25</sub> H <sub>28</sub> O <sub>6</sub> | 16083180        | 424.5                   | (He et al., 2015)                                                                                               |
| KA047 | Naringenin                                                                              | C <sub>15</sub> H <sub>12</sub> O <sub>5</sub> | 932             | 272.25                  | (He et al., 2015)                                                                                               |
| KA048 | Naringenin-7-O-β-D-glucosyl-4'-O-β-D-glucose                                            | NR                                             | NR              | NR                      | (He et al., 2015)                                                                                               |
| KA049 | 5-Methoxy-7,2',4'-trihydroxy-8-[3,3-dimethylallyl]-flavanone                            | C <sub>21</sub> H <sub>22</sub> O <sub>6</sub> | NR #            | 370.4                   | (He et al., 2015)                                                                                               |
| KA050 | (2S)-6-lavandulyl-isopentenyl-5-methoxy-7,2',4',-trihydroxy-flavonone                   | C <sub>25</sub> H <sub>28</sub> O <sub>6</sub> | NR #            | 424.5                   | (He et al., 2015)                                                                                               |
| KA051 | (2S)-8-isopentenyl-7,2',4',-5-methoxyflavonone                                          | C <sub>21</sub> H <sub>22</sub> O <sub>6</sub> | NR #            | 370.4                   | (He et al., 2015)                                                                                               |
| KA052 | (2S)-6[2(3-hydroxyisopropyl)-5-methyl-4-hexenyl]-5-methoxy-7,2',4'-trihydroxy flavanone | C <sub>26</sub> H <sub>32</sub> O <sub>7</sub> | NR #            | 456.54                  | (He et al., 2015)                                                                                               |
| KA053 | (2S)-5, 4'-dimethoxy-8-lavandulyl-7,2'-dihydroxy flavanone                              | C <sub>27</sub> H <sub>32</sub> O <sub>6</sub> | NR #            | 452.55                  | (He et al., 2015)                                                                                               |
| KA054 | (2S)-8-(5-hydroxy-2-isopropenyl-5-methylhexyl)-7-methoxy-5,2', 4'-trihydroxy-flavanone  | C <sub>26</sub> H <sub>32</sub> O <sub>7</sub> | NR #            | 456.54                  | (He et al., 2015)                                                                                               |
| KA055 | (2S)-7,4'-dihydroxy-5-methoxy-8-(γ, γ-dimethylallyl)-flavanone                          | C <sub>21</sub> H <sub>22</sub> O <sub>5</sub> | NR #            | 354.4                   | (He et al., 2015)                                                                                               |



| No.   | Derivatives and Constituents                                                             | Molecular Formula                               | PubChem CID/SID | Molecule Weight (g/mol) | References                                                                                                           |
|-------|------------------------------------------------------------------------------------------|-------------------------------------------------|-----------------|-------------------------|----------------------------------------------------------------------------------------------------------------------|
| KA056 | (2R)-3 $\alpha$ ,7,4'-trihydroxy-5-methoxy-8-( $\gamma,\gamma$ -dimethylallyl)-flavanone | C <sub>21</sub> H <sub>22</sub> O <sub>6</sub>  | NR #            | 370.4                   | (He et al., 2015)                                                                                                    |
| KA057 | (2S)-3 $\beta$ ,7,4'-trihydroxy-5-methoxy-8-( $\gamma,\gamma$ -dimethylallyl)-flavanone  | C <sub>21</sub> H <sub>22</sub> O <sub>6</sub>  | NR #            | 370.4                   | (He et al., 2015)                                                                                                    |
| KA058 | (2S)-7,2',4'-trihydroxy-5-methoxy-8-dimethylallylflavanone                               | C <sub>21</sub> H <sub>22</sub> O <sub>6</sub>  | NR #            | 370.4                   | (He et al., 2015)                                                                                                    |
| KA059 | 3 $\beta$ ,7,4'-Trihydroxy-5-methoxy-8-[3,3-dimethylallyl]-flavanone                     | C <sub>21</sub> H <sub>22</sub> O <sub>6</sub>  | NR #            | 370.4                   | (He et al., 2015)                                                                                                    |
| KA060 | 4'-Hydroxyisolonchocarpin                                                                | C <sub>20</sub> H <sub>18</sub> O <sub>4</sub>  | 14353465        | 322.4                   | (He et al., 2015)                                                                                                    |
| KA061 | 5'-Hydroxy norkurarinol                                                                  | C <sub>25</sub> H <sub>28</sub> O <sub>8</sub>  | NR #            | 456.49                  | (Zhao, 2015)                                                                                                         |
| KA062 | 7,4''-Dihydroxy-8-(3-methylisobutanol)flavanone                                          | C <sub>20</sub> H <sub>20</sub> O <sub>5</sub>  | NR #            | 340.38                  | (Zhao, 2015)                                                                                                         |
| KA063 | 7-Hydroxy-3''-methoxy-isoflavone-7-primeveroside                                         | C <sub>27</sub> H <sub>30</sub> O <sub>13</sub> | NR              | 562.52                  | (Li et al., 2019)                                                                                                    |
| KA064 | Sophoraisoflavone C                                                                      | C <sub>30</sub> H <sub>34</sub> O <sub>5</sub>  | NR #            | 474.6                   | (Zhao, 2015)                                                                                                         |
| KA065 | Sophoraisoflavone D                                                                      | C <sub>30</sub> H <sub>34</sub> O <sub>6</sub>  | NR #            | 490.6                   | (Zhao, 2015)                                                                                                         |
| KA066 | Sophoraisoflavone A                                                                      | C <sub>20</sub> H <sub>16</sub> O <sub>6</sub>  | 10383349        | 352.3                   | (Wu, 2016; Zhao, 2015)                                                                                               |
| KA067 | Kushenol J                                                                               | C <sub>32</sub> H <sub>41</sub> O <sub>18</sub> | NR #            | 713.66                  | (He et al., 2015; Zhao, 2015)                                                                                        |
| KA068 | Kushenol H                                                                               | C <sub>26</sub> H <sub>32</sub> O <sub>8</sub>  | NR #            | 472.53                  | (He et al., 2015)                                                                                                    |
| KA069 | Kushenol I                                                                               | C <sub>25</sub> H <sub>28</sub> O <sub>7</sub>  | NR #            | 440.49                  | (He et al., 2015; R. Huang et al., 2017; Li et al., 2019; Q. Zhang, J. Yu, Y. Wang, et al., 2016)                    |
| KA070 | Kushenol K                                                                               | C <sub>26</sub> H <sub>32</sub> O <sub>8</sub>  | 5318897         | 472.5                   | (He et al., 2015)                                                                                                    |
| KA071 | Kushenol L                                                                               | C <sub>25</sub> H <sub>28</sub> O <sub>7</sub>  | 21721878        | 440.5                   | (He et al., 2015; Kim et al., 2017; Li et al., 2019; Zhao, 2015)                                                     |
| KA072 | Kushenol M                                                                               | C <sub>30</sub> H <sub>36</sub> O <sub>7</sub>  | 180948          | 508.6                   | (He et al., 2015; Zhao, 2015)                                                                                        |
| KA073 | Kushenol N                                                                               | C <sub>26</sub> H <sub>30</sub> O <sub>7</sub>  | 381851          | 454.5                   | (He et al., 2015; R. Huang et al., 2017; Li et al., 2019; Weng et al., 2018; Q. Zhang, J. Yu, Y. Wang, et al., 2016) |
| KA074 | Kushenol X                                                                               | C <sub>25</sub> H <sub>28</sub> O <sub>7</sub>  | 10599228        | 440.5                   | (He et al., 2015; Li et al., 2019)                                                                                   |

| No.   | Derivatives and Constituents                                                    | Molecular Formula                               | PubChem CID/SID | Molecule Weight (g/mol) | References                                                                                        |
|-------|---------------------------------------------------------------------------------|-------------------------------------------------|-----------------|-------------------------|---------------------------------------------------------------------------------------------------|
| KA075 | Kosamol A                                                                       | C <sub>30</sub> H <sub>38</sub> O <sub>8</sub>  | 275852942       | 526.6                   | (He et al., 2015)                                                                                 |
| KA076 | (2R, 3R)-8-isopentenyl-7,4'-dihydroxy-5-methoxy-flavanonol                      | C <sub>21</sub> H <sub>22</sub> O <sub>6</sub>  | NR #            | 370.4                   | (He et al., 2015; Li et al., 2019)                                                                |
| KA077 | (2R, 3R)-8-lavanduly-5,7,4'-trihydroxy-2'-methoxy-flavanonol                    | C <sub>26</sub> H <sub>30</sub> O <sub>7</sub>  | NR #            | 454.5                   | (He et al., 2015)                                                                                 |
| KA078 | (2R, 3R)-8-isopentenyl-7,2',4'-trihydroxy-5-methoxy-flavanonol                  | C <sub>21</sub> H <sub>22</sub> O <sub>7</sub>  | NR #            | 386.4                   | (He et al., 2015)                                                                                 |
| KA079 | Flavenochromane A                                                               | C <sub>25</sub> H <sub>28</sub> O <sub>7</sub>  | 273676817       | 440.49                  | (He et al., 2015)                                                                                 |
| KA080 | Formononetin                                                                    | C <sub>16</sub> H <sub>12</sub> O <sub>4</sub>  | 5280378         | 268.26                  | (He et al., 2015; Q. Huang et al., 2017; Kim et al., 2018; Li et al., 2019; Z. Yang et al., 2016) |
| KA081 | Daidzein                                                                        | C <sub>15</sub> H <sub>10</sub> O <sub>4</sub>  | 5281708         | 254.24                  | (He et al., 2015; Weng et al., 2018; Zhao, 2015)                                                  |
| KA082 | Biochanin A                                                                     | C <sub>16</sub> H <sub>12</sub> O <sub>5</sub>  | 5280373         | 284.26                  | (He et al., 2015; Weng et al., 2018; Zhao, 2015)                                                  |
| KA083 | 7-Methoxy-4'-hydroxyisoflavone                                                  | C <sub>12</sub> H <sub>16</sub> O <sub>4</sub>  | NR #            | 224.26                  | (He et al., 2015)                                                                                 |
| KA084 | 7,4'-Dihydroxy-3'-methoxyisoflavone                                             | C <sub>16</sub> H <sub>12</sub> O <sub>5</sub>  | 160709470       | 284.26                  | (He et al., 2015)                                                                                 |
| KA085 | Calycosin                                                                       | C <sub>16</sub> H <sub>12</sub> O <sub>5</sub>  | 5280448         | 284.26                  | (He et al., 2015; Q. Huang et al., 2017; Sun et al., 2017; Zhao, 2015)                            |
| KA086 | Kushenol O                                                                      | C <sub>27</sub> H <sub>30</sub> O <sub>13</sub> | 44257224        | 562.5                   | (He et al., 2015; Li et al., 2019)                                                                |
| KA087 | 3'-Hydroxykushenol O                                                            | NR                                              | NR              | NR                      | (He et al., 2015)                                                                                 |
| KA088 | Ononin                                                                          | C <sub>22</sub> H <sub>22</sub> O <sub>9</sub>  | 442813          | 430.4                   | (He et al., 2015)                                                                                 |
| KA089 | Pseudobatigenin                                                                 | C <sub>16</sub> H <sub>10</sub> O <sub>5</sub>  | NR #            | 282.25                  | (He et al., 2015)                                                                                 |
| KA090 | Pseudobatigenin-7-O-β-D-xylose-(1→6)-β-D-glucopyranoside                        | C <sub>27</sub> H <sub>24</sub> O <sub>14</sub> | NR #            | 576.51                  | (He et al., 2015)                                                                                 |
| KA091 | Daidzein-7-O-β-D-xylose-(1→6)-β-D-glucopyranoside                               | C <sub>26</sub> H <sub>28</sub> O <sub>13</sub> | NR #            | 548.5                   | (He et al., 2015)                                                                                 |
| KA092 | 3'-Methoxy-4'-hydroxyisoflavone-7-O-β-D-xylose-(1→6)-β-D-glucopyranoside        | C <sub>27</sub> H <sub>30</sub> O <sub>14</sub> | NR #            | 578.52                  | (He et al., 2015)                                                                                 |
| KA093 | 3'-Hydroxy-4'-methoxyisoflavone-7-O-β-D-xylopyranosyl-(1→6)-β-D-glucopyranoside | C <sub>27</sub> H <sub>30</sub> O <sub>14</sub> | NR #            | 578.52                  | (He et al., 2015)                                                                                 |

| No.   | Derivatives and Constituents                                                    | Molecular Formula                               | PubChem CID/SID | Molecule Weight (g/mol) | References          |
|-------|---------------------------------------------------------------------------------|-------------------------------------------------|-----------------|-------------------------|---------------------|
| KA094 | 3'-Hydroxy-4'-methoxyisoflavone-7-O-β-D-apiofuranosyl-(1→6)-β-D-glucopyranoside | C <sub>27</sub> H <sub>30</sub> O <sub>14</sub> | NR #            | 578.52                  | (He et al., 2015)   |
| KA095 | 3'-Methoxy-4'-hydroxyisoflavone-7-O-β-D-apiose-(1-6)-β-D-glucopyranoside        | C <sub>27</sub> H <sub>30</sub> O <sub>14</sub> | NR #            | 578.52                  | (He et al., 2015)   |
| KA096 | 4'-Hydroxy-3'-methoxyisoflavone-7-O-β-D-xylopyranosyl-(1→6)-β-D-glucopyranoside | C <sub>27</sub> H <sub>30</sub> O <sub>14</sub> | NR #            | 578.52                  | (He et al., 2015)   |
| KA097 | 4'-Hydroxy-3'-methoxyisoflavone-7-O-β-D-apiofuranosyl-(1→6)-β-D-glucopyranoside | C <sub>27</sub> H <sub>30</sub> O <sub>14</sub> | NR #            | 578.52                  | (He et al., 2015)   |
| KA098 | 4'-Hydroxyisoflavone-7-O-β-D-apiose-(1→6)-β-D-glucopyranoside                   | C <sub>26</sub> H <sub>28</sub> O <sub>13</sub> | NR #            | 548.5                   | (He et al., 2015)   |
| KA099 | 4'-Methoxyisoflavone-7-O-β-D-apiose-(1→6) - β-D-glucopyranoside                 | C <sub>27</sub> H <sub>30</sub> O <sub>13</sub> | NR #            | 562.52                  | (He et al., 2015)   |
| KA100 | 3',4'-Methylenedioxyisoflavone-7-O-β-D-apiofuranosyl-(1→6)-β-D-glucopyranoside  | C <sub>27</sub> H <sub>28</sub> O <sub>14</sub> | NR #            | 576.51                  | (He et al., 2015)   |
| KA101 | 3',4'-Dihydroxy-isoflavone-7-O-β-D-glucopyranoside                              | C <sub>21</sub> H <sub>20</sub> O <sub>10</sub> | NR #            | 632.38                  | (He et al., 2015)   |
| KA102 | 5-Hydroxy-4'-methoxyisoflavone-7-O-β-D-xylose-(1→6)-β-D-glucopyranoside         | C <sub>27</sub> H <sub>30</sub> O <sub>14</sub> | NR #            | 578.52                  | (He et al., 2015)   |
| KA103 | 5-Hydroxy-4'-methoxyisoflavone-7-O-β-D-apiose-(1→6)-β-D-glucopyranoside         | C <sub>27</sub> H <sub>30</sub> O <sub>14</sub> | NR #            | 578.52                  | (He et al., 2015)   |
| KA104 | 5'-Hydroxy-4'-methoxyisoflavone-2'-β-D-glucopyranoside                          | C <sub>22</sub> H <sub>22</sub> O <sub>12</sub> | NR #            | 478.41                  | (He et al., 2015)   |
| KA105 | 5,4'-Dihydroxy-isoflavone-7-O-β-D-xylose-(1→6)-β-D-glucopyranoside              | C <sub>26</sub> H <sub>28</sub> O <sub>14</sub> | NR #            | 564.5                   | (He et al., 2015)   |
| KA106 | Calycosin-7-glucoside                                                           | C <sub>22</sub> H <sub>22</sub> O <sub>10</sub> | 71571502        | 446.4                   | (Weng et al., 2018) |
| KA107 | 4'-Hydroxyisoflavone-7-O-β-D-xylose-(1→6)-glucopyranoside                       | C <sub>26</sub> H <sub>28</sub> O <sub>13</sub> | NR #            | 548.5                   | (Zhao, 2015)        |
| KA108 | 5,7,2',5'-Tetrahydroxy-4'-methoxy-6-lavandulyl-8-(3-methyl-2-butene)-isoflavone | C <sub>31</sub> H <sub>38</sub> O <sub>7</sub>  | NR #            | 522.64                  | (Zhao, 2015)        |
| KA109 | 5,7,4'-Trihydroxy-3'-methoxy-6,5'-di(γ,γ-dimethylallyl)-isoflavone              | C <sub>26</sub> H <sub>30</sub> O <sub>6</sub>  | NR #            | 438.52                  | (Zhao, 2015)        |

| No.   | Derivatives and Constituents                                                    | Molecular Formula                               | PubChem CID/SID | Molecule Weight (g/mol) | References                                                                 |
|-------|---------------------------------------------------------------------------------|-------------------------------------------------|-----------------|-------------------------|----------------------------------------------------------------------------|
| KA110 | 5,7-Dimethoxy-4',5',-methylenedioxy-8,3'-di(3-methy-4-hydroxy-2-buten)flavanone | C <sub>28</sub> H <sub>32</sub> O <sub>6</sub>  | NR #            | 464.56                  | (Zhao, 2015)                                                               |
| KA111 | 5-Methoxykushenol C                                                             | NR                                              | NR              | NR                      | (Li et al., 2019)                                                          |
| KA112 | 7-Hydroxy-3''-methoxyisoflavone-7-primeveroside                                 | NR                                              | NR              | NR                      | (Li et al., 2019)                                                          |
| KA113 | Kakkanin                                                                        | C <sub>27</sub> H <sub>30</sub> O <sub>14</sub> | 273966287       | 578.5                   | (Zhao, 2015)                                                               |
| KA114 | Orobol                                                                          | C <sub>15</sub> H <sub>10</sub> O <sub>6</sub>  | 5281801         | 286.24                  | (Zhao, 2015)                                                               |
| KA115 | Pseudobatifigenin-7-O-β-D-apiofuranosyl-(1→6)-β-D-glucopyranosid                | C <sub>27</sub> H <sub>28</sub> O <sub>14</sub> | NR #            | 576.51                  | (Zhao, 2015)                                                               |
| KA116 | Pseudobatioenin                                                                 | C <sub>16</sub> H <sub>12</sub> O <sub>5</sub>  | NR #            |                         | (Zhao, 2015)                                                               |
| KA117 | 7-Hydroxy-4'-hydroxyisoflavonone-3'-O-β-D-glucopyranoside                       | NR                                              | NR              | NR                      | (He et al., 2015)                                                          |
| KA118 | 2,3-Dihydroxy-4'-methoxyisoflavonone-7-O-β-D-xylose-(1→6)-β-D-glucopyranoside   | NR                                              | NR              | NR                      | (He et al., 2015)                                                          |
| KA119 | 2,3-Dihydroxy-4'-methoxyisoflavonone-7-O-β-D-apiose-(1→6)-β-D-glucopyranoside   | NR                                              | NR              | NR                      | (He et al., 2015)                                                          |
| KA120 | Medicarpin                                                                      | C <sub>16</sub> H <sub>14</sub> O <sub>4</sub>  | 336327          | 270.28                  | (Takahashi et al., 2016)                                                   |
| KA121 | 5-Methoxy-isoflavone-7-O-β-D-glucopyranoside                                    | C <sub>22</sub> H <sub>22</sub> O <sub>9</sub>  | NR #            | 430.41                  | (Zhao, 2015)                                                               |
| KA122 | 5-Methoxy-isoflavone-7-di-O-β-D-glucopyranoside                                 | C <sub>28</sub> H <sub>32</sub> O <sub>14</sub> | NR #            | 592.55                  | (Zhao, 2015)                                                               |
| KA123 | Genistein-7-rutinoside                                                          | NR                                              | NR              | NR                      | (Zhao, 2015)                                                               |
| KA124 | 2,3,4'-Trihydroxy-homoisoflavone-7-O-β-D-glucopyranoside                        | NR                                              | NR              | NR                      | (He et al., 2015)                                                          |
| KA125 | 2,3-Dihydroxy-4'-methoxyhomoisoflavone-7-O-xyloside                             | NR                                              | NR              | NR                      | (He et al., 2015)                                                          |
| KA126 | 2',4-Dihydroxy-4',6'-dimethoxychalcone                                          | C <sub>17</sub> H <sub>16</sub> O <sub>5</sub>  | 277363800       | 300.3                   | (He et al., 2015)                                                          |
| KA127 | Kuraridin                                                                       | C <sub>26</sub> H <sub>30</sub> O <sub>6</sub>  | 9954815         | 438.5                   | (He et al., 2015; Li et al., 2019; Sun et al., 2017; Z. Yang et al., 2016) |
| KA128 | Kuraridinol                                                                     | C <sub>26</sub> H <sub>32</sub> O <sub>7</sub>  | 5318880         | 456.5                   | (He et al., 2015; Li et al., 2019)                                         |
| KA129 | Kushenol D                                                                      | C <sub>27</sub> H <sub>32</sub> O <sub>6</sub>  | 5318893         | 452.5                   | (He et al., 2015; Li et al., 2019)                                         |
| KA130 | Xanthohumol                                                                     | C <sub>21</sub> H <sub>22</sub> O <sub>5</sub>  | 639665          | 354.4                   | (He et al., 2015; Li et al., 2019; Sun et al., 2017; Q. Wang et al., 2017) |

| No.   | Derivatives and Constituents                                                              | Molecular Formula                               | PubChem CID/SID | Molecule Weight (g/mol) | References                                                                                                                         |
|-------|-------------------------------------------------------------------------------------------|-------------------------------------------------|-----------------|-------------------------|------------------------------------------------------------------------------------------------------------------------------------|
| KA131 | Cyclokurarinidin                                                                          | C <sub>26</sub> H <sub>30</sub> O <sub>6</sub>  | 16083181        | 438.5                   | (He et al., 2015)                                                                                                                  |
| KA132 | (Z)-4,2',4'-trihydroxy chalcone                                                           | C <sub>15</sub> H <sub>12</sub> O <sub>4</sub>  | NR #            | 256.26                  | (He et al., 2015)                                                                                                                  |
| KA133 | Sophflavone A                                                                             | C <sub>52</sub> H <sub>58</sub> O <sub>12</sub> | NR #            | 875.02                  | (He et al., 2015)                                                                                                                  |
| KA134 | Sophflavone B                                                                             | C <sub>52</sub> H <sub>56</sub> O <sub>12</sub> | NR #            | 873.01                  | (He et al., 2015)                                                                                                                  |
| KA135 | Kushecarpin A                                                                             | C <sub>17</sub> H <sub>18</sub> O <sub>6</sub>  | 272895690       | 318.32                  | (He et al., 2015)                                                                                                                  |
| KA136 | Kushecarpin B                                                                             | C <sub>18</sub> H <sub>18</sub> O <sub>7</sub>  | 272895691       | 346.3                   | (He et al., 2015)                                                                                                                  |
| KA137 | Kushecarpin C                                                                             | C <sub>17</sub> H <sub>16</sub> O <sub>7</sub>  | 272895692       | 332.3                   | (He et al., 2015)                                                                                                                  |
| KA138 | Kushecarpin D                                                                             | C <sub>16</sub> H <sub>14</sub> O <sub>6</sub>  | 275167221       | 302.28                  | (He et al., 2015)                                                                                                                  |
| KA139 | Maackiain                                                                                 | C <sub>16</sub> H <sub>12</sub> O <sub>5</sub>  | 91510           | 284.26                  | (He et al., 2015; Q. Huang et al., 2017; Lee et al., 2018; Li et al., 2019; Takahashi et al., 2016; Weng et al., 2018; Zhao, 2015) |
| KA140 | 4-Methoxy-maackiain                                                                       | NR                                              | NR              | NR                      | (He et al., 2015)                                                                                                                  |
| KA141 | Maackiain-7-O-β-D-apiose-(1→6)-β-D-glucopyranoside                                        | NR                                              | NR              | NR                      | (He et al., 2015)                                                                                                                  |
| KA142 | Pterocarpin                                                                               | C <sub>17</sub> H <sub>14</sub> O <sub>5</sub>  | 1715306         | 298.29                  | (He et al., 2015)                                                                                                                  |
| KA143 | 3-hydroxy-4-methoxy-8,9-methylenedioxypterocarpan                                         | NR                                              | NR              | NR                      | (He et al., 2015)                                                                                                                  |
| KA144 | Trifolirhizin                                                                             | C <sub>22</sub> H <sub>22</sub> O <sub>10</sub> | 442827          | 446.4                   | (He et al., 2015; Q. Huang et al., 2017; Sun et al., 2017; Weng et al., 2018; Z. Yang et al., 2016)                                |
| KA145 | Trifolirhizin-6'-monoacetate                                                              | C <sub>24</sub> H <sub>24</sub> O <sub>11</sub> | 44257443        | 488.4                   | (He et al., 2015; Q. Huang et al., 2017; Zhao, 2015)                                                                               |
| KA146 | Kushenin                                                                                  | C <sub>16</sub> H <sub>14</sub> O <sub>5</sub>  | 5318889         | 286.28                  | (He et al., 2015)                                                                                                                  |
| KA147 | Medicarpin-3-O-β-D-apiose-(1→6)-β-D- glucopyranoside                                      | NR                                              | NR              | NR                      | (He et al., 2015)                                                                                                                  |
| KA148 | Sophoraflavanone M                                                                        | C <sub>20</sub> H <sub>20</sub> O <sub>5</sub>  | NR #            | 340.38                  | (Ma et al., 2019)                                                                                                                  |
| KA149 | Sophoraflavanone N                                                                        | C <sub>25</sub> H <sub>28</sub> O <sub>5</sub>  | NR #            | 408.49                  | (Ma et al., 2019)                                                                                                                  |
| KA150 | Glabranin                                                                                 | C <sub>20</sub> H <sub>20</sub> O <sub>4</sub>  | 124049          | 324.4                   | (Ma et al., 2019)                                                                                                                  |
| KA151 | (2S)-7-hydroxy-5-methoxy-8-prenylflavanone                                                | C <sub>21</sub> H <sub>22</sub> O <sub>4</sub>  | NR #            | 338.4                   | (Ma et al., 2019)                                                                                                                  |
| KA152 | (2S)-8-[2-(3-hydroxyisopropyl)-5-methyl-4- hexenyl]-2'-methoxy-5,7,4'-trihydroxyflavanone | C <sub>26</sub> H <sub>32</sub> O <sub>7</sub>  | NR #            | 456.54                  | (Ma et al., 2019)                                                                                                                  |

| No.       | Derivatives and Constituents                                   | Molecular Formula                               | PubChem CID/SID | Molecule Weight (g/mol) | References              |
|-----------|----------------------------------------------------------------|-------------------------------------------------|-----------------|-------------------------|-------------------------|
| KA153     | Leachianone B                                                  | C <sub>26</sub> H <sub>30</sub> O <sub>6</sub>  | 15719490        | 438.5                   | (Ma et al., 2019)       |
| KA154     | 3,7-Dihydroxycoumarin                                          | C <sub>9</sub> H <sub>6</sub> O <sub>4</sub>    | 6918810         | 178.14                  | (R. Huang et al., 2017) |
| KA155     | 8-(3-Hydroxymethyl-2-butenyl)-5,7,2',4'-tetrahydroxy-flavanone | C <sub>20</sub> H <sub>20</sub> O <sub>7</sub>  | NR #            | 372.37                  | (R. Huang et al., 2017) |
| KA156     | 8-Lavandulyl-5,7,4'-trihydroxyflavonol                         | C <sub>25</sub> H <sub>26</sub> O <sub>6</sub>  | NR #            | 422.48                  | (Q. Huang et al., 2017) |
| KA157     | 8-Prenylnaringenin                                             | C <sub>20</sub> H <sub>20</sub> O <sub>5</sub>  | 480764          | 340.4                   | (Kim et al., 2018)      |
| KA158     | Luteolin                                                       | C <sub>15</sub> H <sub>10</sub> O <sub>6</sub>  | 5280445         | 286.24                  | (Weng et al., 2018)     |
| KA159     | Daidzin                                                        | C <sub>21</sub> H <sub>20</sub> O <sub>9</sub>  | 107971          | 416.4                   | (Weng et al., 2018)     |
| KA160     | Luteoloside                                                    | C <sub>21</sub> H <sub>20</sub> O <sub>11</sub> | 162188761       | 448.4                   | (Weng et al., 2018)     |
| KA161     | Isoquercitrin                                                  | C <sub>21</sub> H <sub>20</sub> O <sub>12</sub> | 5280804         | 464.4                   | (Weng et al., 2018)     |
| KA162     | Myricetin                                                      | C <sub>15</sub> H <sub>10</sub> O <sub>8</sub>  | 5281672         | 318.23                  | (Weng et al., 2018)     |
| KA163     | (2R)-3 $\alpha$ ,7,4'-Trihydroxy-5-methoxy-8-prenylflavanone   | C <sub>21</sub> H <sub>22</sub> O <sub>6</sub>  | NR #            | 370.4                   | (R. Huang et al., 2017) |
| KA164     | (2R)-3 $\beta$ ,7,4'-Trihydroxy-5-methoxy-8-prenylflavanone    | C <sub>21</sub> H <sub>22</sub> O <sub>6</sub>  | NR #            | 370.4                   | (R. Huang et al., 2017) |
| KA165     | Shandougenines B                                               | C <sub>30</sub> H <sub>18</sub> O <sub>10</sub> | NR #            | 538.46                  | (R. Huang et al., 2017) |
| KA166     | Specionin                                                      | C <sub>20</sub> H <sub>26</sub> O <sub>8</sub>  | 10982109        | 394.4                   | (R. Huang et al., 2017) |
| KA167     | 2'-Hydroxyisoxanthohumol                                       | C <sub>21</sub> H <sub>22</sub> O <sub>6</sub>  | NR              | 370.4                   | (Li et al., 2019)       |
| KA168     | Euchrestaflavanone A                                           | C <sub>25</sub> H <sub>28</sub> O <sub>5</sub>  | 484588          | 408.5                   | (Zhao, 2015)            |
| KA169     | Exiguaflavanone B                                              | C <sub>26</sub> H <sub>30</sub> O <sub>6</sub>  | 10455800        | 438.5                   | (Zhao, 2015)            |
| KA170     | Exiguaflavanone K                                              | C <sub>21</sub> H <sub>22</sub> O <sub>6</sub>  | 11036041        | 370.4                   | (Zhao, 2015)            |
| KA171     | Diosmetin                                                      | C <sub>16</sub> H <sub>12</sub> O <sub>6</sub>  | 5281612         | 300.26                  | (Zhao, 2015)            |
| KA172     | 7,3'-Dihydroxy-4'-methoxyflavone                               | C <sub>16</sub> H <sub>12</sub> O <sub>5</sub>  | 5378220         | 284.26                  | (Zhao, 2015)            |
| KA173     | 6"-Apioside-genistin                                           | C <sub>26</sub> H <sub>28</sub> O <sub>14</sub> | NR #            | 564.5                   | (Zhao, 2015)            |
| KA174     | Kurarinol C                                                    | C <sub>25</sub> H <sub>26</sub> O <sub>7</sub>  | NR #            | 438.48                  | (Zhao, 2015)            |
| KA175     | Kurarinol O                                                    | C <sub>27</sub> H <sub>30</sub> O <sub>14</sub> | NR #            | 578.52                  | (Zhao, 2015)            |
| KA176     | Genistin                                                       | C <sub>21</sub> H <sub>20</sub> O <sub>10</sub> | 5281377         | 432.4                   | (Zhao, 2015)            |
| KA177     | Genistein                                                      | C <sub>15</sub> H <sub>10</sub> O <sub>5</sub>  | 5280961         | 270.24                  | (Zhao, 2015)            |
| KA178     | Desmethylxanthohumol                                           | C <sub>20</sub> H <sub>20</sub> O <sub>5</sub>  | 6443339         | 340.4                   | (Li et al., 2019)       |
| KA179     | Trifolirhizin-6"-O-malonate                                    | C <sub>25</sub> H <sub>24</sub> O <sub>13</sub> | 14841223        | 532.4                   | (Zhao, 2015)            |
| <b>KB</b> | <b>Alkaloids (n=50)</b>                                        |                                                 |                 |                         |                         |

| No.   | Derivatives and Constituents                | Molecular Formula                                             | PubChem CID/SID | Molecule Weight (g/mol) | References                                                                                                                                                                                                                                                                                                            |
|-------|---------------------------------------------|---------------------------------------------------------------|-----------------|-------------------------|-----------------------------------------------------------------------------------------------------------------------------------------------------------------------------------------------------------------------------------------------------------------------------------------------------------------------|
| KB001 | Matrine                                     | C <sub>15</sub> H <sub>24</sub> N <sub>2</sub> O              | 91466           | 248.36                  | (Chen et al., 2017; Guan et al., 2015; Hao et al., 2017; He et al., 2015; Ji et al., 2017; Li et al., 2019; Sun et al., 2017; B. Wang et al., 2018; C. Wang et al., 2017; Wu et al., 2017; Wu, 2016; Y. Yang et al., 2016; R. Zhang et al., 2016; Zhang et al., 2015; Y. B. Zhang et al., 2016; D. Zhao et al., 2018) |
| KB002 | Isomatrine                                  | C <sub>15</sub> H <sub>24</sub> N <sub>2</sub> O              | 5271984         | 248.36                  | (He et al., 2015)                                                                                                                                                                                                                                                                                                     |
| KB003 | (+)-Allomatrine                             | C <sub>15</sub> H <sub>24</sub> N <sub>2</sub> O              | 7000681         | 248.36                  | (He et al., 2015)                                                                                                                                                                                                                                                                                                     |
| KB004 | Cis-neomatrine                              | C <sub>15</sub> H <sub>24</sub> N <sub>2</sub> O              | 273503408       | 248.36                  | (He et al., 2015)                                                                                                                                                                                                                                                                                                     |
| KB005 | Trans-neomatrine                            | C <sub>15</sub> H <sub>24</sub> N <sub>2</sub> O              | 273503409       | 248.36                  | (He et al., 2015)                                                                                                                                                                                                                                                                                                     |
| KB006 | (-)-9 $\alpha$ -Hydroxy-7,11-dehydromatrine | C <sub>15</sub> H <sub>22</sub> N <sub>2</sub> O <sub>2</sub> | NR #            | 262.35                  | (He et al., 2015)                                                                                                                                                                                                                                                                                                     |
| KB007 | Oxymatrine                                  | C <sub>15</sub> H <sub>24</sub> N <sub>2</sub> O <sub>2</sub> | 114850          | 264.36                  | (Chen et al., 2017; Guan et al., 2015; Hao et al., 2017; He et al., 2015; Li et al., 2019; Sun et al., 2017; C. Wang et al., 2017; Wu, 2016; Y. Yang et al., 2016; Q. Zhang, J. Yu, L. Zhang, et al., 2016; Zhang et al., 2015; D. Zhao et al., 2018; Zhao, 2015)                                                     |
| KB008 | (+)-9 $\alpha$ -Hydroxymatrine              | C <sub>15</sub> H <sub>24</sub> N <sub>2</sub> O <sub>2</sub> | 103481335       | 264.36                  | (He et al., 2015; D. Zhao et al., 2018)                                                                                                                                                                                                                                                                               |
| KB009 | (-)-14 $\beta$ -Hydroxymatrine              | C <sub>15</sub> H <sub>24</sub> N <sub>2</sub> O <sub>2</sub> | 274945414       | 264.36                  | (He et al., 2015)                                                                                                                                                                                                                                                                                                     |
| KB010 | (+)-Sophoranol                              | C <sub>15</sub> H <sub>24</sub> N <sub>2</sub> O <sub>2</sub> | 12442899        | 264.36                  | (He et al., 2015; Ji et al., 2017; D. Zhao et al., 2018)                                                                                                                                                                                                                                                              |
| KB011 | (+)-Sophoranol N-oxide                      | NR                                                            | NR              | NR                      | (He et al., 2015)                                                                                                                                                                                                                                                                                                     |
| KB012 | (+)-Oxysophoranol N-oxide                   | NR                                                            | NR              | NR                      | (He et al., 2015)                                                                                                                                                                                                                                                                                                     |
| KB013 | 13,14-Dehydroxysophoridine                  | C <sub>15</sub> H <sub>24</sub> N <sub>2</sub> O              | NR #            | 248.36                  | (He et al., 2015)                                                                                                                                                                                                                                                                                                     |

| No.   | Derivatives and Constituents            | Molecular Formula                                             | PubChem CID/SID | Molecule Weight (g/mol) | References                                                                                                                                                               |
|-------|-----------------------------------------|---------------------------------------------------------------|-----------------|-------------------------|--------------------------------------------------------------------------------------------------------------------------------------------------------------------------|
| KB014 | (-)-Sophocarpine                        | C <sub>15</sub> H <sub>22</sub> N <sub>2</sub> O              | 115269          | 246.35                  | (He et al., 2015; Ji et al., 2017; Li et al., 2019; Sun et al., 2017; C. Wang et al., 2017; Wu et al., 2017; Zhang et al., 2015; D. Zhao et al., 2018; Zhao, 2015)       |
| KB015 | Oxysophocarpine                         | C <sub>15</sub> H <sub>22</sub> N <sub>2</sub> O <sub>2</sub> | 24721085        | 262.35                  | (He et al., 2015; Ji et al., 2017; Li et al., 2019; C. Wang et al., 2017; Q. Zhang, J. Yu, L. Zhang, et al., 2016; Zhang et al., 2015; D. Zhao et al., 2018; Zhao, 2015) |
| KB016 | Sophocarpine, N-oxide                   | C <sub>15</sub> H <sub>22</sub> N <sub>2</sub> O <sub>2</sub> | 250098840       | 262.35                  | (He et al., 2015)                                                                                                                                                        |
| KB017 | (-)-9 $\alpha$ -Hydroxysophocarpine     | C <sub>15</sub> H <sub>24</sub> N <sub>2</sub> O              | 355353482       | 248.36                  | (Li et al., 2019)                                                                                                                                                        |
| KB018 | 9 $\alpha$ -Hydroxysophocarpine N-oxide | NR                                                            | NR              | NR                      | (He et al., 2015)                                                                                                                                                        |
| KB019 | (+)-12 $\alpha$ -Hydroxysophocarpine    | C <sub>15</sub> H <sub>22</sub> N <sub>2</sub> O <sub>2</sub> | 44408595        | 262.35                  | (He et al., 2015)                                                                                                                                                        |
| KB020 | Sophoramine                             | C <sub>15</sub> H <sub>20</sub> N <sub>2</sub> O              | 169014          | 244.33                  | (He et al., 2015; Li et al., 2019; Sun et al., 2017)                                                                                                                     |
| KB021 | (-)-13-Ethylsophoramine                 | NR                                                            | NR              | NR                      | (He et al., 2015)                                                                                                                                                        |
| KB022 | Tetrahydroneosophoramine                | NR                                                            | NR              | NR                      | (He et al., 2015)                                                                                                                                                        |
| KB023 | (-)-Cytisine                            | C <sub>11</sub> H <sub>14</sub> N <sub>2</sub> O              | 10235           | 190.24                  | (He et al., 2015; Li et al., 2019; Zhao, 2015)                                                                                                                           |
| KB024 | N-Methylcytisine                        | C <sub>12</sub> H <sub>16</sub> N <sub>2</sub> O              | 670971          | 204.27                  | (He et al., 2015; Li et al., 2019; Sun et al., 2017; Zhang et al., 2015; Zhao, 2015)                                                                                     |
| KB025 | (-)-Baptifoline                         | C <sub>15</sub> H <sub>20</sub> N <sub>2</sub> O <sub>2</sub> | 621307          | 260.33                  | (He et al., 2015; Li et al., 2019; Sun et al., 2017; Zhao, 2015)                                                                                                         |
| KB026 | (-)-Anagryne                            | C <sub>15</sub> H <sub>20</sub> N <sub>2</sub> O              | 10246           | 244.33                  | (He et al., 2015; Sun et al., 2017; D. Zhao et al., 2018; Zhao, 2015)                                                                                                    |
| KB027 | Flavascensine                           | C <sub>12</sub> H <sub>20</sub> N <sub>2</sub> O              | NR #            | 208.31                  | (He et al., 2015)                                                                                                                                                        |
| KB028 | 2-Oxymatrine                            | C <sub>15</sub> H <sub>22</sub> N <sub>2</sub> O <sub>2</sub> | NR #            | 262.35                  | (Y. B. Zhang et al., 2016)                                                                                                                                               |



| No.       | Derivatives and Constituents       | Molecular Formula                                             | PubChem CID/SID | Molecule Weight (g/mol) | References                                                                                                       |
|-----------|------------------------------------|---------------------------------------------------------------|-----------------|-------------------------|------------------------------------------------------------------------------------------------------------------|
| KB029     | 13,14-Dehydromatrine               | C <sub>15</sub> H <sub>22</sub> N <sub>2</sub> O              | NR #            | 246.35                  | (Y. B. Zhang et al., 2016)                                                                                       |
| KB030     | Flavesine A                        | C <sub>30</sub> H <sub>48</sub> N <sub>4</sub> O <sub>2</sub> | NR #            | 496.74                  | (Y. B. Zhang et al., 2016)                                                                                       |
| KB031     | Flavesine B                        | C <sub>30</sub> H <sub>48</sub> N <sub>4</sub> O <sub>2</sub> | NR #            | 496.74                  | (Y. B. Zhang et al., 2016)                                                                                       |
| KB032     | Flavesine C                        | C <sub>30</sub> H <sub>46</sub> N <sub>4</sub> O <sub>2</sub> | NR #            | 494.72                  | (Y. B. Zhang et al., 2016)                                                                                       |
| KB033     | Flavesine D                        | C <sub>30</sub> H <sub>44</sub> N <sub>4</sub> O <sub>2</sub> | NR #            | 492.71                  | (Y. B. Zhang et al., 2016)                                                                                       |
| KB034     | Flavesine E                        | C <sub>30</sub> H <sub>46</sub> N <sub>4</sub> O <sub>2</sub> | NR #            | 494.72                  | (Y. B. Zhang et al., 2016)                                                                                       |
| KB035     | Flavesine F                        | C <sub>26</sub> H <sub>36</sub> N <sub>4</sub> O <sub>2</sub> | NR #            | 436.6                   | (Y. B. Zhang et al., 2016)                                                                                       |
| KB036     | Sophoridine                        | C <sub>15</sub> H <sub>24</sub> N <sub>2</sub> O              | 165549          | 248.36                  | (Ji et al., 2017; Sun et al., 2017; R. Zhang et al., 2016; Zhang et al., 2015; D. Zhao et al., 2018; Zhao, 2015) |
| KB037     | (+)-Cytisine                       | C <sub>11</sub> H <sub>14</sub> N <sub>2</sub> O              | NR              | 190.25                  | (Li et al., 2019)                                                                                                |
| KB038     | 17β-Hydroxysophoridine             | C <sub>15</sub> H <sub>24</sub> N <sub>2</sub> O <sub>2</sub> | NR #            | 264.36                  | (D. Zhao et al., 2018)                                                                                           |
| KB039     | 7,11-Dehydromatrine                | C <sub>15</sub> H <sub>22</sub> N <sub>2</sub> O              | 5316459         | 246.35                  | (Li et al., 2019)                                                                                                |
| KB040     | (+)-Epilamprolobine N-oxide        | C <sub>15</sub> H <sub>24</sub> N <sub>2</sub> O <sub>3</sub> | 274291215       | 280.36                  | (Zhao, 2015)                                                                                                     |
| KB041     | Oxysophoridine                     | C <sub>15</sub> H <sub>24</sub> N <sub>2</sub> O <sub>2</sub> | 7061140         | 264.36                  | (Li et al., 2019; Zhao, 2015)                                                                                    |
| KB042     | Oxymamanine                        | C <sub>15</sub> H <sub>22</sub> N <sub>2</sub> O <sub>3</sub> | NR #            | 278.35                  | (Zhao, 2015)                                                                                                     |
| KB043     | (-)-Lehmannine N-oxide             | C <sub>15</sub> H <sub>22</sub> N <sub>2</sub> O <sub>2</sub> | NR #            | 262.35                  | (Zhao, 2015)                                                                                                     |
| KB044     | (+)-5α,9α-Dihydroxymatrine         | C <sub>15</sub> H <sub>24</sub> N <sub>2</sub> O <sub>3</sub> | 50221581        | 280.36                  | (Zhao, 2015)                                                                                                     |
| KB045     | (+)-9β-Hydroxylamprolobine         | C <sub>15</sub> H <sub>24</sub> N <sub>2</sub> O <sub>3</sub> | NR #            | 280.37                  | (Li et al., 2019; Zhao, 2015)                                                                                    |
| KB046     | (+)-9β-Hydroxylamprolobine N-oxide | C <sub>15</sub> H <sub>25</sub> N <sub>2</sub> O <sub>4</sub> | NR #            | 296.37                  | (Zhao, 2015)                                                                                                     |
| KB047     | Mamanine                           | C <sub>15</sub> H <sub>22</sub> N <sub>2</sub> O <sub>2</sub> | 323274          | 262.35                  | (Zhao, 2015)                                                                                                     |
| KB048     | (+)-Sophoranol N-oxide             | C <sub>15</sub> H <sub>24</sub> N <sub>2</sub> O <sub>3</sub> | NR              | 280.37                  | (Li et al., 2019; Zhao, 2015)                                                                                    |
| KB049     | 5α,9α-Isodihydroxymatrine          | C <sub>15</sub> H <sub>24</sub> N <sub>2</sub> O <sub>3</sub> | NR              | 280.37                  | (Li et al., 2019)                                                                                                |
| KB050     | Liriodenine                        | C <sub>17</sub> H <sub>9</sub> NO <sub>3</sub>                | 10144           | 275.26                  | (Zhao, 2015)                                                                                                     |
| <b>KC</b> | <b>Terpenoids (n=10)</b>           |                                                               |                 |                         |                                                                                                                  |
| KC001     | Lupeol                             | C <sub>30</sub> H <sub>50</sub> O                             | 259846          | 426.7                   | (He et al., 2015)                                                                                                |
| KC002     | Lupenone                           | C <sub>30</sub> H <sub>48</sub> O                             | 92158           | 424.7                   | (He et al., 2015)                                                                                                |
| KC003     | Monogynol B                        | C <sub>30</sub> H <sub>50</sub> O                             | NR #            | 426.7                   | (He et al., 2015)                                                                                                |
| KC004     | β-Amyrenol                         | C <sub>30</sub> H <sub>50</sub> O                             | 73145           | 426.7                   | (He et al., 2015)                                                                                                |
| KC005     | Soyasaponin I                      | C <sub>48</sub> H <sub>78</sub> O <sub>18</sub>               | 122097          | 943.1                   | (He et al., 2015)                                                                                                |

| No.       | Derivatives and Constituents        | Molecular Formula                               | PubChem CID/SID | Molecule Weight (g/mol) | References            |
|-----------|-------------------------------------|-------------------------------------------------|-----------------|-------------------------|-----------------------|
| KC006     | Sophoraflavoside I                  | C <sub>59</sub> H <sub>96</sub> O <sub>27</sub> | 274478437       | 1237.4                  | (He et al., 2015)     |
| KC007     | Sophoraflavoside II                 | C <sub>48</sub> H <sub>76</sub> O <sub>20</sub> | 274198996       | 973.1                   | (He et al., 2015)     |
| KC008     | Sophoraflavoside III                | C <sub>53</sub> H <sub>84</sub> O <sub>24</sub> | 274198997       | 1105.2                  | (He et al., 2015)     |
| KC009     | Sophoraflavoside IV                 | C <sub>59</sub> H <sub>94</sub> O <sub>29</sub> | 135229963       | 1267.4                  | (He et al., 2015)     |
| KC010     | Sophopterocarpan A                  | C <sub>16</sub> H <sub>16</sub> O <sub>6</sub>  | 355426221       | 304.29                  | (H. Zhu et al., 2017) |
| <b>KD</b> | <b>Lignans (n=3)</b>                |                                                 |                 |                         |                       |
| KD001     | Citrusin A                          | C <sub>26</sub> H <sub>34</sub> O <sub>12</sub> | 131752579       | 538.5                   | (He et al., 2015)     |
| KD002     | Citrusin B                          | C <sub>27</sub> H <sub>36</sub> O <sub>13</sub> | 131752580       | 568.6                   | (He et al., 2015)     |
| KD003     | Alaschanioside A                    | NR                                              | NR              | NR                      | (He et al., 2015)     |
| <b>KE</b> | <b>Dibenzoyl derivatives (n=12)</b> |                                                 |                 |                         |                       |
| KE001     | Sophodibenzoside A                  | C <sub>26</sub> H <sub>30</sub> O <sub>15</sub> | 275217506       | 582.5                   | (He et al., 2015)     |
| KE002     | Sophodibenzoside B                  | C <sub>26</sub> H <sub>30</sub> O <sub>15</sub> | 275217507       | 582.5                   | (He et al., 2015)     |
| KE003     | Sophodibenzoside C                  | C <sub>21</sub> H <sub>22</sub> O <sub>11</sub> | NR #            | 450.4                   | (He et al., 2015)     |
| KE004     | Sophodibenzoside D                  | C <sub>26</sub> H <sub>30</sub> O <sub>14</sub> | NR #            | 566.51                  | (He et al., 2015)     |
| KE005     | Sophodibenzoside E                  | C <sub>26</sub> H <sub>30</sub> O <sub>14</sub> | NR #            | 566.51                  | (He et al., 2015)     |
| KE006     | Sophodibenzoside F                  | C <sub>21</sub> H <sub>22</sub> O <sub>10</sub> | NR #            | 434.4                   | (He et al., 2015)     |
| KE007     | Sophodibenzoside G                  | C <sub>26</sub> H <sub>28</sub> O <sub>15</sub> | NR #            | 580.5                   | (He et al., 2015)     |
| KE008     | Sophodibenzoside H                  | C <sub>26</sub> H <sub>28</sub> O <sub>15</sub> | NR #            | 580.5                   | (He et al., 2015)     |
| KE009     | Sophodibenzoside I                  | C <sub>21</sub> H <sub>20</sub> O <sub>11</sub> | NR #            | 448.38                  | (He et al., 2015)     |
| KE010     | Sophodibenzoside J                  | C <sub>26</sub> H <sub>30</sub> O <sub>15</sub> | NR #            | 582.51                  | (He et al., 2015)     |
| KE011     | Sophodibenzoside K                  | C <sub>21</sub> H <sub>22</sub> O <sub>11</sub> | NR #            | 450.4                   | (He et al., 2015)     |
| KE012     | Sophodibenzoside L                  | C <sub>25</sub> H <sub>28</sub> O <sub>15</sub> | NR #            | 568.48                  | (He et al., 2015)     |
| <b>KF</b> | <b>Phenolic acids (n=7)</b>         |                                                 |                 |                         |                       |
| KF001     | 2,4-Dihydroxy benzoic acid          | C <sub>7</sub> H <sub>6</sub> O <sub>4</sub>    | 1491            | 154.12                  | (He et al., 2015)     |
| KF002     | T-cinnamic acid                     | C <sub>9</sub> H <sub>8</sub> O <sub>2</sub>    | 444539          | 148.16                  | (Lee et al., 2018)    |
| KF003     | Benzoic acid                        | C <sub>7</sub> H <sub>6</sub> O <sub>2</sub>    | 243             | 122.12                  | (Lee et al., 2018)    |
| KF004     | P-coumaric acid                     | C <sub>9</sub> H <sub>8</sub> O <sub>3</sub>    | 637542          | 164.16                  | (Lee et al., 2018)    |
| KF005     | Caffeic acid                        | C <sub>9</sub> H <sub>8</sub> O <sub>4</sub>    | 689043          | 180.16                  | (Lee et al., 2018)    |
| KF006     | Ferulic acid                        | C <sub>10</sub> H <sub>10</sub> O <sub>4</sub>  | 445858          | 194.18                  | (Lee et al., 2018)    |
| KF007     | Chlorogenic acid                    | C <sub>16</sub> H <sub>18</sub> O <sub>9</sub>  | 1794427         | 354.31                  | (Lee et al., 2018)    |

| No.       | Derivatives and Constituents | Molecular Formula                               | PubChem CID/SID | Molecule Weight (g/mol) | References                                |
|-----------|------------------------------|-------------------------------------------------|-----------------|-------------------------|-------------------------------------------|
| <b>KG</b> | <b>Saponins (n=1)</b>        |                                                 |                 |                         |                                           |
| KG001     | Kaikasaponin II              | C <sub>48</sub> H <sub>78</sub> O <sub>17</sub> | 273966286       | 927.1                   | (Zhao, 2015)                              |
| <b>KH</b> | <b>Fatty acids (n=1)</b>     |                                                 |                 |                         |                                           |
| KH001     | Tetracosanoic acid           | C <sub>24</sub> H <sub>48</sub> O <sub>2</sub>  | 11197           | 368.6                   | (He et al., 2015)                         |
| <b>KI</b> | <b>Coumarins (n=1)</b>       |                                                 |                 |                         |                                           |
| KI001     | Umbelliferone                | C <sub>9</sub> H <sub>6</sub> O <sub>3</sub>    | 5281426         | 162.14                  | (He et al., 2015)                         |
| <b>KJ</b> | <b>Quinones (n=1)</b>        |                                                 |                 |                         |                                           |
| KJ001     | Kushequinone A               | C <sub>17</sub> H <sub>22</sub> O <sub>4</sub>  | NR #            | 290.36                  | (He et al., 2015)                         |
| <b>KK</b> | <b>Sterols (n=1)</b>         |                                                 |                 |                         |                                           |
| KK001     | β-Sitosterol                 | C <sub>29</sub> H <sub>50</sub> O               | 222284          | 414.7                   | (He et al., 2015)                         |
| <b>KL</b> | <b>Polysaccharides (n=7)</b> |                                                 |                 |                         |                                           |
| KL001     | SF1                          | NR                                              | NR              | NR                      | (Q. Zhang, J. Yu, L. Zhang, et al., 2016) |
| KL002     | SF2                          | NR                                              | NR              | NR                      | (Q. Zhang, J. Yu, L. Zhang, et al., 2016) |
| KL003     | SF3                          | NR                                              | NR              | NR                      | (Q. Zhang, J. Yu, L. Zhang, et al., 2016) |
| KL004     | SF4                          | NR                                              | NR              | NR                      | (Q. Zhang, J. Yu, L. Zhang, et al., 2016) |
| KL005     | SFP-100-A                    | NR                                              | NR              | NR                      | (Chen et al., 2018)                       |
| KL006     | SFP-100-B                    | NR                                              | NR              | NR                      | (Chen et al., 2018)                       |
| KL007     | SFP-100-C                    | NR                                              | NR              | NR                      | (Chen et al., 2018)                       |
| <b>KM</b> | <b>Elements (n=4)</b>        |                                                 |                 |                         |                                           |
| KM001     | Cadmium                      | Cd                                              | 23973           | 112.41                  | (Liu et al., 2018)                        |
| KM002     | Copper                       | Cu                                              | 23978           | 63.55                   | (Liu et al., 2018)                        |
| KM003     | Lead                         | Pb                                              | 5352425         | 207.2                   | (Liu et al., 2018)                        |
| KM004     | Zinc                         | Zn                                              | 23994           | 65.38                   | (Liu et al., 2018)                        |

Note: NR: Not reported; Corresponding molecular structures refer to PubChem and Supplementary Figs. S1 to S3 (#) This table was retrieved from our published thesis. Li, H. (2020). *Clinical applications and mechanisms of action of Danggui Beimu Kushen Wan on the targets and pathways implicated in prostate cancer: Literature reviews and computational analyses* [Doctoral dissertation, RMIT University]. RMIT Research Repository. Identification data of each compound, such as LC-MS, HPLC and UPLC-CAD, could refer to corresponding references.

**Supplementary Table S2. Details of identified anti-cancer drugs from 2019 National Comprehensive Cancer Network Clinical Practice Guideline-Prostate Cancer and their drug targets.**

| <b>Treatments and Drug Names</b>       | <b>Drug Targets</b>                                |
|----------------------------------------|----------------------------------------------------|
| <b>1. Androgen deprivation therapy</b> |                                                    |
| Goserelin                              | LHCGR, GNRHR                                       |
| Histrelin                              | GNRHR                                              |
| Leuprolide                             | GNRHR                                              |
| Triptorelin                            | GNRHR                                              |
| Nilutamide                             | AR                                                 |
| Flutamide                              | AR, AHR, NR1I2                                     |
| Bicalutamide                           | AR                                                 |
| Degarelix                              | GNRHR                                              |
| Abiraterone                            | CYP17A1                                            |
| Apalutamide                            | AR                                                 |
| Enzalutamide                           | AR                                                 |
| Ketoconazole                           | AR, CYP17A1, CYP21A2, CYP19A1, KCHN2, NR1I2, NR1I3 |
| <b>2. Chemotherapy</b>                 |                                                    |
| Docetaxel                              | TUBB1, BCL2, MAP2, MAP4, MAPT, NR1I2               |
| Cabazitaxel                            | TUBA4A, TUBB1                                      |
| <b>3. Immunotherapy</b>                |                                                    |
| Sipuleucel-T                           | ACPP                                               |
| Pembrolizumab                          | PDCD1                                              |
| <b>4. Bone health</b>                  |                                                    |
| Denosumab                              | TNFSF11                                            |
| Zoledronic acid                        | FDPS, GGPS1                                        |

Note: ACPP: Acid phosphatase prostate; AHR: Aryl hydrocarbon receptor; AR: Androgen receptor; BCL2: B-cell lymphoma-2; CYP17A1: Cytochrome P450 family 17 subfamily A member 1; CYP21A2: Cytochrome P450 family 21 subfamily A member 2; CYP19A1: Cytochrome P450 family 19 subfamily A member 1; FDPS: Farnesyl diphosphate synthase; GGPS1: Geranylgeranyl diphosphate synthase 1; GNRHR: Gonadotropin releasing hormone receptor; KCNH2: Potassium voltage-gated channel subfamily H member 2; LHCGR: Luteinising hormone/choriogonadotropin receptor; MAP2: Microtubule associated protein 2; MAP4: Microtubule associated protein 4; MAPT: Microtubule associated protein tau; NR1I2: Nuclear receptor subfamily 1 group I member 2; NR1I3: Nuclear receptor subfamily 1 group I member 3; PDCD1: Programmed cell death 1; TNFSF11: Tumour necrosis factor superfamily member 11; TUBA4A: Tubulin alpha 4a; TUBB1: Tubulin beta 1 class VI. Targets were identified from the 2019 National Comprehensive Cancer Network Clinical Practice Guideline-Prostate Cancer (National Comprehensive Cancer Network, 2019).

## Supplementary Table S3. Summary of Kyoto Encyclopedia of Genes and Genomes

### enrichment of the included targets.

| KEGG Term                                             | p-value  | Genes                                                     | Category of KEGG Term               |
|-------------------------------------------------------|----------|-----------------------------------------------------------|-------------------------------------|
| Small cell lung cancer                                | 1.08e-09 | CASP3; PTEN;<br>BCL2; BAX; PTGS2;<br>TP53                 | 6.2 Cancer: specific types          |
| Pathways in cancer                                    | 5.52e-09 | AR; CASP3; PTEN;<br>BCL2; BAX; PTGS2;<br>HIF1A; TP53; IL2 | 6.1 Cancer: overview                |
| Measles                                               | 1.18e-08 | CASP3; IL1B; BCL2;<br>BAX; TP53; IL2                      | 6.9 Infectious disease: viral       |
| p53 signalling pathway                                | 2.12e-08 | CASP3; PTEN;<br>BCL2; BAX; TP53                           | 4.2 Cell growth and death           |
| Kaposi sarcoma-associated herpesvirus infection       | 6.99e-08 | CASP3; BAX;<br>PTGS2; HIF1A;<br>TP53; ICAM1               | 6.9 Infectious disease: viral       |
| Nuclear factor-kappa signalling pathway               | 8.60e-08 | IL1B; BCL2;<br>TNFSF11; PTGS2;<br>ICAM1                   | 3.2 Signal transduction             |
| AGE-RAGE signalling pathway in diabetic complications | 1.11e-07 | CASP3; IL1B; BCL2;<br>BAX; ICAM1                          | 6.7 Endocrine and metabolic disease |
| Human T-cell leukemia virus 1 infection               | 1.84e-07 | FDPS; PTEN; BAX;<br>TP53; IL2; ICAM1                      | 6.9 Infectious disease: viral       |
| Ovarian steroidogenesis                               | 3.26e-07 | LHCGR; PTGS2;<br>CYP19A1; CYP17A1                         | 5.2 Endocrine system                |
| Amyotrophic lateral sclerosis                         | 3.84e-07 | CASP3; BCL2; BAX;<br>TP53                                 | 6.4 Neurodegenerative disease       |
| Apoptosis                                             | 6.64e-07 | CASP3; BCL2; BAX;<br>TP53; TUBA4A                         | 4.2 Cell growth and death           |
| Colorectal cancer                                     | 3.17e-06 | CASP3; BCL2; BAX;<br>TP53                                 | 6.2 Cancer: specific types          |
| Epstein–Barr virus infection                          | 3.55e-06 | CASP3; BCL2; BAX;<br>TP53; ICAM1                          | 6.9 Infectious disease: viral       |
| Prostate cancer                                       | 5.13e-06 | AR; PTEN; BCL2;<br>TP53                                   | 6.2 Cancer: specific types          |
| Human cytomegalovirus infection                       | 6.15e-06 | CASP3; IL1B; BAX;<br>PTGS2; TP53                          | 6.9 Infectious disease: viral       |
| Th17 cell differentiation                             | 7.58e-06 | IL1B; AHR; HIF1A;<br>IL2                                  | 5.1 Immune system                   |
| TNF signalling pathway                                | 8.45e-06 | CASP3; IL1B;<br>PTGS2; ICAM1                              | 3.2 Signal transduction             |
| Sphingolipid signalling pathway                       | 1.15e-05 | PTEN; BCL2; BAX;<br>TP53                                  | 3.2 Signal transduction             |
| Fluid shear stress and atherosclerosis                | 2.13e-05 | IL1B; BCL2; TP53;<br>ICAM1                                | 6.6 Cardiovascular disease          |
| MicroRNAs in cancer                                   | 2.43e-05 | CASP3; PTEN;<br>BCL2; PTGS2; TP53                         | 6.1 Cancer: overview                |
| Breast cancer                                         | 2.65e-05 | PTEN; BAX;<br>TNFSF11; TP53                               | 6.2 Cancer: specific types          |

| <b>KEGG Term</b>                          | <b>p-value</b> | <b>Genes</b>                  | <b>Category of KEGG Term</b>                 |
|-------------------------------------------|----------------|-------------------------------|----------------------------------------------|
| Human papillomavirus infection            | 3.90e-05       | CASP3; PTEN; BAX; PTGS2; TP53 | 6.9 Infectious disease: viral                |
| Hepatitis B                               | 3.98e-05       | CASP3; BCL2; BAX; TP53        | 6.9 Infectious disease: viral                |
| Endometrial cancer                        | 4.49e-05       | PTEN; BAX; TP53               | 6.2 Cancer: specific types                   |
| Steroid hormone biosynthesis              | 4.97e-05       | CYP21A2; CYP19A1; CYP17A1     | 1.3 Lipid metabolism                         |
| Tuberculosis                              | 5.73e-05       | CASP3; IL1B; BCL2; BAX        | 6.8 Infectious disease: bacterial            |
| Central carbon metabolism in cancer       | 6.32e-05       | PTEN; HIF1A; TP53             | 6.1 Cancer: overview                         |
| Prolactin signalling pathway              | 7.88e-05       | LHCGR; TNFSF11; CYP17A1       | 5.2 Endocrine system                         |
| Melanoma                                  | 8.58e-05       | PTEN; BAX; TP53               | 6.2 Cancer: specific types                   |
| Glioma                                    | 9.69e-05       | PTEN; BAX; TP53               | 6.2 Cancer: specific types                   |
| Rheumatoid arthritis                      | 1.72e-04       | IL1B; TNFSF11; ICAM1          | 6.3 Immune disease                           |
| IL-17 signalling pathway                  | 1.84e-04       | CASP3; IL1B; PTGS2            | 5.1 Immune system                            |
| Herpes simplex virus 1 infection          | 2.55e-04       | CASP3; IL1B; BCL2; BAX; TP53  | 6.9 Infectious disease: viral                |
| C-type lectin receptor signalling pathway | 2.55e-04       | IL1B; PTGS2; IL2              | 5.1 Immune system                            |
| Terpenoid backbone biosynthesis           | 3.14e-04       | FDPS; GGPS1                   | 1.9 Metabolism of terpenoids and polyketides |
| Neurotrophin signalling pathway           | 3.79e-04       | BCL2; BAX; TP53               | 5.6 Nervous system                           |
| Autophagy                                 | 4.70e-04       | PTEN; BCL2; HIF1A             | 4.1 Transport and catabolism                 |
| Non-alcoholic fatty liver disease         | 7.31e-04       | CASP3; IL1B; BAX              | 6.7 Endocrine and metabolic disease          |
| Gastric cancer                            | 7.31e-04       | BCL2; BAX; TP53               | 6.2 Cancer: specific types                   |
| PI3K-Akt signalling pathway               | 7.75e-04       | PTEN; BCL2; TP53; IL2         | 3.2 Signal transduction                      |
| Prion diseases                            | 8.01e-04       | IL1B; BAX                     | 6.4 Neurodegenerative disease                |
| Hepatitis C                               | 8.20e-04       | CASP3; BAX; TP53              | 6.9 Infectious disease: viral                |
| Cushing syndrome                          | 8.20e-04       | CYP21A2; AHR; CYP17A1         | 6.7 Endocrine and metabolic disease          |
| Thyroid cancer                            | 8.96e-04       | BAX; TP53                     | 6.2 Cancer: specific types                   |
| African trypanosomiasis                   | 8.96e-04       | IL1B; ICAM1                   | 6.10 Infectious disease: parasitic           |
| Necroptosis                               | 9.32e-04       | IL1B; BCL2; BAX               | 4.2 Cell growth and death                    |
| Hepatocellular carcinoma                  | 1.03e-03       | PTEN; BAX; TP53               | 6.2 Cancer: specific types                   |
| Influenza A                               | 1.09e-03       | FDPS; IL1B; ICAM1             | 6.9 Infectious disease: viral                |
| Graft-versus-host disease                 | 1.10e-03       | IL1B; IL2                     | 6.3 Immune disease                           |
| Type I diabetes mellitus                  | 1.21e-03       | IL1B; IL2                     | 6.7 Endocrine and metabolic disease          |
| Huntington disease                        | 1.54e-03       | CASP3; BAX; TP53              | 6.4 Neurodegenerative disease                |
| Malaria                                   | 1.57e-03       | IL1B; ICAM1                   | 6.10 Infectious disease: parasitic           |
| Proteoglycans in cancer                   | 1.73e-03       | CASP3; HIF1A; TP53            | 6.1 Cancer: overview                         |
| Viral carcinogenesis                      | 1.73e-03       | CASP3; BAX; TP53              | 6.1 Cancer: overview                         |

| <b>KEGG Term</b>                                    | <b>p-value</b> | <b>Genes</b>       | <b>Category of KEGG Term</b>             |
|-----------------------------------------------------|----------------|--------------------|------------------------------------------|
| Pathogenic Escherichia coli infection               | 1.97e-03       | TUBB1; TUBA4A      | 6.8 Infectious disease: bacterial        |
| Legionellosis                                       | 1.97e-03       | CASP3; IL1B        | 6.8 Infectious disease: bacterial        |
| Human immunodeficiency virus 1 infection            | 2.02e-03       | CASP3; BCL2; BAX   | 6.9 Infectious disease: viral            |
| Viral myocarditis                                   | 2.26e-03       | CASP3; ICAM1       | 6.6 Cardiovascular disease               |
| Basal cell carcinoma                                | 2.58e-03       | BAX; TP53          | 6.2 Cancer: specific types               |
| Mitophagy                                           | 2.74e-03       | HIF1A; TP53        | 4.1 Transport and catabolism             |
| Inflammatory bowel disease                          | 2.74e-03       | IL1B; IL2          | 6.3 Immune disease                       |
| Cortisol synthesis and secretion                    | 2.74e-03       | CYP21A2; CYP17A1   | 5.2 Endocrine system                     |
| Non-small cell lung cancer                          | 2.82e-03       | BAX; TP53          | 6.2 Cancer: specific types               |
| Leishmaniasis                                       | 3.54e-03       | IL1B; PTGS2        | 6.10 Infectious disease: parasitic       |
| Pancreatic cancer                                   | 3.63e-03       | BAX; TP53          | 6.2 Cancer: specific types               |
| Pertussis                                           | 3.73e-03       | CASP3; IL1B        | 6.8 Infectious disease: bacterial        |
| Chronic myeloid leukemia                            | 3.73e-03       | BAX; TP53          | 6.2 Cancer: specific types               |
| Gap junction                                        | 4.96e-03       | TUBB1; TUBA4A      | 4.3 Cellular community - eukaryotes      |
| Cytokine-cytokine receptor interaction              | 5.06e-03       | IL1B; TNFSF11; IL2 | 3.3 Signalling molecules and interaction |
| MAPK signalling pathway                             | 5.11e-03       | CASP3; IL1B; TP53  | 3.2 Signal transduction                  |
| Amoebiasis                                          | 5.87e-03       | CASP3; IL1B        | 6.10 Infectious disease: parasitic       |
| HIF-1 signalling pathway                            | 6.36e-03       | BCL2; HIF1A        | 3.2 Signal transduction                  |
| T cell receptor signalling pathway                  | 6.48e-03       | PDCD1; IL2         | 5.1 Immune system                        |
| Longevity regulating pathway                        | 6.61e-03       | BAX; TP53          | 5.9 Aging                                |
| Chagas disease (American trypanosomiasis)           | 6.73e-03       | IL1B; IL2          | 6.10 Infectious disease: parasitic       |
| Parathyroid hormone synthesis, secretion and action | 7.12e-03       | BCL2; TNFSF11      | 5.2 Endocrine system                     |
| Serotonergic synapse                                | 8.05e-03       | CASP3; PTGS2       | 5.6 Nervous system                       |
| Toxoplasmosis                                       | 8.05e-03       | CASP3; BCL2        | 6.10 Infectious disease: parasitic       |
| Thyroid hormone signalling pathway                  | 8.47e-03       | HIF1A; TP53        | 5.2 Endocrine system                     |
| Osteoclast differentiation                          | 1.01e-02       | IL1B; TNFSF11      | 5.8 Development and regeneration         |
| Natural killer cell mediated cytotoxicity           | 1.07e-02       | CASP3; ICAM1       | 5.1 Immune system                        |
| Cell adhesion molecules                             | 1.30e-02       | PDCD1; ICAM1       | 3.3 Signalling molecules and interaction |
| Phagosome                                           | 1.42e-02       | TUBB1; TUBA4A      | 4.1 Transport and catabolism             |
| Cellular senescence                                 | 1.56e-02       | PTEN; TP53         | 4.2 Cell growth and death                |
| JAK-STAT signalling pathway                         | 1.60e-02       | BCL2; IL2          | 3.2 Signal transduction                  |
| Protein processing in endoplasmic reticulum         | 1.66e-02       | BCL2; BAX          | 2.3 Folding, sorting and degradation     |

| <b>KEGG Term</b>                        | <b>p-value</b> | <b>Genes</b> | <b>Category of KEGG Term</b>        |
|-----------------------------------------|----------------|--------------|-------------------------------------|
| Alzheimer disease                       | 1.77e-02       | CASP3; IL1B  | 6.4 Neurodegenerative disease       |
| NOD-like receptor signalling pathway    | 1.91e-02       | IL1B; BCL2   | 5.1 Immune system                   |
| Transcriptional misregulation in cancer | 2.08e-02       | BAX; TP53    | 6.1 Cancer: overview                |
| Focal adhesion                          | 2.35e-02       | PTEN; BCL2   | 4.3 Cellular community - eukaryotes |
| Allograft rejection                     | 4.46e-02       | IL2          | 6.3 Immune disease                  |
| Ferroptosis                             | 4.69e-02       | TP53         | 4.2 Cell growth and death           |
| Bladder cancer                          | 4.81e-02       | TP53         | 6.2 Cancer: specific types          |

Note: AR: Androgen receptor; BAX: B-cell lymphoma-2 associated X; BCL2: B-cell lymphoma-2; CASP3: Caspase 3; CYP17A1: Cytochrome P450 family 17 subfamily A member 1; CYP21A2: Cytochrome P450 family 21 subfamily A member 2; CYP19A1: Cytochrome P450 family 19 subfamily A member 1; FDPS: Farnesyl diphosphate synthase; GGPS1: Geranylgeranyl diphosphate synthase1; GNRHR: Gonadotropin releasing hormone receptor; HIF1A: Hypoxia inducible factor-1 $\alpha$ ; ICAM1: Intercellular cell adhesion molecule 1; IL1B: Interleukin 1 $\beta$ ; IL2: Interleukin 2; LHCGR: Luteinizing hormone/choriogonadotropin receptor; MAP4: Microtubule associated protein 4; MAPT: Microtubule associated protein tau; NR1I2: Nuclear receptor subfamily 1 group I member 2; PDCD1: Programmed cell death 1; PTEN: Phosphatase and tensin homolog; PTGS2: Prostaglandin-endoperoxide synthase 2; TNFSF11: Tumour necrosis factor superfamily member 11; TP53: Tumour protein 53; TUBA4A: Tubulin alpha 4a; TUBB1: Tubulin beta 1 class VI.



**Supplementary Table S4. Details of docking results between 621 natural compounds from Danggui Beimu Kushen Wan and 21 targets for prostate cancer (kcal/mol).**

| Compound ID | Min   | 25% Percentile | Med  | 75% Percentile | Max  | Average Value | SD   | SEM  | 95% Confidence Interval of Mean |       |
|-------------|-------|----------------|------|----------------|------|---------------|------|------|---------------------------------|-------|
|             |       |                |      |                |      |               |      |      | Lower                           | Upper |
| DA001       | -8.3  | -7.9           | -7.3 | -6.4           | -5.9 | -7.17         | 0.79 | 0.17 | -7.53                           | -6.81 |
| DA002       | -7.7  | -6.8           | -6.6 | -6.0           | -5.4 | -6.47         | 0.64 | 0.14 | -6.76                           | -6.18 |
| DA003       | -6.5  | -6.1           | -5.7 | -5.5           | -4.8 | -5.76         | 0.49 | 0.11 | -5.98                           | -5.53 |
| DA004       | -4.1  | -3.7           | -3.6 | -3.3           | -2.8 | -3.53         | 0.34 | 0.08 | -3.69                           | -3.37 |
| DA005       | -6.5  | -6.1           | -5.6 | -5.1           | -4.5 | -5.61         | 0.60 | 0.13 | -5.88                           | -5.34 |
| DA006       | -7.2  | -5.9           | -5.5 | -5.1           | -3.9 | -5.49         | 0.92 | 0.20 | -5.90                           | -5.07 |
| DA007       | -9.7  | -7.3           | -6.6 | -5.7           | -5.1 | -6.61         | 1.13 | 0.25 | -7.13                           | -6.10 |
| DA008       | -7.1  | -6.4           | -6.1 | -5.6           | -4.5 | -5.93         | 0.73 | 0.16 | -6.26                           | -5.59 |
| DA009       | -6.7  | -5.3           | -4.9 | -4.2           | -3.3 | -4.87         | 0.82 | 0.18 | -5.24                           | -4.49 |
| DA010       | -5.6  | -5.2           | -4.9 | -4.9           | -4.2 | -5.00         | 0.35 | 0.08 | -5.16                           | -4.84 |
| DA011       | -3.9  | -3.8           | -3.6 | -3.3           | -2.9 | -3.50         | 0.32 | 0.07 | -3.65                           | -3.36 |
| DA012       | -7.7  | -7.0           | -6.0 | -5.9           | -4.9 | -6.33         | 0.80 | 0.17 | -6.70                           | -5.97 |
| DA013       | -6.5  | -5.8           | -5.5 | -5.2           | -4.6 | -5.47         | 0.48 | 0.11 | -5.69                           | -5.25 |
| DA014       | -4.4  | -4.2           | -3.9 | -3.7           | -3.1 | -3.90         | 0.35 | 0.08 | -4.06                           | -3.75 |
| DA015       | -4.6  | -4.1           | -4.0 | -3.8           | -3.2 | -3.92         | 0.33 | 0.07 | -4.07                           | -3.77 |
| DA016       | -5.9  | -5.5           | -5.2 | -4.7           | -4.4 | -5.16         | 0.47 | 0.10 | -5.37                           | -4.94 |
| DA017       | -6.1  | -5.7           | -5.2 | -5.0           | -4.1 | -5.18         | 0.59 | 0.13 | -5.45                           | -4.91 |
| DA018       | -5.9  | -5.2           | -4.7 | -4.2           | -3.3 | -4.65         | 0.74 | 0.16 | -4.98                           | -4.31 |
| DA019       | -5.3  | -5.0           | -4.6 | -4.4           | -3.3 | -4.59         | 0.55 | 0.12 | -4.84                           | -4.34 |
| DA020       | -6.2  | -5.5           | -5.2 | -4.7           | -3.8 | -5.11         | 0.60 | 0.13 | -5.38                           | -4.83 |
| DA021       | -10.4 | -8.7           | -8.2 | -7.2           | -6.2 | -8.16         | 1.13 | 0.25 | -8.68                           | -7.65 |
| DA022       | -9.0  | -7.7           | -7.2 | -6.8           | -5.5 | -7.16         | 0.85 | 0.19 | -7.55                           | -6.77 |
| DA023       | -7.1  | -5.7           | -5.3 | -4.9           | -4.3 | -5.36         | 0.65 | 0.14 | -5.65                           | -5.06 |
| DA024       | -5.4  | -5.0           | -4.7 | -4.3           | -3.8 | -4.62         | 0.49 | 0.11 | -4.84                           | -4.40 |
| DA025       | -6.7  | -6.1           | -5.6 | -5.3           | -4.3 | -5.60         | 0.71 | 0.15 | -5.92                           | -5.27 |
| DA026       | -6.7  | -6.2           | -5.8 | -5.4           | -4.5 | -5.71         | 0.66 | 0.14 | -6.02                           | -5.41 |
| DA027       | -9.7  | -9.0           | -8.3 | -7.3           | -6.2 | -8.14         | 1.04 | 0.23 | -8.62                           | -7.67 |

| Compound ID | Min   | 25% Percentile | Med  | 75% Percentile | Max  | Average Value | SD   | SEM  | 95% Confidence Interval of Mean |       |
|-------------|-------|----------------|------|----------------|------|---------------|------|------|---------------------------------|-------|
|             |       |                |      |                |      |               |      |      | Lower                           | Upper |
| DA028       | -8.5  | -7.4           | -6.9 | -6.3           | -5.5 | -6.92         | 0.74 | 0.16 | -7.26                           | -6.58 |
| DA029       | -10.5 | -9.1           | -8.2 | -7.8           | -6.5 | -8.40         | 1.03 | 0.22 | -8.86                           | -7.93 |
| DA030       | -5.2  | -4.6           | -4.3 | -4.0           | -3.4 | -4.28         | 0.52 | 0.11 | -4.52                           | -4.04 |
| DA031       | -9.1  | -7.3           | -7.0 | -6.5           | -5.4 | -6.88         | 0.91 | 0.20 | -7.29                           | -6.46 |
| DA032       | -5.5  | -4.9           | -4.7 | -4.4           | -3.7 | -4.70         | 0.50 | 0.11 | -4.92                           | -4.47 |
| DA033       | -9.3  | -7.7           | -6.7 | -6.3           | -5.1 | -6.90         | 1.09 | 0.24 | -7.40                           | -6.40 |
| DA035       | -9.5  | -7.5           | -7.0 | -5.8           | -5.1 | -6.80         | 1.17 | 0.26 | -7.33                           | -6.27 |
| DA036       | -8.7  | -7.2           | -6.7 | -5.6           | -5.1 | -6.61         | 1.00 | 0.22 | -7.06                           | -6.15 |
| DA037       | -9.4  | -7.5           | -6.8 | -5.9           | -5.5 | -6.92         | 1.01 | 0.22 | -7.39                           | -6.46 |
| DA038       | -9.5  | -7.3           | -6.9 | -6.0           | -5.2 | -6.85         | 1.00 | 0.22 | -7.30                           | -6.39 |
| DA039       | -7.3  | -5.9           | -5.6 | -5.3           | -4.0 | -5.59         | 0.83 | 0.18 | -5.97                           | -5.21 |
| DA040       | -9.8  | -8.4           | -7.8 | -6.8           | -5.8 | -7.75         | 1.07 | 0.23 | -8.24                           | -7.27 |
| DA041       | -6.0  | -5.5           | -5.1 | -4.9           | -3.6 | -5.12         | 0.66 | 0.14 | -5.42                           | -4.83 |
| DA042       | -7.7  | -6.6           | -6.3 | -5.9           | -5.1 | -6.31         | 0.63 | 0.14 | -6.60                           | -6.03 |
| DA043       | -8.6  | -7.8           | -7.2 | -6.3           | -5.8 | -7.04         | 0.90 | 0.20 | -7.45                           | -6.63 |
| DA044       | -7.1  | -5.7           | -5.3 | -4.7           | -3.9 | -5.31         | 0.82 | 0.18 | -5.69                           | -4.94 |
| DA046       | -6.1  | -5.7           | -5.5 | -5.0           | -4.5 | -5.40         | 0.47 | 0.10 | -5.61                           | -5.19 |
| DA047       | -9.2  | -7.3           | -6.8 | -6.0           | -5.1 | -6.73         | 1.03 | 0.23 | -7.20                           | -6.26 |
| DA050       | -9.5  | -7.2           | -6.8 | -5.6           | -5.3 | -6.70         | 1.11 | 0.24 | -7.20                           | -6.20 |
| DA051       | -7.2  | -6.4           | -5.7 | -5.1           | -4.5 | -5.75         | 0.81 | 0.18 | -6.12                           | -5.38 |
| DA052       | -7.0  | -6.4           | -5.9 | -5.5           | -4.7 | -5.90         | 0.66 | 0.14 | -6.20                           | -5.60 |
| DA053       | -6.6  | -6.2           | -5.6 | -5.4           | -4.5 | -5.74         | 0.61 | 0.13 | -6.02                           | -5.46 |
| DA054       | -10.0 | -7.3           | -6.7 | -6.4           | -5.3 | -6.86         | 1.08 | 0.24 | -7.35                           | -6.36 |
| DA055       | -9.1  | -7.5           | -6.7 | -5.5           | -5.1 | -6.66         | 1.08 | 0.24 | -7.15                           | -6.16 |
| DA056       | -9.3  | -7.4           | -6.9 | -5.7           | -5.2 | -6.74         | 1.13 | 0.25 | -7.26                           | -6.23 |
| DA057       | -9.6  | -7.2           | -6.7 | -5.9           | -5.1 | -6.72         | 1.10 | 0.24 | -7.22                           | -6.22 |
| DA058       | -7.0  | -6.2           | -5.7 | -5.5           | -4.4 | -5.79         | 0.71 | 0.15 | -6.11                           | -5.47 |
| DA059       | -6.5  | -5.7           | -5.5 | -5.2           | -4.1 | -5.45         | 0.57 | 0.12 | -5.71                           | -5.20 |
| DA060       | -8.9  | -6.9           | -6.8 | -5.6           | -4.9 | -6.55         | 0.98 | 0.21 | -7.00                           | -6.11 |
| DA061       | -8.1  | -7.0           | -6.7 | -6.1           | -5.1 | -6.57         | 0.79 | 0.17 | -6.93                           | -6.21 |
| DA062       | -7.7  | -6.9           | -6.2 | -5.9           | -4.7 | -6.40         | 0.75 | 0.16 | -6.74                           | -6.05 |

| Compound ID | Min   | 25% Percentile | Med  | 75% Percentile | Max  | Average Value | SD   | SEM  | 95% Confidence Interval of Mean |       |
|-------------|-------|----------------|------|----------------|------|---------------|------|------|---------------------------------|-------|
|             |       |                |      |                |      |               |      |      | Lower                           | Upper |
| DA063       | -7.5  | -6.6           | -6.3 | -5.7           | -4.8 | -6.20         | 0.71 | 0.15 | -6.52                           | -5.87 |
| DA064       | -9.7  | -7.7           | -6.7 | -6.2           | -5.3 | -6.94         | 1.18 | 0.26 | -7.48                           | -6.40 |
| DA065       | -6.9  | -6.1           | -5.6 | -5.1           | -4.2 | -5.58         | 0.75 | 0.16 | -5.92                           | -5.24 |
| DA066       | -7.1  | -6.1           | -5.6 | -5.4           | -4.5 | -5.66         | 0.69 | 0.15 | -5.98                           | -5.35 |
| DA067       | -7.0  | -5.8           | -5.4 | -5.1           | -4.2 | -5.50         | 0.81 | 0.18 | -5.87                           | -5.13 |
| DA068       | -7.9  | -6.5           | -5.8 | -5.4           | -4.8 | -6.04         | 0.88 | 0.19 | -6.44                           | -5.64 |
| DA070       | -7.1  | -6.3           | -5.8 | -5.2           | -4.6 | -5.81         | 0.72 | 0.16 | -6.14                           | -5.48 |
| DA071       | -6.2  | -5.6           | -5.2 | -4.8           | -4.0 | -5.18         | 0.63 | 0.14 | -5.46                           | -4.89 |
| DA072       | -5.4  | -4.9           | -4.4 | -4.2           | -3.0 | -4.42         | 0.62 | 0.14 | -4.71                           | -4.14 |
| DA073       | -6.0  | -5.4           | -5.0 | -4.6           | -3.7 | -4.96         | 0.66 | 0.14 | -5.26                           | -4.66 |
| DA074       | -8.8  | -6.8           | -6.3 | -5.7           | -5.0 | -6.37         | 0.95 | 0.21 | -6.80                           | -5.94 |
| DA075       | -8.7  | -6.4           | -5.9 | -5.1           | -4.8 | -6.00         | 1.04 | 0.23 | -6.47                           | -5.53 |
| DA076       | -6.2  | -5.3           | -4.5 | -4.0           | -3.2 | -4.59         | 0.83 | 0.18 | -4.97                           | -4.21 |
| DA077       | -6.5  | -5.7           | -5.4 | -5.0           | -4.0 | -5.29         | 0.70 | 0.15 | -5.60                           | -4.97 |
| DA078       | -8.7  | -7.5           | -6.6 | -5.9           | -5.3 | -6.78         | 0.97 | 0.21 | -7.22                           | -6.34 |
| DA079       | -9.3  | -7.1           | -6.6 | -5.7           | -5.2 | -6.60         | 1.06 | 0.23 | -7.08                           | -6.12 |
| DA080       | -9.6  | -7.7           | -6.8 | -6.0           | -5.2 | -6.92         | 1.17 | 0.25 | -7.45                           | -6.39 |
| DA081       | -5.5  | -5.1           | -4.7 | -4.4           | -4.1 | -4.74         | 0.44 | 0.09 | -4.94                           | -4.54 |
| DA082       | -6.7  | -6.2           | -5.8 | -5.4           | -4.4 | -5.74         | 0.72 | 0.16 | -6.07                           | -5.41 |
| DA083       | -8.7  | -7.2           | -6.4 | -5.7           | -5.0 | -6.50         | 1.07 | 0.23 | -6.98                           | -6.01 |
| DA084       | -9.2  | -7.3           | -6.8 | -5.5           | -5.2 | -6.69         | 1.16 | 0.25 | -7.21                           | -6.16 |
| DA085       | -10.0 | -7.4           | -6.9 | -5.7           | -5.1 | -6.75         | 1.19 | 0.26 | -7.29                           | -6.21 |
| DA087       | -6.7  | -6.1           | -5.5 | -4.9           | -4.3 | -5.51         | 0.71 | 0.15 | -5.83                           | -5.19 |
| DA088       | -6.1  | -5.5           | -5.1 | -4.9           | -3.7 | -5.05         | 0.60 | 0.13 | -5.33                           | -4.78 |
| DA089       | -7.2  | -5.8           | -5.6 | -5.1           | -4.0 | -5.55         | 0.84 | 0.18 | -5.93                           | -5.17 |
| DA090       | -6.6  | -6.0           | -5.7 | -5.3           | -4.1 | -5.56         | 0.69 | 0.15 | -5.88                           | -5.25 |
| DA091       | -6.8  | -6.2           | -6.0 | -5.3           | -4.5 | -5.77         | 0.70 | 0.15 | -6.09                           | -5.45 |
| DA092       | -6.2  | -5.1           | -4.5 | -4.0           | -3.3 | -4.57         | 0.81 | 0.18 | -4.94                           | -4.20 |
| DA093       | -7.9  | -6.8           | -6.3 | -5.8           | -5.0 | -6.38         | 0.84 | 0.18 | -6.76                           | -6.00 |
| DA095       | -6.1  | -5.6           | -5.3 | -5.0           | -4.0 | -5.25         | 0.53 | 0.12 | -5.49                           | -5.01 |
| DA096       | -5.9  | -5.3           | -5.1 | -4.8           | -3.8 | -5.00         | 0.58 | 0.13 | -5.27                           | -4.73 |

| Compound ID | Min  | 25% Percentile | Med  | 75% Percentile | Max  | Average Value | SD   | SEM  | 95% Confidence Interval of Mean |       |
|-------------|------|----------------|------|----------------|------|---------------|------|------|---------------------------------|-------|
|             |      |                |      |                |      |               |      |      | Lower                           | Upper |
| DA097       | -6.7 | -6.1           | -5.5 | -5.2           | -4.0 | -5.57         | 0.78 | 0.17 | -5.93                           | -5.22 |
| DA098       | -6.1 | -5.6           | -5.4 | -5.0           | -4.2 | -5.26         | 0.55 | 0.12 | -5.51                           | -5.01 |
| DA099       | -8.2 | -7.0           | -6.0 | -5.5           | -3.5 | -6.06         | 1.17 | 0.26 | -6.60                           | -5.53 |
| DA100       | -6.1 | -5.6           | -5.4 | -5.1           | -4.0 | -5.26         | 0.56 | 0.12 | -5.52                           | -5.01 |
| DA101       | -5.7 | -5.0           | -4.8 | -4.6           | -3.4 | -4.67         | 0.55 | 0.12 | -4.92                           | -4.42 |
| DA102       | -4.6 | -4.3           | -4.0 | -4.0           | -3.3 | -4.05         | 0.32 | 0.07 | -4.20                           | -3.91 |
| DA103       | -6.5 | -5.3           | -4.7 | -4.4           | -4.0 | -4.90         | 0.68 | 0.15 | -5.21                           | -4.59 |
| DA104       | -6.2 | -5.4           | -4.9 | -4.7           | -3.9 | -5.02         | 0.58 | 0.13 | -5.29                           | -4.76 |
| DA105       | -6.6 | -6.5           | -6.0 | -5.5           | -4.9 | -5.91         | 0.58 | 0.13 | -6.17                           | -5.65 |
| DA106       | -6.6 | -5.5           | -4.8 | -4.5           | -3.8 | -5.05         | 0.75 | 0.16 | -5.39                           | -4.71 |
| DA107       | -6.5 | -5.3           | -5.1 | -4.6           | -3.9 | -5.10         | 0.76 | 0.17 | -5.45                           | -4.76 |
| DA108       | -6.8 | -5.6           | -4.9 | -4.6           | -4.1 | -5.10         | 0.70 | 0.15 | -5.42                           | -4.79 |
| DA109       | -6.6 | -6.1           | -5.6 | -5.2           | -4.1 | -5.61         | 0.62 | 0.13 | -5.89                           | -5.33 |
| DA110       | -6.7 | -6.0           | -5.8 | -5.3           | -4.6 | -5.64         | 0.60 | 0.13 | -5.92                           | -5.37 |
| DA111       | -7.1 | -6.4           | -6.0 | -5.5           | -4.7 | -5.85         | 0.68 | 0.15 | -6.16                           | -5.54 |
| DA112       | -6.7 | -6.0           | -5.8 | -5.4           | -4.8 | -5.76         | 0.59 | 0.13 | -6.03                           | -5.49 |
| DA114       | -5.9 | -5.0           | -4.5 | -4.3           | -3.4 | -4.58         | 0.62 | 0.14 | -4.86                           | -4.30 |
| DA115       | -6.4 | -6.0           | -5.7 | -5.1           | -4.6 | -5.56         | 0.52 | 0.11 | -5.80                           | -5.32 |
| DA116       | -6.1 | -5.0           | -4.7 | -4.1           | -3.2 | -4.65         | 0.73 | 0.16 | -4.98                           | -4.32 |
| DA117       | -5.7 | -5.2           | -4.9 | -4.3           | -3.8 | -4.80         | 0.55 | 0.12 | -5.05                           | -4.55 |
| DA118       | -6.3 | -5.3           | -4.9 | -4.6           | -3.7 | -4.89         | 0.67 | 0.15 | -5.20                           | -4.58 |
| DA119       | -6.2 | -5.8           | -5.6 | -5.2           | -4.6 | -5.45         | 0.48 | 0.11 | -5.67                           | -5.23 |
| DA120       | -6.1 | -5.4           | -4.8 | -4.3           | -3.6 | -4.79         | 0.71 | 0.16 | -5.11                           | -4.47 |
| DA121       | -5.7 | -5.2           | -4.5 | -4.2           | -3.2 | -4.60         | 0.73 | 0.16 | -4.93                           | -4.27 |
| DA122       | -5.5 | -5.0           | -4.7 | -4.3           | -3.1 | -4.56         | 0.64 | 0.14 | -4.85                           | -4.27 |
| DA123       | -6.2 | -6.0           | -5.6 | -4.9           | -4.3 | -5.50         | 0.59 | 0.13 | -5.77                           | -5.24 |
| DA125       | -6.8 | -6.1           | -5.7 | -5.1           | -4.3 | -5.64         | 0.68 | 0.15 | -5.95                           | -5.33 |
| DA126       | -7.6 | -6.8           | -6.3 | -5.6           | -4.8 | -6.26         | 0.83 | 0.18 | -6.64                           | -5.88 |
| DA127       | -5.7 | -5.4           | -5.1 | -4.5           | -3.7 | -4.93         | 0.61 | 0.13 | -5.21                           | -4.66 |
| DA128       | -7.3 | -6.5           | -5.7 | -5.6           | -4.6 | -5.87         | 0.78 | 0.17 | -6.22                           | -5.51 |
| DA129       | -7.8 | -6.2           | -5.8 | -4.9           | -4.6 | -5.83         | 0.96 | 0.21 | -6.26                           | -5.39 |

| Compound ID | Min   | 25% Percentile | Med  | 75% Percentile | Max  | Average Value | SD   | SEM  | 95% Confidence Interval of Mean |       |
|-------------|-------|----------------|------|----------------|------|---------------|------|------|---------------------------------|-------|
|             |       |                |      |                |      |               |      |      | Lower                           | Upper |
| DA130       | -5.6  | -5.1           | -4.8 | -4.6           | -3.8 | -4.77         | 0.47 | 0.10 | -4.98                           | -4.55 |
| DA133       | -6.3  | -5.4           | -4.8 | -4.4           | -3.7 | -4.88         | 0.66 | 0.14 | -5.18                           | -4.57 |
| DA134       | -6.1  | -5.3           | -5.1 | -4.8           | -4.0 | -5.03         | 0.51 | 0.11 | -5.27                           | -4.80 |
| DA136       | -6.7  | -5.7           | -5.4 | -4.9           | -3.7 | -5.30         | 0.75 | 0.16 | -5.64                           | -4.96 |
| DA137       | -9.3  | -7.0           | -6.3 | -5.4           | -4.8 | -6.37         | 1.15 | 0.25 | -6.90                           | -5.85 |
| DA138       | -10.7 | -8.9           | -8.0 | -7.5           | -6.4 | -8.19         | 1.09 | 0.24 | -8.68                           | -7.69 |
| DA139       | -6.8  | -6.4           | -5.7 | -5.4           | -4.8 | -5.81         | 0.62 | 0.14 | -6.09                           | -5.53 |
| DA140       | -7.0  | -6.2           | -6.0 | -5.6           | -4.7 | -5.84         | 0.66 | 0.14 | -6.14                           | -5.54 |
| DA141       | -5.9  | -5.5           | -5.2 | -4.6           | -3.6 | -5.03         | 0.66 | 0.14 | -5.33                           | -4.73 |
| DA143       | -5.5  | -5.0           | -4.7 | -4.2           | -3.7 | -4.62         | 0.56 | 0.12 | -4.88                           | -4.37 |
| DA144       | -5.8  | -5.1           | -4.8 | -4.1           | -3.6 | -4.67         | 0.70 | 0.15 | -4.99                           | -4.35 |
| DA145       | -6.1  | -5.4           | -5.0 | -4.5           | -3.7 | -5.01         | 0.62 | 0.14 | -5.29                           | -4.73 |
| DA146       | -6.9  | -5.4           | -4.8 | -4.4           | -3.8 | -4.92         | 0.77 | 0.17 | -5.27                           | -4.58 |
| DA147       | -6.0  | -5.3           | -4.8 | -4.4           | -3.4 | -4.77         | 0.76 | 0.17 | -5.12                           | -4.42 |
| DA148       | -8.5  | -7.1           | -6.8 | -5.6           | -5.2 | -6.60         | 1.05 | 0.23 | -7.08                           | -6.12 |
| DA149       | -4.8  | -4.3           | -4.1 | -3.9           | -3.2 | -4.09         | 0.40 | 0.09 | -4.27                           | -3.91 |
| DA150       | -6.0  | -5.2           | -4.7 | -4.4           | -3.3 | -4.70         | 0.69 | 0.15 | -5.01                           | -4.38 |
| DA152       | -6.7  | -5.6           | -5.2 | -4.7           | -4.1 | -5.22         | 0.66 | 0.14 | -5.52                           | -4.92 |
| DA153       | -7.3  | -6.1           | -5.2 | -5.0           | -3.9 | -5.43         | 0.98 | 0.21 | -5.87                           | -4.98 |
| DA154       | -6.3  | -5.4           | -5.1 | -4.3           | -3.6 | -4.90         | 0.75 | 0.16 | -5.24                           | -4.56 |
| DA155       | -4.7  | -4.4           | -4.2 | -4.0           | -3.4 | -4.15         | 0.35 | 0.08 | -4.31                           | -3.99 |
| DA156       | -5.5  | -4.8           | -4.3 | -4.1           | -3.5 | -4.37         | 0.51 | 0.11 | -4.60                           | -4.13 |
| DA157       | -5.2  | -4.8           | -4.5 | -4.0           | -3.3 | -4.38         | 0.55 | 0.12 | -4.63                           | -4.12 |
| DA158       | -5.3  | -4.7           | -4.2 | -4.1           | -3.0 | -4.27         | 0.58 | 0.13 | -4.53                           | -4.00 |
| DA159       | -8.4  | -6.9           | -6.4 | -5.6           | -4.8 | -6.40         | 0.95 | 0.21 | -6.83                           | -5.97 |
| DA160       | -8.4  | -7.2           | -6.7 | -6.1           | -5.3 | -6.78         | 0.88 | 0.19 | -7.18                           | -6.38 |
| DA161       | -5.8  | -5.3           | -4.9 | -4.3           | -3.7 | -4.77         | 0.62 | 0.13 | -5.05                           | -4.49 |
| DA162       | -11.0 | -8.6           | -8.0 | -7.3           | -6.0 | -8.10         | 1.25 | 0.27 | -8.67                           | -7.52 |
| DA163       | -6.1  | -5.0           | -4.6 | -4.1           | -3.4 | -4.60         | 0.75 | 0.16 | -4.95                           | -4.26 |
| DA164       | -5.9  | -5.1           | -4.9 | -4.5           | -4.0 | -4.87         | 0.48 | 0.10 | -5.09                           | -4.65 |
| DA165       | -6.1  | -5.2           | -4.9 | -4.2           | -3.3 | -4.76         | 0.71 | 0.15 | -5.08                           | -4.44 |

| Compound ID | Min   | 25% Percentile | Med  | 75% Percentile | Max  | Average Value | SD   | SEM  | 95% Confidence Interval of Mean |       |
|-------------|-------|----------------|------|----------------|------|---------------|------|------|---------------------------------|-------|
|             |       |                |      |                |      |               |      |      | Lower                           | Upper |
| DA166       | -7.9  | -7.0           | -6.6 | -5.7           | -5.2 | -6.44         | 0.79 | 0.17 | -6.80                           | -6.08 |
| DA168       | -6.4  | -5.7           | -5.4 | -5.0           | -4.0 | -5.33         | 0.61 | 0.13 | -5.61                           | -5.05 |
| DA169       | -6.8  | -6.2           | -5.8 | -5.3           | -4.5 | -5.72         | 0.73 | 0.16 | -6.05                           | -5.39 |
| DA170       | -10.0 | -7.9           | -7.1 | -6.7           | -6.0 | -7.45         | 1.04 | 0.23 | -7.93                           | -6.98 |
| DA171       | -6.2  | -5.6           | -5.1 | -4.9           | -4.2 | -5.12         | 0.54 | 0.12 | -5.36                           | -4.87 |
| DA172       | -5.3  | -4.7           | -4.5 | -4.2           | -3.4 | -4.43         | 0.54 | 0.12 | -4.68                           | -4.19 |
| DA173       | -5.8  | -5.0           | -4.6 | -4.4           | -3.5 | -4.63         | 0.58 | 0.13 | -4.90                           | -4.37 |
| DA174       | -5.8  | -5.2           | -4.8 | -4.1           | -3.4 | -4.67         | 0.74 | 0.16 | -5.00                           | -4.33 |
| DA175       | -6.3  | -5.7           | -5.4 | -5.0           | -4.1 | -5.32         | 0.54 | 0.12 | -5.57                           | -5.07 |
| DA176       | -6.9  | -5.8           | -5.5 | -4.7           | -4.0 | -5.38         | 0.86 | 0.19 | -5.77                           | -4.99 |
| DA177       | -5.6  | -5.0           | -4.7 | -4.5           | -4.0 | -4.76         | 0.40 | 0.09 | -4.94                           | -4.58 |
| DA178       | -5.5  | -5.2           | -4.9 | -4.6           | -3.3 | -4.78         | 0.63 | 0.14 | -5.07                           | -4.49 |
| DA179       | -6.4  | -5.5           | -5.0 | -4.8           | -3.7 | -5.06         | 0.74 | 0.16 | -5.40                           | -4.72 |
| DA180       | -6.6  | -5.7           | -5.4 | -4.8           | -4.0 | -5.31         | 0.70 | 0.15 | -5.63                           | -4.99 |
| DA182       | -5.6  | -4.9           | -4.6 | -4.2           | -3.6 | -4.60         | 0.55 | 0.12 | -4.84                           | -4.35 |
| DA183       | -6.1  | -5.6           | -5.4 | -5.2           | -4.3 | -5.34         | 0.48 | 0.10 | -5.56                           | -5.12 |
| DA184       | -8.0  | -6.7           | -6.3 | -5.6           | -4.3 | -6.22         | 0.89 | 0.19 | -6.63                           | -5.82 |
| DA185       | -6.6  | -5.7           | -5.4 | -5.0           | -4.1 | -5.30         | 0.59 | 0.13 | -5.56                           | -5.03 |
| DA186       | -6.9  | -6.2           | -5.9 | -5.5           | -4.4 | -5.75         | 0.68 | 0.15 | -6.06                           | -5.44 |
| DA188       | -7.1  | -5.9           | -5.6 | -5.2           | -4.0 | -5.57         | 0.80 | 0.18 | -5.94                           | -5.21 |
| DA190       | -7.6  | -6.3           | -5.9 | -5.1           | -4.4 | -5.87         | 0.92 | 0.20 | -6.28                           | -5.45 |
| DA191       | -8.5  | -7.2           | -6.7 | -6.1           | -5.3 | -6.70         | 0.83 | 0.18 | -7.08                           | -6.33 |
| DA192       | -9.0  | -7.2           | -6.9 | -6.3           | -5.4 | -6.83         | 0.88 | 0.19 | -7.23                           | -6.43 |
| DA193       | -8.8  | -6.7           | -6.1 | -5.5           | -4.8 | -6.20         | 0.99 | 0.22 | -6.66                           | -5.75 |
| DA196       | -6.0  | -5.1           | -4.8 | -4.2           | -3.4 | -4.65         | 0.66 | 0.14 | -4.95                           | -4.35 |
| DA198       | -8.1  | -6.8           | -6.4 | -5.6           | -4.2 | -6.19         | 0.92 | 0.20 | -6.61                           | -5.77 |
| DA199       | -6.6  | -5.6           | -5.4 | -4.8           | -3.9 | -5.28         | 0.70 | 0.15 | -5.59                           | -4.96 |
| DA200       | -7.0  | -6.3           | -5.9 | -5.5           | -4.5 | -5.82         | 0.68 | 0.15 | -6.13                           | -5.51 |
| DA201       | -6.8  | -6.1           | -5.9 | -4.9           | -4.1 | -5.59         | 0.75 | 0.16 | -5.93                           | -5.24 |
| DA202       | -10.4 | -8.7           | -7.9 | -7.1           | -5.6 | -8.05         | 1.24 | 0.27 | -8.61                           | -7.48 |
| DA203       | -10.6 | -9.0           | -8.3 | -7.5           | -5.4 | -8.20         | 1.29 | 0.28 | -8.79                           | -7.61 |

| Compound ID | Min   | 25% Percentile | Med  | 75% Percentile | Max  | Average Value | SD   | SEM  | 95% Confidence Interval of Mean |       |
|-------------|-------|----------------|------|----------------|------|---------------|------|------|---------------------------------|-------|
|             |       |                |      |                |      |               |      |      | Lower                           | Upper |
| DA205       | -8.9  | -7.3           | -6.7 | -5.7           | -5.0 | -6.62         | 1.07 | 0.23 | -7.11                           | -6.13 |
| DA206       | -5.8  | -5.3           | -5.1 | -4.9           | -4.1 | -5.04         | 0.43 | 0.09 | -5.24                           | -4.85 |
| DA207       | -10.6 | -8.9           | -8.3 | -7.4           | -6.2 | -8.23         | 1.03 | 0.22 | -8.70                           | -7.76 |
| DA208       | -8.2  | -7.3           | -6.5 | -5.8           | -5.1 | -6.59         | 0.96 | 0.21 | -7.02                           | -6.15 |
| DA209       | -6.8  | -6.0           | -5.7 | -5.3           | -4.6 | -5.65         | 0.66 | 0.14 | -5.95                           | -5.35 |
| DA210       | -5.3  | -4.9           | -4.5 | -4.2           | -3.0 | -4.45         | 0.64 | 0.14 | -4.74                           | -4.16 |
| DA211       | -8.3  | -7.0           | -6.5 | -6.0           | -5.0 | -6.58         | 0.78 | 0.17 | -6.94                           | -6.23 |
| DA212       | -5.0  | -4.3           | -4.1 | -3.9           | -3.1 | -4.08         | 0.44 | 0.10 | -4.28                           | -3.87 |
| DA213       | -6.7  | -5.7           | -5.4 | -4.8           | -4.3 | -5.40         | 0.69 | 0.15 | -5.72                           | -5.08 |
| DA214       | -6.1  | -5.5           | -5.3 | -5.0           | -4.5 | -5.28         | 0.43 | 0.09 | -5.47                           | -5.08 |
| DA215       | -5.9  | -5.5           | -5.1 | -4.8           | -4.2 | -5.10         | 0.48 | 0.10 | -5.31                           | -4.88 |
| DA216       | -6.3  | -5.9           | -5.5 | -5.2           | -4.5 | -5.43         | 0.54 | 0.12 | -5.68                           | -5.19 |
| DB001       | -7.8  | -6.8           | -6.2 | -6.0           | -5.0 | -6.31         | 0.73 | 0.16 | -6.65                           | -5.98 |
| DB002       | -7.7  | -6.5           | -6.1 | -5.8           | -5.1 | -6.24         | 0.76 | 0.16 | -6.59                           | -5.90 |
| DB003       | -7.8  | -7.0           | -6.4 | -6.1           | -5.1 | -6.47         | 0.77 | 0.17 | -6.82                           | -6.11 |
| DB004       | -7.8  | -7.0           | -6.6 | -6.2           | -5.1 | -6.55         | 0.72 | 0.16 | -6.88                           | -6.22 |
| DB005       | -7.9  | -6.9           | -6.3 | -6.0           | -4.9 | -6.42         | 0.81 | 0.18 | -6.79                           | -6.05 |
| DB006       | -7.6  | -6.7           | -6.2 | -5.9           | -5.1 | -6.26         | 0.72 | 0.16 | -6.59                           | -5.94 |
| DB007       | -7.0  | -6.7           | -6.4 | -5.9           | -5.0 | -6.28         | 0.56 | 0.12 | -6.53                           | -6.02 |
| DB008       | -9.9  | -8.7           | -8.0 | -7.0           | -6.2 | -7.89         | 1.07 | 0.23 | -8.38                           | -7.40 |
| DB009       | -7.8  | -6.9           | -6.5 | -6.0           | -5.0 | -6.41         | 0.70 | 0.15 | -6.73                           | -6.10 |
| DB010       | -9.3  | -8.4           | -7.9 | -6.7           | -5.9 | -7.72         | 0.97 | 0.21 | -8.16                           | -7.28 |
| DB012       | -9.5  | -8.6           | -8.4 | -6.9           | -6.1 | -7.90         | 1.07 | 0.23 | -8.39                           | -7.41 |
| DB013       | -9.6  | -8.0           | -7.5 | -6.6           | -5.6 | -7.39         | 0.93 | 0.20 | -7.82                           | -6.97 |
| DB014       | -7.4  | -6.9           | -6.4 | -5.9           | -4.8 | -6.25         | 0.72 | 0.16 | -6.57                           | -5.92 |
| DB015       | -10.3 | -8.1           | -7.5 | -6.9           | -5.7 | -7.67         | 1.09 | 0.24 | -8.16                           | -7.17 |
| DB016       | -9.9  | -8.6           | -7.9 | -7.4           | -5.9 | -7.88         | 1.03 | 0.22 | -8.34                           | -7.41 |
| DB017       | -9.4  | -8.1           | -7.8 | -6.8           | -6.0 | -7.57         | 0.98 | 0.21 | -8.02                           | -7.12 |
| DB018       | -11.1 | -8.4           | -7.5 | -6.8           | -6.0 | -7.68         | 1.16 | 0.25 | -8.21                           | -7.15 |
| DB019       | -7.7  | -6.9           | -6.5 | -6.0           | -5.0 | -6.43         | 0.73 | 0.16 | -6.76                           | -6.10 |
| DB024       | -7.7  | -6.8           | -6.2 | -6.1           | -5.1 | -6.37         | 0.73 | 0.16 | -6.70                           | -6.03 |

| Compound ID | Min   | 25% Percentile | Med  | 75% Percentile | Max  | Average Value | SD   | SEM  | 95% Confidence Interval of Mean |       |
|-------------|-------|----------------|------|----------------|------|---------------|------|------|---------------------------------|-------|
|             |       |                |      |                |      |               |      |      | Lower                           | Upper |
| DB025       | -7.7  | -6.8           | -6.5 | -6.2           | -4.8 | -6.40         | 0.67 | 0.15 | -6.70                           | -6.09 |
| DB026       | -8.0  | -6.9           | -6.4 | -6.1           | -5.3 | -6.50         | 0.74 | 0.16 | -6.83                           | -6.16 |
| DB027       | -7.6  | -6.8           | -6.5 | -6.1           | -4.9 | -6.44         | 0.70 | 0.15 | -6.76                           | -6.13 |
| DB028       | -7.9  | -7.0           | -6.5 | -6.1           | -5.0 | -6.50         | 0.72 | 0.16 | -6.83                           | -6.18 |
| DB029       | -7.9  | -7.0           | -6.4 | -6.0           | -4.9 | -6.47         | 0.73 | 0.16 | -6.80                           | -6.13 |
| DB030       | -7.9  | -6.8           | -6.4 | -6.0           | -4.9 | -6.41         | 0.69 | 0.15 | -6.72                           | -6.10 |
| DB031       | -7.6  | -6.9           | -6.5 | -6.0           | -5.1 | -6.52         | 0.68 | 0.15 | -6.83                           | -6.21 |
| DB032       | -11.1 | -8.5           | -8.1 | -7.5           | -6.3 | -8.06         | 1.07 | 0.23 | -8.54                           | -7.57 |
| DB034       | -7.9  | -6.7           | -6.3 | -6.0           | -5.1 | -6.30         | 0.74 | 0.16 | -6.64                           | -5.96 |
| DB035       | -7.4  | -6.6           | -6.2 | -5.9           | -4.8 | -6.17         | 0.70 | 0.15 | -6.49                           | -5.85 |
| DB036       | -9.6  | -8.7           | -8.0 | -7.3           | -6.0 | -7.89         | 1.00 | 0.22 | -8.34                           | -7.44 |
| DB037       | -7.9  | -6.6           | -6.1 | -5.9           | -5.1 | -6.30         | 0.78 | 0.17 | -6.65                           | -5.94 |
| DB038       | -9.1  | -7.9           | -7.7 | -6.7           | -5.6 | -7.41         | 0.86 | 0.19 | -7.81                           | -7.02 |
| DC001       | -6.3  | -6.1           | -5.9 | -5.2           | -4.8 | -5.69         | 0.53 | 0.11 | -5.93                           | -5.45 |
| DC002       | -6.8  | -6.1           | -5.8 | -5.4           | -4.9 | -5.77         | 0.57 | 0.12 | -6.03                           | -5.51 |
| DC003       | -6.2  | -5.9           | -5.6 | -4.9           | -4.5 | -5.48         | 0.52 | 0.11 | -5.71                           | -5.24 |
| DC004       | -6.2  | -6.0           | -5.7 | -5.2           | -4.7 | -5.63         | 0.44 | 0.10 | -5.84                           | -5.43 |
| DC005       | -7.1  | -6.4           | -5.9 | -5.6           | -4.8 | -5.96         | 0.61 | 0.13 | -6.23                           | -5.68 |
| DC006       | -7.1  | -6.5           | -6.1 | -5.6           | -4.8 | -6.01         | 0.62 | 0.13 | -6.29                           | -5.73 |
| DC007       | -10.1 | -8.7           | -7.9 | -7.1           | -6.5 | -7.96         | 1.01 | 0.22 | -8.42                           | -7.50 |
| DC008       | -10.3 | -8.6           | -8.1 | -7.5           | -6.8 | -8.17         | 0.91 | 0.20 | -8.58                           | -7.75 |
| DC009       | -5.7  | -5.4           | -5.1 | -4.7           | -4.2 | -5.06         | 0.45 | 0.10 | -5.27                           | -4.86 |
| DC010       | -5.4  | -4.9           | -4.5 | -4.3           | -3.8 | -4.57         | 0.44 | 0.10 | -4.77                           | -4.37 |
| DC011       | -6.4  | -6.0           | -5.7 | -5.1           | -4.6 | -5.57         | 0.54 | 0.12 | -5.81                           | -5.32 |
| DC012       | -6.3  | -5.5           | -5.0 | -4.7           | -4.2 | -5.04         | 0.54 | 0.12 | -5.29                           | -4.80 |
| DC013       | -6.8  | -5.6           | -4.9 | -4.5           | -3.5 | -5.01         | 0.85 | 0.19 | -5.40                           | -4.63 |
| DC014       | -5.2  | -4.4           | -4.1 | -3.8           | -3.6 | -4.13         | 0.43 | 0.09 | -4.33                           | -3.94 |
| DC015       | -4.1  | -3.5           | -3.3 | -3.1           | -2.8 | -3.30         | 0.34 | 0.07 | -3.45                           | -3.14 |
| DC016       | -9.1  | -7.9           | -7.5 | -6.7           | -5.8 | -7.40         | 0.94 | 0.21 | -7.83                           | -6.98 |
| DC017       | -6.5  | -5.6           | -5.4 | -4.8           | -4.6 | -5.32         | 0.49 | 0.11 | -5.54                           | -5.10 |
| DC018       | -3.6  | -2.9           | -2.8 | -2.6           | -2.4 | -2.81         | 0.28 | 0.06 | -2.94                           | -2.68 |



| Compound ID | Min  | 25%<br>Percentile | Med  | 75%<br>Percentile | Max  | Average<br>Value | SD   | SEM  | 95% Confidence<br>Interval of Mean |       |
|-------------|------|-------------------|------|-------------------|------|------------------|------|------|------------------------------------|-------|
|             |      |                   |      |                   |      |                  |      |      | Lower                              | Upper |
| DC019       | -5.0 | -4.7              | -4.4 | -4.1              | -3.8 | -4.41            | 0.37 | 0.08 | -4.58                              | -4.25 |
| DC020       | -5.2 | -4.9              | -4.5 | -4.2              | -3.9 | -4.53            | 0.40 | 0.09 | -4.72                              | -4.35 |
| DC021       | -6.5 | -6.0              | -5.5 | -4.7              | -3.7 | -5.30            | 0.91 | 0.20 | -5.72                              | -4.89 |
| DC022       | -6.9 | -6.0              | -5.4 | -4.9              | -4.4 | -5.52            | 0.74 | 0.16 | -5.85                              | -5.18 |
| DC023       | -6.4 | -5.6              | -5.0 | -4.5              | -3.8 | -5.09            | 0.77 | 0.17 | -5.43                              | -4.74 |
| DC024       | -6.8 | -6.4              | -6.0 | -5.5              | -4.8 | -5.90            | 0.61 | 0.13 | -6.18                              | -5.62 |
| DC025       | -9.4 | -8.0              | -7.3 | -6.8              | -5.9 | -7.45            | 0.98 | 0.21 | -7.90                              | -7.01 |
| DC026       | -7.7 | -6.1              | -5.4 | -5.2              | -4.4 | -5.59            | 0.75 | 0.16 | -5.93                              | -5.25 |
| DD001       | -8.0 | -7.2              | -7.0 | -6.7              | -5.6 | -6.94            | 0.68 | 0.15 | -7.25                              | -6.63 |
| DD002       | -9.1 | -7.6              | -7.4 | -6.8              | -5.7 | -7.21            | 0.82 | 0.18 | -7.59                              | -6.84 |
| DD003       | -7.5 | -6.5              | -6.4 | -6.0              | -5.1 | -6.27            | 0.63 | 0.14 | -6.55                              | -5.98 |
| DD004       | -7.8 | -6.9              | -6.7 | -6.3              | -5.0 | -6.57            | 0.65 | 0.14 | -6.86                              | -6.27 |
| DD005       | -9.4 | -7.7              | -7.3 | -6.9              | -5.8 | -7.30            | 0.86 | 0.19 | -7.69                              | -6.92 |
| DD006       | -9.6 | -7.9              | -7.5 | -6.8              | -5.9 | -7.43            | 0.86 | 0.19 | -7.82                              | -7.04 |
| DD007       | -9.0 | -7.5              | -7.0 | -6.7              | -5.7 | -7.09            | 0.83 | 0.18 | -7.47                              | -6.71 |
| DD008       | -7.8 | -6.8              | -6.4 | -6.0              | -4.9 | -6.37            | 0.67 | 0.15 | -6.68                              | -6.07 |
| DD009       | -8.3 | -7.6              | -7.1 | -6.3              | -5.6 | -7.02            | 0.80 | 0.18 | -7.38                              | -6.65 |
| DD010       | -9.6 | -7.6              | -7.3 | -6.7              | -5.4 | -7.27            | 0.99 | 0.21 | -7.72                              | -6.82 |
| DD011       | -8.3 | -7.3              | -6.8 | -6.2              | -5.4 | -6.78            | 0.79 | 0.17 | -7.14                              | -6.42 |
| DD012       | -8.9 | -7.8              | -7.1 | -6.7              | -5.8 | -7.22            | 0.84 | 0.18 | -7.60                              | -6.84 |
| DD013       | -8.2 | -7.1              | -6.9 | -6.5              | -5.2 | -6.76            | 0.83 | 0.18 | -7.14                              | -6.38 |
| DD014       | -8.7 | -7.8              | -7.3 | -6.4              | -5.6 | -7.16            | 0.85 | 0.19 | -7.55                              | -6.77 |
| DE001       | -6.2 | -5.5              | -5.1 | -4.4              | -4.0 | -4.97            | 0.68 | 0.15 | -5.28                              | -4.66 |
| DE002       | -6.9 | -5.5              | -5.1 | -4.6              | -4.0 | -5.10            | 0.71 | 0.16 | -5.42                              | -4.78 |
| DF001       | -8.0 | -7.4              | -7.0 | -6.1              | -5.5 | -6.82            | 0.74 | 0.16 | -7.16                              | -6.48 |
| DF002       | -7.5 | -7.1              | -6.5 | -6.0              | -5.2 | -6.49            | 0.68 | 0.15 | -6.80                              | -6.18 |
| DF003       | -8.1 | -7.1              | -6.7 | -6.2              | -5.5 | -6.71            | 0.75 | 0.16 | -7.05                              | -6.37 |
| DF004       | -7.6 | -6.7              | -6.1 | -5.8              | -4.9 | -6.26            | 0.74 | 0.16 | -6.60                              | -5.93 |
| DF005       | -7.9 | -6.9              | -6.5 | -6.0              | -5.2 | -6.52            | 0.72 | 0.16 | -6.85                              | -6.19 |
| DF006       | -8.9 | -7.9              | -7.2 | -6.5              | -5.5 | -7.20            | 0.88 | 0.19 | -7.60                              | -6.80 |
| DF007       | -8.5 | -7.8              | -7.0 | -6.6              | -5.3 | -7.14            | 0.85 | 0.19 | -7.53                              | -6.75 |

| Compound ID | Min  | 25%<br>Percentile | Med  | 75%<br>Percentile | Max  | Average<br>Value | SD   | SEM  | 95% Confidence<br>Interval of Mean |       |
|-------------|------|-------------------|------|-------------------|------|------------------|------|------|------------------------------------|-------|
|             |      |                   |      |                   |      |                  |      |      | Lower                              | Upper |
| DF008       | -9.4 | -7.6              | -6.9 | -6.6              | -5.9 | -7.12            | 0.91 | 0.20 | -7.54                              | -6.71 |
| DF009       | -7.8 | -7.0              | -6.4 | -6.1              | -5.1 | -6.51            | 0.71 | 0.15 | -6.83                              | -6.19 |
| DF010       | -8.7 | -7.4              | -7.1 | -6.7              | -5.1 | -6.99            | 0.74 | 0.16 | -7.33                              | -6.66 |
| DF011       | -7.9 | -6.8              | -6.3 | -5.9              | -5.2 | -6.40            | 0.71 | 0.16 | -6.73                              | -6.08 |
| DF012       | -7.9 | -7.0              | -6.5 | -6.0              | -5.0 | -6.51            | 0.74 | 0.16 | -6.85                              | -6.18 |
| DG001       | -5.8 | -5.4              | -5.2 | -4.9              | -4.4 | -5.10            | 0.38 | 0.08 | -5.27                              | -4.93 |
| DG002       | -5.5 | -4.9              | -4.7 | -4.4              | -4.0 | -4.69            | 0.39 | 0.09 | -4.87                              | -4.51 |
| DG003       | -5.8 | -5.3              | -5.1 | -4.8              | -4.2 | -5.03            | 0.43 | 0.09 | -5.23                              | -4.84 |
| DG004       | -7.1 | -6.0              | -5.7 | -5.4              | -5.0 | -5.79            | 0.50 | 0.11 | -6.02                              | -5.56 |
| DG005       | -6.2 | -5.4              | -5.2 | -4.9              | -4.4 | -5.17            | 0.41 | 0.09 | -5.35                              | -4.98 |
| DG006       | -5.4 | -4.8              | -4.6 | -4.5              | -4.0 | -4.64            | 0.36 | 0.08 | -4.80                              | -4.47 |
| DH001       | -5.3 | -5.0              | -4.6 | -4.3              | -4.0 | -4.62            | 0.41 | 0.09 | -4.81                              | -4.43 |
| DH002       | -5.4 | -5.2              | -4.7 | -4.4              | -3.8 | -4.73            | 0.49 | 0.11 | -4.96                              | -4.51 |
| DH003       | -5.3 | -4.9              | -4.6 | -4.3              | -4.0 | -4.58            | 0.38 | 0.08 | -4.75                              | -4.41 |
| DH004       | -5.4 | -4.9              | -4.7 | -4.3              | -4.1 | -4.67            | 0.41 | 0.09 | -4.86                              | -4.49 |
| DH005       | -7.0 | -6.4              | -5.8 | -5.3              | -4.8 | -5.82            | 0.64 | 0.14 | -6.11                              | -5.53 |
| DH006       | -5.4 | -4.9              | -4.6 | -4.3              | -3.8 | -4.64            | 0.45 | 0.10 | -4.84                              | -4.43 |
| DH007       | -5.0 | -4.5              | -4.3 | -3.9              | -3.4 | -4.24            | 0.40 | 0.09 | -4.42                              | -4.06 |
| DH008       | -5.9 | -5.3              | -5.1 | -4.7              | -4.3 | -5.11            | 0.45 | 0.10 | -5.31                              | -4.91 |
| DH009       | -4.7 | -4.3              | -4.1 | -3.9              | -3.3 | -4.05            | 0.38 | 0.08 | -4.23                              | -3.88 |
| DH010       | -5.6 | -5.1              | -4.8 | -4.5              | -4.0 | -4.78            | 0.41 | 0.09 | -4.96                              | -4.59 |
| DH011       | -4.7 | -4.2              | -3.9 | -3.8              | -3.3 | -3.97            | 0.32 | 0.07 | -4.11                              | -3.82 |
| DH012       | -6.1 | -5.4              | -5.3 | -4.9              | -4.5 | -5.20            | 0.40 | 0.09 | -5.38                              | -5.02 |
| DH013       | -5.2 | -4.8              | -4.5 | -4.1              | -3.7 | -4.47            | 0.45 | 0.10 | -4.67                              | -4.26 |
| DH014       | -7.9 | -7.1              | -6.8 | -6.2              | -5.0 | -6.56            | 0.75 | 0.16 | -6.90                              | -6.22 |
| DH015       | -7.0 | -6.4              | -5.9 | -5.3              | -4.6 | -5.88            | 0.65 | 0.14 | -6.18                              | -5.58 |
| DH016       | -5.6 | -4.6              | -4.5 | -4.3              | -3.9 | -4.53            | 0.41 | 0.09 | -4.72                              | -4.35 |
| DH017       | -4.7 | -4.1              | -3.9 | -3.6              | -3.2 | -3.88            | 0.40 | 0.09 | -4.06                              | -3.69 |
| DI001       | -7.6 | -7.0              | -6.5 | -6.0              | -5.2 | -6.46            | 0.70 | 0.15 | -6.78                              | -6.14 |
| DJ001       | -8.8 | -7.3              | -6.7 | -5.8              | -5.2 | -6.67            | 1.00 | 0.22 | -7.13                              | -6.21 |
| DJ002       | -3.9 | -3.6              | -3.3 | -3.1              | -2.8 | -3.35            | 0.29 | 0.06 | -3.48                              | -3.22 |

| Compound ID | Min   | 25%<br>Percentile | Med  | 75%<br>Percentile | Max  | Average<br>Value | SD   | SEM  | 95% Confidence<br>Interval of Mean |       |
|-------------|-------|-------------------|------|-------------------|------|------------------|------|------|------------------------------------|-------|
|             |       |                   |      |                   |      |                  |      |      | Lower                              | Upper |
| DK001       | -7.4  | -6.0              | -5.3 | -4.9              | -4.1 | -5.46            | 0.79 | 0.17 | -5.82                              | -5.10 |
| DL001       | -6.2  | -5.5              | -5.2 | -5.0              | -4.1 | -5.24            | 0.51 | 0.11 | -5.47                              | -5.01 |
| DL002       | -6.1  | -5.6              | -5.2 | -5.0              | -4.1 | -5.26            | 0.49 | 0.11 | -5.48                              | -5.03 |
| DL003       | -7.3  | -6.5              | -5.7 | -5.5              | -4.7 | -5.94            | 0.66 | 0.14 | -6.24                              | -5.64 |
| DL004       | -7.6  | -6.7              | -6.0 | -5.8              | -4.5 | -6.20            | 0.76 | 0.17 | -6.55                              | -5.85 |
| KA001       | -9.7  | -8.2              | -7.7 | -7.0              | -5.9 | -7.61            | 0.94 | 0.21 | -8.04                              | -7.18 |
| KA002       | -10.0 | -9.5              | -7.8 | -7.5              | -6.6 | -8.25            | 1.16 | 0.25 | -8.78                              | -7.73 |
| KA003       | -9.1  | -8.2              | -7.8 | -6.7              | -5.9 | -7.57            | 0.94 | 0.21 | -8.00                              | -7.14 |
| KA004       | -9.4  | -8.3              | -7.6 | -6.8              | -6.1 | -7.61            | 0.95 | 0.21 | -8.04                              | -7.17 |
| KA005       | -8.9  | -8.0              | -7.6 | -6.7              | -5.8 | -7.38            | 0.94 | 0.21 | -7.81                              | -6.95 |
| KA006       | -8.9  | -8.1              | -7.5 | -6.8              | -6.2 | -7.48            | 0.73 | 0.16 | -7.81                              | -7.14 |
| KA007       | -9.0  | -8.1              | -7.6 | -6.7              | -6.1 | -7.46            | 0.79 | 0.17 | -7.82                              | -7.10 |
| KA008       | -8.6  | -8.0              | -7.6 | -6.8              | -6.1 | -7.45            | 0.74 | 0.16 | -7.79                              | -7.12 |
| KA009       | -8.6  | -8.0              | -7.7 | -7.0              | -6.0 | -7.51            | 0.75 | 0.16 | -7.85                              | -7.17 |
| KA010       | -9.3  | -8.5              | -7.6 | -6.6              | -6.2 | -7.60            | 0.98 | 0.21 | -8.04                              | -7.15 |
| KA011       | -9.5  | -8.6              | -8.1 | -7.2              | -6.4 | -7.97            | 0.91 | 0.20 | -8.38                              | -7.55 |
| KA012       | -9.4  | -8.8              | -7.9 | -7.3              | -6.8 | -8.02            | 0.87 | 0.19 | -8.42                              | -7.62 |
| KA013       | -10.3 | -9.2              | -8.8 | -7.8              | -6.9 | -8.60            | 0.99 | 0.22 | -9.05                              | -8.15 |
| KA014       | -9.1  | -8.8              | -8.2 | -7.0              | -6.6 | -7.96            | 0.91 | 0.20 | -8.37                              | -7.54 |
| KA015       | -9.2  | -7.9              | -7.6 | -6.9              | -5.8 | -7.40            | 0.83 | 0.18 | -7.78                              | -7.03 |
| KA016       | -9.4  | -8.0              | -7.5 | -6.7              | -6.0 | -7.40            | 0.81 | 0.18 | -7.77                              | -7.04 |
| KA017       | -9.1  | -8.0              | -7.6 | -7.1              | -5.7 | -7.47            | 0.84 | 0.18 | -7.85                              | -7.09 |
| KA018       | -9.2  | -8.7              | -8.3 | -7.1              | -6.2 | -7.98            | 0.92 | 0.20 | -8.40                              | -7.56 |
| KA019       | -11.0 | -8.4              | -8.2 | -7.8              | -7.2 | -8.38            | 1.04 | 0.23 | -8.85                              | -7.91 |
| KA020       | -9.5  | -8.1              | -7.8 | -6.8              | -6.0 | -7.60            | 0.94 | 0.21 | -8.03                              | -7.17 |
| KA021       | -9.5  | -8.4              | -7.9 | -7.3              | -5.9 | -7.82            | 0.95 | 0.21 | -8.26                              | -7.39 |
| KA022       | -9.2  | -8.5              | -7.8 | -7.0              | -5.9 | -7.81            | 0.95 | 0.21 | -8.24                              | -7.38 |
| KA023       | -10.1 | -8.4              | -7.9 | -7.1              | -6.4 | -7.87            | 0.98 | 0.21 | -8.31                              | -7.42 |
| KA024       | -8.6  | -8.0              | -7.3 | -6.7              | -6.0 | -7.28            | 0.79 | 0.17 | -7.64                              | -6.92 |
| KA025       | -9.4  | -7.6              | -7.0 | -6.6              | -5.8 | -7.14            | 0.97 | 0.21 | -7.59                              | -6.70 |
| KA026       | -9.5  | -8.3              | -7.6 | -6.8              | -5.9 | -7.53            | 1.01 | 0.22 | -7.99                              | -7.07 |

| Compound ID | Min  | 25% Percentile | Med  | 75% Percentile | Max  | Average Value | SD   | SEM  | 95% Confidence Interval of Mean |       |
|-------------|------|----------------|------|----------------|------|---------------|------|------|---------------------------------|-------|
|             |      |                |      |                |      |               |      |      | Lower                           | Upper |
| KA027       | -9.0 | -8.4           | -7.8 | -6.8           | -5.8 | -7.66         | 0.90 | 0.20 | -8.07                           | -7.25 |
| KA028       | -8.8 | -8.1           | -7.5 | -6.6           | -5.7 | -7.42         | 0.98 | 0.21 | -7.86                           | -6.97 |
| KA029       | -9.2 | -8.3           | -7.5 | -6.9           | -6.4 | -7.60         | 0.87 | 0.19 | -8.00                           | -7.21 |
| KA030       | -9.9 | -8.3           | -8.0 | -7.0           | -6.4 | -7.81         | 0.92 | 0.20 | -8.23                           | -7.39 |
| KA031       | -8.9 | -8.4           | -7.5 | -6.8           | -6.1 | -7.56         | 0.87 | 0.19 | -7.95                           | -7.16 |
| KA032       | -9.3 | -8.3           | -7.9 | -7.1           | -6.2 | -7.80         | 0.92 | 0.20 | -8.22                           | -7.39 |
| KA033       | -9.7 | -8.0           | -7.3 | -6.7           | -5.9 | -7.40         | 0.99 | 0.22 | -7.85                           | -6.95 |
| KA034       | -8.7 | -7.5           | -7.2 | -6.9           | -6.0 | -7.23         | 0.72 | 0.16 | -7.56                           | -6.90 |
| KA035       | -9.2 | -8.3           | -7.7 | -6.9           | -6.2 | -7.67         | 0.88 | 0.19 | -8.07                           | -7.26 |
| KA036       | -8.7 | -8.2           | -7.4 | -6.8           | -5.8 | -7.44         | 0.86 | 0.19 | -7.83                           | -7.05 |
| KA037       | -8.4 | -7.6           | -7.2 | -6.6           | -5.9 | -7.13         | 0.75 | 0.16 | -7.47                           | -6.79 |
| KA038       | -8.8 | -8.4           | -7.6 | -6.7           | -5.9 | -7.50         | 0.89 | 0.19 | -7.91                           | -7.09 |
| KA039       | -8.8 | -8.1           | -7.7 | -6.8           | -6.5 | -7.60         | 0.73 | 0.16 | -7.93                           | -7.26 |
| KA040       | -9.2 | -8.0           | -7.1 | -6.7           | -5.7 | -7.37         | 0.99 | 0.22 | -7.82                           | -6.92 |
| KA041       | -8.6 | -8.3           | -7.6 | -6.9           | -6.2 | -7.61         | 0.76 | 0.17 | -7.96                           | -7.27 |
| KA042       | -9.0 | -8.1           | -7.5 | -7.0           | -5.8 | -7.47         | 0.86 | 0.19 | -7.86                           | -7.08 |
| KA043       | -8.7 | -8.1           | -7.4 | -6.9           | -6.1 | -7.48         | 0.78 | 0.17 | -7.84                           | -7.12 |
| KA044       | -9.2 | -8.4           | -7.9 | -7.0           | -6.2 | -7.76         | 0.90 | 0.20 | -8.17                           | -7.35 |
| KA046       | -9.0 | -8.2           | -7.9 | -6.8           | -5.8 | -7.57         | 0.88 | 0.19 | -7.97                           | -7.16 |
| KA047       | -9.4 | -8.2           | -7.7 | -7.2           | -6.1 | -7.64         | 0.86 | 0.19 | -8.04                           | -7.25 |
| KA049       | -8.7 | -8.4           | -7.5 | -6.5           | -5.9 | -7.48         | 0.95 | 0.21 | -7.92                           | -7.05 |
| KA050       | -9.3 | -7.4           | -7.0 | -6.2           | -5.3 | -6.82         | 0.93 | 0.20 | -7.25                           | -6.40 |
| KA051       | -8.5 | -7.8           | -7.4 | -6.6           | -5.7 | -7.31         | 0.85 | 0.18 | -7.70                           | -6.93 |
| KA052       | -9.2 | -8.1           | -7.4 | -6.5           | -5.8 | -7.30         | 1.05 | 0.23 | -7.78                           | -6.82 |
| KA053       | -8.7 | -7.8           | -7.3 | -6.6           | -5.4 | -7.13         | 0.97 | 0.21 | -7.57                           | -6.68 |
| KA054       | -8.3 | -7.6           | -7.0 | -6.3           | -5.3 | -6.90         | 0.86 | 0.19 | -7.29                           | -6.51 |
| KA055       | -8.6 | -8.0           | -7.4 | -6.8           | -6.2 | -7.37         | 0.77 | 0.17 | -7.72                           | -7.02 |
| KA056       | -8.7 | -8.1           | -7.4 | -6.7           | -5.6 | -7.26         | 0.95 | 0.21 | -7.69                           | -6.82 |
| KA057       | -8.4 | -8.0           | -7.5 | -6.6           | -6.1 | -7.31         | 0.80 | 0.17 | -7.68                           | -6.95 |
| KA058       | -8.6 | -7.8           | -7.3 | -6.4           | -5.4 | -7.12         | 0.87 | 0.19 | -7.51                           | -6.72 |
| KA059       | -8.5 | -7.7           | -7.2 | -6.8           | -6.0 | -7.22         | 0.77 | 0.17 | -7.57                           | -6.87 |

| Compound ID | Min   | 25% Percentile | Med  | 75% Percentile | Max  | Average Value | SD   | SEM  | 95% Confidence Interval of Mean |       |
|-------------|-------|----------------|------|----------------|------|---------------|------|------|---------------------------------|-------|
|             |       |                |      |                |      |               |      |      | Lower                           | Upper |
| KA060       | -9.9  | -9.2           | -8.5 | -7.6           | -6.8 | -8.48         | 0.90 | 0.20 | -8.89                           | -8.06 |
| KA061       | -8.5  | -8.3           | -7.4 | -6.9           | -5.9 | -7.50         | 0.86 | 0.19 | -7.89                           | -7.10 |
| KA062       | -8.5  | -7.9           | -7.5 | -6.7           | -5.8 | -7.34         | 0.75 | 0.16 | -7.68                           | -7.00 |
| KA064       | -9.8  | -8.8           | -8.3 | -7.6           | -5.8 | -8.07         | 1.15 | 0.25 | -8.59                           | -7.55 |
| KA065       | -10.7 | -9.0           | -8.6 | -7.5           | -6.9 | -8.46         | 1.10 | 0.24 | -8.96                           | -7.96 |
| KA066       | -10.3 | -8.6           | -8.0 | -7.2           | -6.6 | -7.97         | 0.90 | 0.20 | -8.38                           | -7.56 |
| KA067       | -10.4 | -8.9           | -8.4 | -7.5           | -6.4 | -8.33         | 1.03 | 0.22 | -8.80                           | -7.87 |
| KA068       | -8.9  | -7.8           | -7.1 | -6.5           | -5.3 | -7.08         | 0.95 | 0.21 | -7.51                           | -6.64 |
| KA069       | -9.6  | -8.4           | -7.6 | -7.1           | -6.3 | -7.72         | 0.94 | 0.20 | -8.15                           | -7.30 |
| KA070       | -8.6  | -8.1           | -7.7 | -6.9           | -5.8 | -7.39         | 0.84 | 0.18 | -7.77                           | -7.01 |
| KA071       | -9.5  | -8.6           | -7.8 | -7.2           | -6.3 | -7.88         | 0.96 | 0.21 | -8.32                           | -7.44 |
| KA072       | -8.9  | -7.9           | -7.2 | -6.7           | -5.7 | -7.36         | 0.86 | 0.19 | -7.75                           | -6.97 |
| KA073       | -9.2  | -8.2           | -7.3 | -6.9           | -6.0 | -7.50         | 0.93 | 0.20 | -7.92                           | -7.07 |
| KA074       | -9.4  | -7.9           | -7.3 | -6.5           | -6.0 | -7.34         | 0.91 | 0.20 | -7.75                           | -6.92 |
| KA075       | -8.5  | -7.4           | -6.9 | -6.5           | -5.8 | -7.04         | 0.84 | 0.18 | -7.42                           | -6.66 |
| KA076       | -8.7  | -8.1           | -7.3 | -6.6           | -5.5 | -7.28         | 0.82 | 0.18 | -7.66                           | -6.91 |
| KA077       | -8.7  | -8.2           | -7.1 | -6.3           | -5.6 | -7.17         | 1.08 | 0.24 | -7.66                           | -6.68 |
| KA078       | -8.7  | -7.9           | -7.4 | -7.0           | -5.9 | -7.45         | 0.81 | 0.18 | -7.81                           | -7.08 |
| KA079       | -10.6 | -9.4           | -8.4 | -7.6           | -6.6 | -8.46         | 1.05 | 0.23 | -8.94                           | -7.98 |
| KA080       | -8.8  | -7.7           | -7.4 | -6.7           | -5.5 | -7.24         | 0.79 | 0.17 | -7.60                           | -6.88 |
| KA081       | -9.3  | -8.2           | -7.5 | -6.6           | -5.7 | -7.40         | 0.98 | 0.21 | -7.85                           | -6.95 |
| KA082       | -9.1  | -7.7           | -7.3 | -6.8           | -5.7 | -7.20         | 0.93 | 0.20 | -7.63                           | -6.78 |
| KA083       | -8.7  | -7.9           | -7.4 | -6.8           | -5.7 | -7.36         | 0.88 | 0.19 | -7.76                           | -6.96 |
| KA084       | -9.1  | -7.9           | -7.6 | -7.0           | -6.1 | -7.45         | 0.80 | 0.18 | -7.82                           | -7.09 |
| KA085       | -9.0  | -7.6           | -7.2 | -6.6           | -5.8 | -7.15         | 0.80 | 0.17 | -7.52                           | -6.79 |
| KA086       | -10.7 | -9.3           | -8.3 | -7.8           | -7.0 | -8.52         | 1.07 | 0.23 | -9.01                           | -8.03 |
| KA088       | -10.9 | -8.6           | -8.2 | -7.3           | -6.3 | -8.04         | 1.08 | 0.23 | -8.53                           | -7.55 |
| KA089       | -10.2 | -8.6           | -8.3 | -7.4           | -6.3 | -7.98         | 0.93 | 0.20 | -8.40                           | -7.56 |
| KA090       | -12.0 | -9.4           | -8.4 | -8.3           | -7.0 | -8.66         | 1.15 | 0.25 | -9.18                           | -8.14 |
| KA091       | -11.6 | -9.3           | -8.2 | -7.3           | -6.7 | -8.37         | 1.24 | 0.27 | -8.93                           | -7.80 |
| KA092       | -10.6 | -8.9           | -8.4 | -7.5           | -6.7 | -8.28         | 1.03 | 0.23 | -8.75                           | -7.81 |

| Compound ID | Min   | 25%<br>Percentile | Med  | 75%<br>Percentile | Max  | Average<br>Value | SD   | SEM  | 95% Confidence<br>Interval of Mean |       |
|-------------|-------|-------------------|------|-------------------|------|------------------|------|------|------------------------------------|-------|
|             |       |                   |      |                   |      |                  |      |      | Lower                              | Upper |
| KA093       | -10.0 | -8.6              | -8.4 | -7.8              | -6.9 | -8.32            | 0.88 | 0.19 | -8.72                              | -7.92 |
| KA094       | -10.3 | -9.1              | -8.1 | -7.8              | -6.9 | -8.29            | 0.96 | 0.21 | -8.72                              | -7.85 |
| KA095       | -11.3 | -9.0              | -8.1 | -7.4              | -6.7 | -8.30            | 1.16 | 0.25 | -8.82                              | -7.77 |
| KA096       | -11.4 | -8.5              | -8.1 | -7.7              | -6.4 | -8.20            | 1.08 | 0.23 | -8.69                              | -7.71 |
| KA097       | -10.3 | -9.0              | -7.9 | -7.6              | -6.7 | -8.16            | 1.00 | 0.22 | -8.62                              | -7.70 |
| KA098       | -11.3 | -9.2              | -8.2 | -7.3              | -6.7 | -8.40            | 1.20 | 0.26 | -8.95                              | -7.85 |
| KA099       | -9.6  | -8.3              | -8.1 | -7.6              | -6.7 | -8.10            | 0.81 | 0.18 | -8.46                              | -7.73 |
| KA100       | -11.6 | -9.3              | -8.6 | -7.9              | -7.0 | -8.62            | 1.16 | 0.25 | -9.15                              | -8.09 |
| KA101       | -10.8 | -9.0              | -7.8 | -7.2              | -6.5 | -8.11            | 1.08 | 0.23 | -8.60                              | -7.62 |
| KA102       | -10.6 | -8.8              | -8.1 | -7.5              | -6.5 | -8.10            | 1.07 | 0.23 | -8.59                              | -7.62 |
| KA103       | -9.5  | -8.7              | -8.3 | -7.5              | -6.7 | -8.08            | 0.87 | 0.19 | -8.47                              | -7.68 |
| KA104       | -11.1 | -8.5              | -7.8 | -7.4              | -5.9 | -7.80            | 1.13 | 0.25 | -8.32                              | -7.29 |
| KA105       | -11.4 | -9.2              | -8.0 | -7.8              | -6.7 | -8.36            | 1.12 | 0.24 | -8.87                              | -7.85 |
| KA106       | -11.1 | -8.4              | -8.1 | -7.7              | -6.2 | -8.10            | 1.11 | 0.24 | -8.60                              | -7.60 |
| KA107       | -10.3 | -9.2              | -8.4 | -7.6              | -6.6 | -8.27            | 1.06 | 0.23 | -8.75                              | -7.79 |
| KA108       | -9.5  | -8.3              | -7.1 | -6.7              | -6.0 | -7.47            | 1.03 | 0.22 | -7.94                              | -7.00 |
| KA109       | -9.8  | -8.8              | -8.0 | -7.4              | -6.6 | -8.14            | 1.05 | 0.23 | -8.62                              | -7.67 |
| KA110       | -9.7  | -8.8              | -7.8 | -7.0              | -6.1 | -7.92            | 1.08 | 0.24 | -8.41                              | -7.43 |
| KA113       | -11.7 | -9.7              | -8.5 | -7.9              | -7.2 | -8.70            | 1.20 | 0.26 | -9.25                              | -8.15 |
| KA114       | -8.6  | -8.0              | -7.6 | -7.1              | -5.9 | -7.46            | 0.74 | 0.16 | -7.80                              | -7.13 |
| KA115       | -10.1 | -8.8              | -8.6 | -8.1              | -7.2 | -8.54            | 0.84 | 0.18 | -8.92                              | -8.16 |
| KA116       | -9.6  | -8.4              | -7.9 | -7.4              | -6.1 | -7.88            | 0.95 | 0.21 | -8.31                              | -7.44 |
| KA120       | -8.4  | -8.0              | -7.4 | -6.8              | -5.5 | -7.36            | 0.83 | 0.18 | -7.74                              | -6.98 |
| KA121       | -10.2 | -8.7              | -7.7 | -7.2              | -6.3 | -7.99            | 0.98 | 0.21 | -8.43                              | -7.55 |
| KA122       | -9.4  | -9.0              | -7.8 | -7.5              | -6.6 | -8.08            | 0.91 | 0.20 | -8.49                              | -7.67 |
| KA126       | -8.6  | -7.2              | -6.8 | -6.3              | -5.5 | -6.77            | 0.74 | 0.16 | -7.11                              | -6.43 |
| KA127       | -8.9  | -7.8              | -7.3 | -6.5              | -5.9 | -7.34            | 0.90 | 0.20 | -7.75                              | -6.93 |
| KA128       | -8.7  | -8.0              | -7.0 | -6.5              | -6.0 | -7.22            | 0.83 | 0.18 | -7.59                              | -6.84 |
| KA129       | -8.9  | -7.9              | -7.0 | -6.3              | -5.7 | -7.16            | 0.89 | 0.19 | -7.56                              | -6.75 |
| KA130       | -8.6  | -8.0              | -7.6 | -7.0              | -6.2 | -7.58            | 0.69 | 0.15 | -7.89                              | -7.26 |
| KA131       | -10.4 | -8.9              | -8.2 | -7.4              | -6.5 | -8.24            | 1.07 | 0.23 | -8.72                              | -7.75 |

| Compound ID | Min   | 25% Percentile | Med  | 75% Percentile | Max  | Average Value | SD   | SEM  | 95% Confidence Interval of Mean |       |
|-------------|-------|----------------|------|----------------|------|---------------|------|------|---------------------------------|-------|
|             |       |                |      |                |      |               |      |      | Lower                           | Upper |
| KA132       | -8.0  | -7.8           | -7.1 | -6.6           | -5.9 | -7.14         | 0.67 | 0.15 | -7.44                           | -6.83 |
| KA133       | -9.5  | -8.2           | -6.8 | -5.9           | -5.2 | -7.10         | 1.37 | 0.30 | -7.72                           | -6.47 |
| KA134       | -10.3 | -8.4           | -7.7 | -6.5           | -4.9 | -7.55         | 1.43 | 0.31 | -8.20                           | -6.90 |
| KA135       | -9.8  | -8.2           | -7.6 | -6.8           | -5.7 | -7.61         | 0.96 | 0.21 | -8.05                           | -7.17 |
| KA136       | -9.2  | -8.4           | -7.5 | -7.3           | -6.0 | -7.66         | 0.88 | 0.19 | -8.06                           | -7.25 |
| KA137       | -9.0  | -8.5           | -7.9 | -7.2           | -6.2 | -7.74         | 0.83 | 0.18 | -8.12                           | -7.37 |
| KA138       | -9.2  | -8.2           | -7.9 | -7.2           | -5.9 | -7.76         | 0.81 | 0.18 | -8.13                           | -7.39 |
| KA139       | -10.0 | -8.6           | -8.3 | -7.0           | -5.9 | -7.90         | 1.11 | 0.24 | -8.40                           | -7.39 |
| KA142       | -8.9  | -8.4           | -7.8 | -6.8           | -6.0 | -7.66         | 0.91 | 0.20 | -8.07                           | -7.25 |
| KA144       | -10.3 | -8.8           | -8.1 | -7.7           | -6.7 | -8.29         | 1.05 | 0.23 | -8.77                           | -7.81 |
| KA145       | -10.5 | -9.1           | -8.1 | -7.7           | -6.7 | -8.38         | 1.07 | 0.23 | -8.86                           | -7.89 |
| KA146       | -8.8  | -8.0           | -7.9 | -6.7           | -6.1 | -7.47         | 0.82 | 0.18 | -7.84                           | -7.10 |
| KA148       | -10.0 | -8.7           | -8.2 | -7.2           | -5.9 | -7.94         | 1.12 | 0.25 | -8.45                           | -7.43 |
| KA149       | -10.3 | -8.9           | -8.2 | -7.3           | -6.5 | -8.16         | 1.12 | 0.24 | -8.67                           | -7.65 |
| KA150       | -9.2  | -8.4           | -7.9 | -7.1           | -6.0 | -7.82         | 0.87 | 0.19 | -8.22                           | -7.43 |
| KA151       | -8.7  | -8.1           | -7.4 | -6.8           | -6.0 | -7.35         | 0.88 | 0.19 | -7.75                           | -6.95 |
| KA152       | -8.7  | -7.6           | -7.2 | -6.5           | -5.3 | -7.09         | 0.94 | 0.21 | -7.52                           | -6.66 |
| KA153       | -10.1 | -8.3           | -7.9 | -7.4           | -6.4 | -8.06         | 0.99 | 0.22 | -8.51                           | -7.61 |
| KA154       | -7.1  | -6.8           | -6.3 | -5.9           | -4.8 | -6.26         | 0.66 | 0.14 | -6.56                           | -5.96 |
| KA155       | -8.5  | -8.2           | -7.7 | -6.8           | -6.1 | -7.45         | 0.79 | 0.17 | -7.81                           | -7.09 |
| KA156       | -9.0  | -8.0           | -7.3 | -6.9           | -5.6 | -7.42         | 0.93 | 0.20 | -7.85                           | -7.00 |
| KA157       | -8.9  | -8.3           | -7.9 | -7.0           | -6.6 | -7.78         | 0.75 | 0.16 | -8.12                           | -7.44 |
| KA158       | -9.5  | -8.3           | -8.0 | -7.3           | -6.1 | -7.78         | 0.84 | 0.18 | -8.16                           | -7.39 |
| KA159       | -11.1 | -8.7           | -8.3 | -7.2           | -6.3 | -8.08         | 1.09 | 0.24 | -8.58                           | -7.59 |
| KA160       | -10.4 | -9.3           | -8.4 | -7.5           | -6.6 | -8.36         | 1.13 | 0.25 | -8.87                           | -7.85 |
| KA161       | -9.3  | -8.1           | -7.6 | -7.2           | -5.9 | -7.56         | 0.84 | 0.18 | -7.94                           | -7.18 |
| KA162       | -9.6  | -7.9           | -7.6 | -7.0           | -5.7 | -7.59         | 0.90 | 0.20 | -7.99                           | -7.18 |
| KA163       | -8.7  | -8.2           | -7.5 | -6.8           | -5.4 | -7.45         | 0.84 | 0.18 | -7.84                           | -7.07 |
| KA164       | -8.8  | -8.1           | -7.5 | -6.7           | -6.0 | -7.48         | 0.83 | 0.18 | -7.86                           | -7.10 |
| KA165       | -11.4 | -10.4          | -9.2 | -8.8           | -7.4 | -9.40         | 1.14 | 0.25 | -9.92                           | -8.88 |
| KA166       | -8.0  | -7.5           | -7.0 | -6.3           | -5.5 | -6.89         | 0.78 | 0.17 | -7.24                           | -6.54 |

| Compound ID | Min   | 25%<br>Percentile | Med  | 75%<br>Percentile | Max  | Average<br>Value | SD   | SEM  | 95% Confidence<br>Interval of Mean |       |
|-------------|-------|-------------------|------|-------------------|------|------------------|------|------|------------------------------------|-------|
|             |       |                   |      |                   |      |                  |      |      | Lower                              | Upper |
| KA168       | -10.1 | -8.6              | -8.1 | -7.2              | -6.5 | -8.07            | 1.04 | 0.23 | -8.54                              | -7.60 |
| KA169       | -9.2  | -7.7              | -7.3 | -6.5              | -5.6 | -7.24            | 0.95 | 0.21 | -7.67                              | -6.80 |
| KA170       | -8.9  | -8.5              | -7.7 | -6.9              | -6.3 | -7.65            | 0.85 | 0.19 | -8.04                              | -7.26 |
| KA171       | -9.6  | -8.1              | -7.8 | -7.2              | -5.9 | -7.65            | 0.79 | 0.17 | -8.01                              | -7.29 |
| KA172       | -9.4  | -8.0              | -7.5 | -7.2              | -6.0 | -7.53            | 0.79 | 0.17 | -7.89                              | -7.17 |
| KA173       | -11.4 | -9.1              | -8.1 | -7.8              | -6.7 | -8.43            | 1.15 | 0.25 | -8.95                              | -7.91 |
| KA174       | -9.1  | -8.2              | -7.6 | -6.8              | -6.0 | -7.62            | 0.99 | 0.22 | -8.08                              | -7.17 |
| KA175       | -10.9 | -8.7              | -7.8 | -7.4              | -6.5 | -8.09            | 1.17 | 0.25 | -8.62                              | -7.55 |
| KA176       | -11.4 | -8.7              | -8.2 | -7.5              | -6.1 | -8.09            | 1.15 | 0.25 | -8.62                              | -7.57 |
| KA177       | -9.7  | -8.1              | -7.7 | -6.9              | -5.8 | -7.51            | 0.94 | 0.21 | -7.94                              | -7.08 |
| KA178       | -9.1  | -8.2              | -7.6 | -6.7              | -6.3 | -7.56            | 0.85 | 0.18 | -7.95                              | -7.18 |
| KA179       | -11.4 | -9.4              | -8.4 | -7.8              | -6.5 | -8.55            | 1.30 | 0.28 | -9.15                              | -7.96 |
| KB001       | -8.8  | -7.5              | -6.9 | -6.0              | -5.4 | -6.90            | 0.96 | 0.21 | -7.34                              | -6.46 |
| KB002       | -8.5  | -7.4              | -7.1 | -6.0              | -5.2 | -6.90            | 0.95 | 0.21 | -7.33                              | -6.46 |
| KB003       | -9.8  | -8.0              | -7.2 | -6.3              | -5.6 | -7.18            | 1.04 | 0.23 | -7.65                              | -6.71 |
| KB004       | -8.5  | -7.9              | -6.9 | -6.3              | -5.2 | -6.98            | 0.95 | 0.21 | -7.41                              | -6.54 |
| KB005       | -9.7  | -8.0              | -6.8 | -6.2              | -5.2 | -7.03            | 1.08 | 0.24 | -7.53                              | -6.54 |
| KB006       | -9.4  | -7.7              | -7.3 | -6.9              | -5.8 | -7.24            | 0.93 | 0.20 | -7.66                              | -6.82 |
| KB007       | -9.3  | -8.1              | -7.4 | -6.6              | -5.7 | -7.32            | 1.00 | 0.22 | -7.78                              | -6.87 |
| KB008       | -8.2  | -7.7              | -7.0 | -6.5              | -5.5 | -6.99            | 0.85 | 0.18 | -7.37                              | -6.60 |
| KB009       | -9.4  | -7.6              | -7.2 | -6.5              | -5.6 | -7.18            | 0.95 | 0.21 | -7.62                              | -6.75 |
| KB010       | -8.8  | -7.4              | -7.0 | -6.3              | -5.4 | -6.90            | 0.89 | 0.19 | -7.30                              | -6.49 |
| KB013       | -8.6  | -7.8              | -7.1 | -6.6              | -5.2 | -7.11            | 0.95 | 0.21 | -7.54                              | -6.68 |
| KB014       | -8.8  | -7.5              | -7.0 | -6.2              | -5.7 | -7.06            | 0.92 | 0.20 | -7.48                              | -6.64 |
| KB015       | -9.2  | -7.8              | -7.4 | -6.9              | -5.8 | -7.33            | 1.00 | 0.22 | -7.78                              | -6.87 |
| KB016       | -9.7  | -7.8              | -7.4 | -6.7              | -5.8 | -7.40            | 0.97 | 0.21 | -7.84                              | -6.95 |
| KB017       | -9.1  | -7.5              | -6.8 | -6.1              | -5.3 | -6.87            | 0.98 | 0.21 | -7.31                              | -6.42 |
| KB019       | -8.3  | -7.5              | -7.0 | -6.6              | -5.3 | -6.92            | 0.82 | 0.18 | -7.29                              | -6.55 |
| KB020       | -9.1  | -7.7              | -7.3 | -6.3              | -5.7 | -7.23            | 1.03 | 0.22 | -7.70                              | -6.76 |
| KB023       | -7.8  | -6.7              | -6.3 | -5.9              | -4.7 | -6.30            | 0.92 | 0.20 | -6.72                              | -5.88 |
| KB024       | -7.8  | -6.9              | -6.3 | -5.7              | -4.9 | -6.28            | 0.92 | 0.20 | -6.70                              | -5.86 |



| Compound ID | Min   | 25% Percentile | Med   | 75% Percentile | Max  | Average Value | SD   | SEM  | 95% Confidence Interval of Mean |       |
|-------------|-------|----------------|-------|----------------|------|---------------|------|------|---------------------------------|-------|
|             |       |                |       |                |      |               |      |      | Lower                           | Upper |
| KB025       | -8.9  | -7.6           | -7.2  | -6.2           | -5.3 | -6.99         | 1.01 | 0.22 | -7.44                           | -6.53 |
| KB026       | -8.2  | -7.7           | -6.8  | -5.9           | -5.3 | -6.86         | 0.98 | 0.21 | -7.30                           | -6.41 |
| KB027       | -8.4  | -6.8           | -6.3  | -6.1           | -5.2 | -6.44         | 0.81 | 0.18 | -6.80                           | -6.07 |
| KB028       | -9.7  | -8.0           | -7.3  | -6.3           | -5.4 | -7.29         | 1.09 | 0.24 | -7.78                           | -6.79 |
| KB029       | -9.9  | -7.9           | -7.2  | -6.4           | -5.4 | -7.19         | 1.05 | 0.23 | -7.67                           | -6.71 |
| KB030       | -12.3 | -10.5          | -9.6  | -8.3           | -7.0 | -9.39         | 1.44 | 0.31 | -10.05                          | -8.74 |
| KB031       | -12.5 | -11.0          | -10.0 | -8.5           | -8.0 | -9.80         | 1.38 | 0.30 | -10.42                          | -9.17 |
| KB032       | -11.9 | -10.4          | -9.2  | -8.2           | -6.3 | -9.26         | 1.42 | 0.31 | -9.91                           | -8.61 |
| KB033       | -11.3 | -10.1          | -9.3  | -8.7           | -7.5 | -9.43         | 1.03 | 0.22 | -9.90                           | -8.96 |
| KB034       | -12.1 | -9.7           | -8.7  | -8.3           | -7.7 | -9.22         | 1.26 | 0.28 | -9.79                           | -8.64 |
| KB035       | -11.0 | -9.3           | -8.4  | -7.5           | -6.6 | -8.50         | 1.27 | 0.28 | -9.08                           | -7.93 |
| KB036       | -9.1  | -7.8           | -7.1  | -6.1           | -5.4 | -7.00         | 1.00 | 0.22 | -7.45                           | -6.54 |
| KB038       | -9.1  | -8.0           | -7.1  | -6.3           | -5.5 | -7.18         | 0.97 | 0.21 | -7.62                           | -6.73 |
| KB039       | -8.8  | -7.3           | -7.0  | -6.4           | -5.6 | -7.00         | 0.82 | 0.18 | -7.38                           | -6.63 |
| KB040       | -8.1  | -7.4           | -6.7  | -6.0           | -5.1 | -6.68         | 0.86 | 0.19 | -7.07                           | -6.29 |
| KB041       | -9.6  | -7.9           | -7.4  | -6.6           | -5.3 | -7.32         | 1.02 | 0.22 | -7.78                           | -6.85 |
| KB042       | -8.5  | -8.0           | -7.6  | -6.7           | -5.6 | -7.39         | 0.78 | 0.17 | -7.74                           | -7.03 |
| KB043       | -8.9  | -7.9           | -7.2  | -6.4           | -5.4 | -7.12         | 0.92 | 0.20 | -7.54                           | -6.70 |
| KB044       | -8.8  | -7.8           | -7.1  | -6.4           | -5.3 | -7.14         | 0.82 | 0.18 | -7.51                           | -6.76 |
| KB045       | -8.8  | -7.5           | -7.0  | -6.3           | -5.5 | -6.99         | 0.86 | 0.19 | -7.38                           | -6.59 |
| KB046       | -9.1  | -7.6           | -7.3  | -6.5           | -5.6 | -7.11         | 0.89 | 0.19 | -7.52                           | -6.70 |
| KB047       | -9.1  | -8.0           | -7.3  | -6.5           | -5.4 | -7.30         | 0.94 | 0.20 | -7.73                           | -6.88 |
| KB050       | -9.4  | -8.7           | -8.3  | -7.3           | -6.4 | -8.08         | 0.92 | 0.20 | -8.50                           | -7.66 |
| KC001       | -10.1 | -9.0           | -8.1  | -7.2           | -6.4 | -8.11         | 1.10 | 0.24 | -8.61                           | -7.61 |
| KC002       | -10.1 | -8.4           | -7.9  | -7.2           | -6.5 | -7.95         | 0.99 | 0.22 | -8.41                           | -7.50 |
| KC003       | -10.6 | -8.7           | -8.1  | -7.5           | -6.8 | -8.30         | 1.07 | 0.23 | -8.79                           | -7.81 |
| KC004       | -10.0 | -9.1           | -8.5  | -7.5           | -6.7 | -8.34         | 0.99 | 0.22 | -8.79                           | -7.89 |
| KC005       | -9.1  | -8.3           | -7.9  | -7.3           | -6.3 | -7.83         | 0.78 | 0.17 | -8.18                           | -7.47 |
| KC006       | -8.5  | -7.5           | -6.7  | -6.6           | -5.3 | -6.94         | 0.80 | 0.17 | -7.31                           | -6.58 |
| KC007       | -9.9  | -8.8           | -8.2  | -7.5           | -6.6 | -8.23         | 0.90 | 0.20 | -8.64                           | -7.82 |
| KC008       | -10.0 | -8.8           | -8.2  | -7.2           | -6.5 | -8.09         | 1.00 | 0.22 | -8.54                           | -7.63 |

| Compound ID | Min   | 25% Percentile | Med  | 75% Percentile | Max  | Average Value | SD   | SEM  | 95% Confidence Interval of Mean |       |
|-------------|-------|----------------|------|----------------|------|---------------|------|------|---------------------------------|-------|
|             |       |                |      |                |      |               |      |      | Lower                           | Upper |
| KC009       | -9.4  | -8.0           | -7.5 | -7.2           | -6.5 | -7.70         | 0.79 | 0.17 | -8.06                           | -7.35 |
| KC010       | -8.6  | -8.1           | -7.4 | -6.5           | -5.7 | -7.35         | 0.86 | 0.19 | -7.74                           | -6.96 |
| KD001       | -8.5  | -7.4           | -6.5 | -6.2           | -5.1 | -6.80         | 1.01 | 0.22 | -7.27                           | -6.34 |
| KD002       | -8.3  | -7.2           | -6.5 | -6.3           | -5.1 | -6.73         | 0.88 | 0.19 | -7.13                           | -6.33 |
| KE001       | -9.7  | -8.0           | -7.6 | -7.1           | -6.1 | -7.53         | 0.90 | 0.20 | -7.94                           | -7.13 |
| KE002       | -9.3  | -8.6           | -7.8 | -7.6           | -6.0 | -8.00         | 0.80 | 0.18 | -8.37                           | -7.63 |
| KE003       | -10.7 | -8.5           | -7.6 | -7.3           | -6.3 | -7.89         | 1.05 | 0.23 | -8.37                           | -7.41 |
| KE004       | -10.6 | -9.0           | -8.2 | -7.7           | -6.8 | -8.39         | 1.04 | 0.23 | -8.86                           | -7.91 |
| KE005       | -9.8  | -8.8           | -8.3 | -7.3           | -6.8 | -8.20         | 0.91 | 0.20 | -8.61                           | -7.79 |
| KE006       | -10.3 | -8.4           | -7.6 | -7.1           | -6.2 | -7.78         | 1.03 | 0.23 | -8.25                           | -7.31 |
| KE007       | -10.9 | -9.0           | -8.3 | -8.1           | -6.9 | -8.60         | 0.94 | 0.20 | -9.03                           | -8.18 |
| KE008       | -11.4 | -9.2           | -8.5 | -7.9           | -6.7 | -8.61         | 1.14 | 0.25 | -9.13                           | -8.10 |
| KE009       | -10.0 | -8.9           | -8.3 | -7.8           | -6.5 | -8.32         | 0.91 | 0.20 | -8.73                           | -7.90 |
| KE010       | -10.8 | -9.5           | -8.1 | -7.7           | -6.4 | -8.36         | 1.25 | 0.27 | -8.93                           | -7.79 |
| KE011       | -10.3 | -8.8           | -7.8 | -7.4           | -6.2 | -8.03         | 1.08 | 0.24 | -8.52                           | -7.54 |
| KE012       | -10.8 | -9.3           | -8.2 | -7.7           | -7.0 | -8.53         | 1.04 | 0.23 | -9.00                           | -8.05 |
| KF001       | -6.4  | -6.0           | -5.7 | -5.2           | -4.6 | -5.61         | 0.50 | 0.11 | -5.84                           | -5.38 |
| KF002       | -6.9  | -6.5           | -6.0 | -5.6           | -4.7 | -5.97         | 0.62 | 0.13 | -6.25                           | -5.69 |
| KF003       | -6.4  | -5.8           | -5.5 | -5.2           | -4.5 | -5.49         | 0.48 | 0.10 | -5.71                           | -5.27 |
| KF004       | -7.2  | -6.3           | -6.0 | -5.7           | -5.1 | -6.04         | 0.59 | 0.13 | -6.31                           | -5.77 |
| KF005       | -7.2  | -6.5           | -6.2 | -5.8           | -5.2 | -6.17         | 0.55 | 0.12 | -6.42                           | -5.92 |
| KF006       | -7.0  | -6.3           | -6.1 | -5.9           | -5.2 | -6.06         | 0.44 | 0.10 | -6.26                           | -5.86 |
| KF007       | -8.3  | -7.5           | -7.0 | -6.5           | -6.1 | -7.11         | 0.71 | 0.16 | -7.43                           | -6.79 |
| KG001       | -9.8  | -8.4           | -7.9 | -7.5           | -6.6 | -7.97         | 0.77 | 0.17 | -8.32                           | -7.62 |
| KH001       | -6.4  | -5.5           | -5.2 | -4.5           | -3.8 | -5.00         | 0.79 | 0.17 | -5.36                           | -4.64 |
| KI001       | -7.2  | -6.7           | -6.2 | -5.8           | -4.9 | -6.18         | 0.69 | 0.15 | -6.49                           | -5.86 |
| KJ001       | -8.4  | -7.2           | -6.5 | -5.8           | -5.4 | -6.59         | 0.90 | 0.20 | -7.00                           | -6.18 |
| ZA01        | -10.6 | -8.5           | -8.1 | -7.4           | -6.9 | -8.17         | 0.95 | 0.21 | -8.60                           | -7.74 |
| ZA02        | -10.4 | -8.9           | -8.3 | -7.7           | -7.2 | -8.37         | 0.94 | 0.21 | -8.80                           | -7.94 |
| ZA03        | -10.7 | -8.9           | -8.4 | -7.6           | -6.7 | -8.38         | 0.98 | 0.21 | -8.82                           | -7.93 |
| ZA04        | -10.7 | -9.2           | -8.3 | -7.6           | -7.2 | -8.52         | 1.10 | 0.24 | -9.02                           | -8.02 |

| Compound ID | Min   | 25% Percentile | Med  | 75% Percentile | Max  | Average Value | SD   | SEM  | 95% Confidence Interval of Mean |       |
|-------------|-------|----------------|------|----------------|------|---------------|------|------|---------------------------------|-------|
|             |       |                |      |                |      |               |      |      | Lower                           | Upper |
| ZA05        | -10.2 | -9.2           | -8.3 | -7.5           | -6.6 | -8.30         | 1.00 | 0.22 | -8.76                           | -7.84 |
| ZA06        | -10.6 | -9.2           | -8.4 | -7.6           | -7.2 | -8.39         | 0.94 | 0.20 | -8.82                           | -7.96 |
| ZA07        | -10.1 | -8.6           | -8.1 | -7.6           | -6.5 | -8.20         | 0.97 | 0.21 | -8.64                           | -7.76 |
| ZA08        | -11.0 | -10.5          | -9.0 | -8.0           | -7.1 | -9.12         | 1.30 | 0.28 | -9.72                           | -8.53 |
| ZA09        | -10.5 | -9.6           | -9.0 | -8.0           | -7.3 | -8.79         | 0.99 | 0.22 | -9.24                           | -8.33 |
| ZA11        | -9.7  | -8.8           | -8.2 | -7.4           | -6.5 | -8.17         | 0.93 | 0.20 | -8.59                           | -7.74 |
| ZA12        | -10.5 | -9.2           | -8.6 | -7.8           | -7.4 | -8.67         | 1.00 | 0.22 | -9.12                           | -8.21 |
| ZA13        | -10.1 | -8.7           | -7.9 | -7.5           | -6.4 | -8.09         | 1.02 | 0.22 | -8.55                           | -7.63 |
| ZA14        | -9.9  | -8.6           | -8.4 | -7.6           | -7.2 | -8.34         | 0.74 | 0.16 | -8.67                           | -8.00 |
| ZA15        | -9.7  | -8.9           | -8.1 | -7.5           | -6.9 | -8.21         | 0.82 | 0.18 | -8.59                           | -7.84 |
| ZA16        | -11.2 | -9.3           | -8.4 | -7.8           | -6.7 | -8.61         | 1.11 | 0.24 | -9.12                           | -8.11 |
| ZA17        | -10.7 | -9.4           | -8.8 | -7.8           | -6.9 | -8.66         | 1.07 | 0.23 | -9.14                           | -8.17 |
| ZA19        | -10.3 | -9.2           | -8.6 | -7.5           | -6.4 | -8.50         | 1.23 | 0.27 | -9.06                           | -7.94 |
| ZA20        | -10.2 | -8.7           | -7.7 | -7.2           | -6.5 | -8.07         | 1.13 | 0.25 | -8.58                           | -7.55 |
| ZA21        | -9.2  | -8.4           | -8.0 | -7.6           | -6.4 | -7.90         | 0.71 | 0.15 | -8.23                           | -7.58 |
| ZA22        | -11.0 | -9.2           | -8.6 | -7.9           | -7.2 | -8.67         | 0.94 | 0.20 | -9.09                           | -8.24 |
| ZA23        | -9.4  | -8.7           | -8.2 | -7.8           | -6.9 | -8.19         | 0.69 | 0.15 | -8.51                           | -7.88 |
| ZA24        | -10.2 | -9.0           | -8.6 | -7.7           | -7.3 | -8.43         | 0.87 | 0.19 | -8.83                           | -8.04 |
| ZA25        | -11.1 | -9.2           | -8.3 | -8.0           | -7.2 | -8.66         | 1.22 | 0.27 | -9.22                           | -8.11 |
| ZA26        | -10.8 | -9.3           | -8.6 | -7.6           | -7.2 | -8.59         | 1.04 | 0.23 | -9.06                           | -8.11 |
| ZB01        | -8.5  | -6.7           | -6.1 | -5.7           | -4.8 | -6.25         | 0.93 | 0.20 | -6.67                           | -5.82 |
| ZB02        | -9.4  | -7.6           | -7.1 | -6.5           | -5.4 | -7.03         | 0.97 | 0.21 | -7.47                           | -6.59 |
| ZB03        | -6.4  | -5.7           | -5.0 | -4.5           | -4.1 | -5.10         | 0.73 | 0.16 | -5.44                           | -4.77 |
| ZB04        | -6.3  | -5.5           | -5.0 | -4.6           | -3.7 | -5.01         | 0.78 | 0.17 | -5.37                           | -4.65 |
| ZB05        | -6.3  | -5.2           | -4.8 | -4.4           | -3.9 | -4.88         | 0.60 | 0.13 | -5.15                           | -4.60 |
| ZB06        | -6.3  | -5.4           | -5.1 | -5.0           | -3.9 | -5.21         | 0.62 | 0.13 | -5.50                           | -4.93 |
| ZB07        | -6.2  | -5.4           | -4.7 | -4.5           | -3.7 | -4.90         | 0.71 | 0.15 | -5.22                           | -4.57 |
| ZB08        | -10.3 | -8.2           | -7.5 | -7.0           | -5.8 | -7.71         | 1.18 | 0.26 | -8.25                           | -7.17 |
| ZB09        | -6.3  | -5.6           | -5.0 | -4.6           | -3.7 | -5.03         | 0.69 | 0.15 | -5.35                           | -4.72 |
| ZB10        | -10.1 | -8.4           | -7.8 | -6.6           | -5.8 | -7.73         | 1.30 | 0.28 | -8.32                           | -7.14 |
| ZB11        | -7.0  | -5.9           | -5.5 | -4.7           | -4.2 | -5.42         | 0.82 | 0.18 | -5.79                           | -5.05 |

| Compound ID | Min   | 25% Percentile | Med  | 75% Percentile | Max  | Average Value | SD   | SEM  | 95% Confidence Interval of Mean |       |
|-------------|-------|----------------|------|----------------|------|---------------|------|------|---------------------------------|-------|
|             |       |                |      |                |      |               |      |      | Lower                           | Upper |
| ZB12        | -6.1  | -5.4           | -4.9 | -4.2           | -3.6 | -4.85         | 0.68 | 0.15 | -5.16                           | -4.54 |
| ZB13        | -6.4  | -5.6           | -5.1 | -4.4           | -3.6 | -4.98         | 0.81 | 0.18 | -5.35                           | -4.61 |
| ZB14        | -6.5  | -5.7           | -5.2 | -4.6           | -3.9 | -5.17         | 0.70 | 0.15 | -5.49                           | -4.85 |
| ZB15        | -6.9  | -5.7           | -5.2 | -5.0           | -3.4 | -5.15         | 0.82 | 0.18 | -5.52                           | -4.78 |
| ZB16        | -8.5  | -6.7           | -6.2 | -5.3           | -4.8 | -6.09         | 0.92 | 0.20 | -6.50                           | -5.67 |
| ZB17        | -7.6  | -5.9           | -5.4 | -4.8           | -4.2 | -5.46         | 0.89 | 0.19 | -5.87                           | -5.06 |
| ZB18        | -6.3  | -5.7           | -4.9 | -4.4           | -3.9 | -5.01         | 0.72 | 0.16 | -5.34                           | -4.68 |
| ZB19        | -6.2  | -5.3           | -4.9 | -4.5           | -3.5 | -4.90         | 0.73 | 0.16 | -5.23                           | -4.57 |
| ZB20        | -9.6  | -7.8           | -7.3 | -6.1           | -5.5 | -7.21         | 1.12 | 0.25 | -7.72                           | -6.70 |
| ZB21        | -10.3 | -8.3           | -7.9 | -7.0           | -6.1 | -7.82         | 1.07 | 0.23 | -8.31                           | -7.34 |
| ZB22        | -6.4  | -5.5           | -5.2 | -4.7           | -4.3 | -5.20         | 0.59 | 0.13 | -5.47                           | -4.93 |
| ZB23        | -6.7  | -6.0           | -5.5 | -4.9           | -3.9 | -5.48         | 0.74 | 0.16 | -5.81                           | -5.14 |
| ZB24        | -6.1  | -5.2           | -4.9 | -4.6           | -3.8 | -4.92         | 0.66 | 0.14 | -5.22                           | -4.62 |
| ZB25        | -9.9  | -8.6           | -7.3 | -6.5           | -5.7 | -7.48         | 1.22 | 0.27 | -8.04                           | -6.92 |
| ZB26        | -10.0 | -9.0           | -8.1 | -6.8           | -6.0 | -8.00         | 1.26 | 0.27 | -8.57                           | -7.42 |
| ZB27        | -13.3 | -8.5           | -7.8 | -6.8           | -6.4 | -8.04         | 1.56 | 0.34 | -8.75                           | -7.33 |
| ZB28        | -9.3  | -8.2           | -7.3 | -6.6           | -5.7 | -7.42         | 1.04 | 0.23 | -7.90                           | -6.95 |
| ZC01        | -9.2  | -8.1           | -7.5 | -6.4           | -5.7 | -7.28         | 1.01 | 0.22 | -7.74                           | -6.82 |
| ZC02        | -8.8  | -8.2           | -7.4 | -6.2           | -5.5 | -7.18         | 1.00 | 0.22 | -7.63                           | -6.73 |
| ZC03        | -9.3  | -8.2           | -7.1 | -6.4           | -5.8 | -7.23         | 0.93 | 0.20 | -7.65                           | -6.81 |
| ZC04.       | -9.2  | -7.9           | -7.4 | -6.6           | -6.0 | -7.37         | 0.90 | 0.20 | -7.78                           | -6.96 |
| ZC04        | -10.0 | -7.9           | -7.4 | -6.6           | -6.0 | -7.42         | 1.06 | 0.23 | -7.90                           | -6.94 |
| ZC05        | -10.6 | -8.3           | -7.7 | -6.4           | -6.0 | -7.60         | 1.22 | 0.27 | -8.16                           | -7.04 |
| ZC06        | -8.8  | -8.1           | -7.3 | -6.7           | -5.5 | -7.31         | 0.95 | 0.21 | -7.75                           | -6.88 |
| ZC07        | -10.0 | -8.5           | -7.5 | -6.8           | -5.7 | -7.68         | 1.20 | 0.26 | -8.22                           | -7.13 |
| ZC08        | -8.9  | -7.3           | -6.9 | -6.3           | -5.3 | -6.86         | 0.93 | 0.20 | -7.28                           | -6.43 |
| ZC09        | -8.4  | -7.5           | -7.2 | -6.4           | -5.3 | -6.98         | 0.86 | 0.19 | -7.37                           | -6.59 |
| ZC10        | -10.3 | -8.4           | -7.8 | -6.8           | -5.8 | -7.72         | 1.24 | 0.27 | -8.29                           | -7.16 |
| ZC11        | -9.5  | -8.1           | -7.6 | -7.0           | -5.6 | -7.55         | 0.97 | 0.21 | -7.99                           | -7.11 |
| ZC12        | -12.1 | -9.6           | -9.2 | -8.3           | -7.2 | -9.22         | 1.50 | 0.33 | -9.91                           | -8.54 |
| ZC13        | -10.2 | -8.2           | -7.6 | -6.6           | -5.8 | -7.62         | 1.29 | 0.28 | -8.21                           | -7.04 |

| Compound ID | Min   | 25% Percentile | Med  | 75% Percentile | Max  | Average Value | SD   | SEM  | 95% Confidence Interval of Mean |       |
|-------------|-------|----------------|------|----------------|------|---------------|------|------|---------------------------------|-------|
|             |       |                |      |                |      |               |      |      | Lower                           | Upper |
| ZD01        | -8.1  | -6.7           | -6.3 | -5.8           | -5.0 | -6.39         | 0.77 | 0.17 | -6.74                           | -6.04 |
| ZD02        | -7.3  | -6.2           | -5.8 | -5.5           | -4.6 | -5.87         | 0.70 | 0.15 | -6.19                           | -5.55 |
| ZE01        | -9.9  | -8.2           | -7.2 | -6.7           | -5.3 | -7.51         | 1.22 | 0.27 | -8.07                           | -6.96 |
| ZE02        | -10.4 | -8.6           | -8.0 | -7.2           | -6.4 | -7.99         | 0.91 | 0.20 | -8.40                           | -7.57 |
| ZF01        | -4.4  | -3.9           | -3.5 | -3.4           | -3.0 | -3.61         | 0.34 | 0.07 | -3.76                           | -3.46 |
| ZF02        | -5.5  | -4.9           | -4.6 | -4.4           | -4.2 | -4.71         | 0.42 | 0.09 | -4.90                           | -4.52 |
| ZF03        | -5.0  | -4.5           | -4.3 | -4.0           | -3.4 | -4.25         | 0.41 | 0.09 | -4.43                           | -4.06 |
| ZF04        | -6.7  | -6.3           | -5.9 | -5.3           | -4.6 | -5.82         | 0.59 | 0.13 | -6.09                           | -5.55 |
| ZF05        | -5.9  | -5.2           | -5.1 | -4.6           | -4.3 | -5.05         | 0.46 | 0.10 | -5.26                           | -4.84 |
| ZF06        | -5.2  | -4.7           | -4.5 | -4.1           | -3.7 | -4.43         | 0.45 | 0.10 | -4.63                           | -4.22 |
| ZF07        | -4.7  | -4.3           | -4.0 | -3.8           | -3.3 | -4.01         | 0.34 | 0.07 | -4.16                           | -3.85 |
| ZF08        | -5.3  | -4.9           | -4.7 | -4.4           | -3.8 | -4.67         | 0.39 | 0.08 | -4.84                           | -4.49 |
| ZF09        | -8.0  | -6.9           | -6.6 | -6.1           | -5.0 | -6.47         | 0.71 | 0.16 | -6.80                           | -6.15 |
| ZF10        | -5.8  | -5.2           | -4.8 | -4.5           | -3.8 | -4.84         | 0.52 | 0.11 | -5.08                           | -4.60 |
| ZF11        | -5.3  | -5.0           | -4.5 | -4.3           | -3.9 | -4.62         | 0.39 | 0.09 | -4.80                           | -4.44 |
| ZF12        | -5.4  | -5.0           | -4.6 | -4.4           | -3.7 | -4.62         | 0.46 | 0.10 | -4.83                           | -4.41 |
| ZF13        | -5.3  | -4.9           | -4.6 | -4.2           | -4.0 | -4.58         | 0.40 | 0.09 | -4.76                           | -4.40 |
| ZF14        | -6.6  | -6.1           | -5.8 | -5.5           | -4.5 | -5.76         | 0.57 | 0.12 | -6.02                           | -5.50 |
| ZF15        | -5.4  | -4.7           | -4.3 | -4.3           | -3.9 | -4.50         | 0.39 | 0.08 | -4.67                           | -4.32 |
| ZF16        | -4.7  | -4.5           | -4.1 | -3.9           | -3.5 | -4.17         | 0.35 | 0.08 | -4.33                           | -4.01 |
| ZF17        | -5.7  | -5.1           | -4.7 | -4.5           | -4.0 | -4.82         | 0.43 | 0.09 | -5.02                           | -4.63 |
| ZF18        | -6.0  | -5.4           | -5.2 | -5.0           | -4.6 | -5.23         | 0.33 | 0.07 | -5.38                           | -5.08 |
| ZG01        | -7.5  | -6.6           | -6.2 | -5.8           | -5.1 | -6.25         | 0.65 | 0.14 | -6.55                           | -5.95 |
| ZG02        | -7.9  | -7.1           | -6.8 | -6.2           | -5.5 | -6.67         | 0.66 | 0.14 | -6.97                           | -6.37 |
| ZG03        | -8.0  | -7.2           | -6.6 | -5.8           | -5.3 | -6.51         | 0.79 | 0.17 | -6.87                           | -6.15 |
| ZG04        | -7.5  | -6.8           | -6.2 | -5.8           | -5.2 | -6.29         | 0.62 | 0.14 | -6.57                           | -6.00 |
| ZG05        | -7.6  | -6.5           | -6.1 | -5.7           | -5.0 | -6.18         | 0.75 | 0.16 | -6.52                           | -5.84 |
| ZG06        | -8.2  | -7.3           | -6.6 | -6.1           | -5.4 | -6.75         | 0.77 | 0.17 | -7.10                           | -6.40 |
| ZH01        | -5.7  | -5.3           | -5.2 | -4.7           | -4.4 | -5.07         | 0.37 | 0.08 | -5.24                           | -4.90 |
| ZH02        | -6.2  | -5.4           | -5.2 | -4.9           | -4.4 | -5.16         | 0.43 | 0.09 | -5.36                           | -4.97 |
| ZH03        | -5.4  | -5.0           | -4.7 | -4.4           | -3.9 | -4.65         | 0.38 | 0.08 | -4.82                           | -4.48 |

| Compound ID | Min  | 25%<br>Percentile | Med  | 75%<br>Percentile | Max  | Average<br>Value | SD   | SEM  | 95% Confidence<br>Interval of Mean |       |
|-------------|------|-------------------|------|-------------------|------|------------------|------|------|------------------------------------|-------|
|             |      |                   |      |                   |      |                  |      |      | Lower                              | Upper |
| ZH04        | -5.9 | -5.3              | -5.1 | -4.8              | -4.2 | -5.06            | 0.41 | 0.09 | -5.24                              | -4.87 |
| ZI01        | -6.8 | -5.9              | -5.5 | -4.9              | -4.2 | -5.43            | 0.74 | 0.16 | -5.76                              | -5.09 |
| ZI02        | -6.2 | -5.6              | -5.2 | -4.7              | -3.9 | -5.13            | 0.66 | 0.14 | -5.43                              | -4.83 |
| ZI03        | -6.9 | -6.1              | -5.4 | -5.0              | -4.5 | -5.54            | 0.68 | 0.15 | -5.85                              | -5.23 |
| ZI04        | -8.9 | -8.0              | -7.7 | -6.8              | -5.8 | -7.53            | 0.85 | 0.18 | -7.91                              | -7.14 |
| ZJ01        | -8.5 | -7.4              | -6.7 | -5.9              | -4.6 | -6.68            | 1.01 | 0.22 | -7.14                              | -6.22 |
| ZJ02        | -8.2 | -7.0              | -6.6 | -6.1              | -5.2 | -6.66            | 0.76 | 0.17 | -7.00                              | -6.31 |
| ZJ03        | -8.2 | -7.4              | -6.4 | -5.9              | -5.4 | -6.63            | 0.82 | 0.18 | -7.01                              | -6.26 |

Note: Ave: Average value; Max: Maximum; Med: Median value; Min: Minimum; SD: Standard deviation; SEM: Standard error of mean. Corresponding compound names refer to Supplementary Table S1 online.

## References

- Cai, W., Xiong, Y., Sheng, Z., Xia, M., & Cui, M. (2013). Determination of eighteen trace elements in *Fritillaria* from different places by ICP-OES. *Chinese Journal of Modern Applied Pharmacy*, 30(3), 277-280.
- Cao, Y., Zhu, X., & Tan, L. (2012). Analysis of chemical composition by GC/MS and antimicrobial activities of essential oil from *Fritillaria thunbergii* Miq. *Journal of Zhejiang Sci-Tech University*, 29(1), 129-132.
- Chen, J. (2017). Determination of trace elements in *Angelica sinensis* and its processed products. *For all Health*, 11(25), 42-43.
- Chen, J., Yang, X., Tang, F., & Wei, Y. (2017). Ultrasonic extraction of matrine and oxymatrine from *Sophora Flavescens*. *Guangdong Chemical Industry*, 44(343), 62-63. <https://doi.org/10.3969/j.issn.1007-1865.2017.05.028>
- Chen, X., Li, X., Mao, X., Huang, H., Miao, J., & Gao, W. (2016). Study on the effects of different drying methods on physicochemical properties, structure, and in vitro digestibility of *Fritillaria thunbergii* Miq. (Zhebeimu) flours. *Food and Bioproducts Processing*, 98, 266-274. <https://doi.org/10.1016/j.fbp.2016.01.008>
- Chen, Y., & Wang, S. (2012).  $\beta$ -D-glu 4-1 $\beta$ -D-gal and sucrose determination of different *Fritillarias* by HPLC-ELSD. *Lishizhen Medicine and Materia Medica Research*, 23(7), 1605-1606.
- Chen, Y., Yang, H., Xu, H., Ma, H., He, L., Zhao, X., Gu, F., Gao, Y., & Shan, J. (2018). Isolation, physicochemical properties and immunomodulating effects of polysaccharides from *Sophora Flavescens* Radix. *Journal of International Pharmaceutical Research*, 45(8), 611-618. <https://doi.org/10.13220/j.cnki.jipr.2018.08.009>
- Cheng, X., Xiao, X., Zhang, N., & Ma, S. (2008). Determination the contents of peimine and peiminine in Thumberg Fritillary Bulb by HPLC-MS. *China Pharmacist*, 11(7), 770-772.
- Cui, M., Zhang, J., Chen, S., Jiang, H., Zhou, H., & Ling, Q. (2016). Identification of alkaloids and flavonoids in all parts of *Fritillaria thunbergii* using LC-LTQ-Qorbitrap MS<sup>n</sup>. *Zhongguo Zhong Yao Za Zhi*, 41(11), 2124-2130.
- Cui, Q., Li, Y., & Liu, X. (2017). Measurement and health risk assessment of microelement of *Angelica sinensis*. *Bulletin of Disease Control & Prevention (China)*, 32(4), 65-67. <https://doi.org/10.13215/j.cnki.jbyfkztb.1703009>
- Ding, Q. (2016). The study on the correlation of the microstructure and chemical composition of Radix *Salviae miltiorrhizae*, Radix *Stellariae* and Radix *Angelicae Sinensis* [Master's thesis, Guangzhou University of Chinese Medicine]. China National Knowledge Infrastructure.
- Du, W., Zhang, H., Yue, X., Zhu, T., & Ge, W. (2018). The analysis on volatile components of Zhejiang Fritillary slices with different primary processing methods. *Lishizhen Medicine and Materia Medica Research*, 29(1), 73-76.
- Duan, B., Huang, L., & Chen, S. (2012). Study on the destructive effect to inherent quality of *Fritillaria thunbergii* Miq. (Zhebeimu) by sulfur-fumigated process using chromatographic fingerprinting analysis. *Phytomedicine*, 19(6), 562-568. <https://doi.org/10.1016/j.phymed.2011.12.010>
- Filipiak-Szok, A., Kurzawa, M., & Szyk, E. (2016). Simultaneous determination of selected anti-nutritional components in Asiatic plants using ion chromatography. *European Food Research and Technology*, 242(9), 1515-1521. <https://doi.org/10.1007/s00217-016-2652-x>
- Gao, C. (2016). Determination of components in *Angelica sinensis* and its preparations. *World Latest Medicine Information*, 3(16), 207-208. <https://doi.org/10.3969/j.issn.1671-3141.2016.3.154>
- Gong, W., Zhou, Y., Li, X., Gao, X., Tian, J., Qin, X., & Du, G. (2016). Neuroprotective and cytotoxic phthalides from *Angelicae Sinensis* Radix. *Molecules*, 21(5), 549-549. <https://doi.org/10.3390/molecules21050549>
- Guan, X., Mao, J., Yan, B., Wang, D., Zhang, X., & Zhou, H. (2018). A comparative study among ferulic acid, caffeic acid content and antioxidant in different extracts of *Angelica sinensis*. *Natural Product Research and Development*, 12(30), 2033-2038. <https://doi.org/10.16333/j.1001-6880.2018.12.001>
- Guan, Z., Wu, S., Guo, B., Wei, H., Wang, Y., & Yang, X. (2015). Comparative study on active

- ingredient content in different parts of *Sophora flavescens*. *Modern Chinese Medicine*, 17(12), 1272-1274. <https://doi.org/10.13313/j.issn.1673-4890.2015.12.010>
- Guo, J. (2007). *Comparative research on the pharmaceutic and pharmacodynamics among different breed Bulbus Fritillaria Thunbergii* [Master's thesis, Heilongjiang University of Chinese Medicine]. China National Knowledge Infrastructure.
- Hao, W., Li, D., & Yang, C. (2017). Determination of matrine and oxymatrine in *Sophora Flavescens* by reverse phase liquid chromatography. *Chemical Analysis and Meterage*, 26(4), 68-70. <https://doi.org/10.3969/j.issn.1008-6145.2017.04.017>
- He, X., Fang, J., Huang, L., Wang, J., & Huang, X. (2015). *Sophora flavescens* Ait.: Traditional usage, phytochemistry and pharmacology of an important traditional Chinese medicine. *Journal of Ethnopharmacology*, 172(2015), 10-29. <https://doi.org/10.1016/j.jep.2015.06.010>
- Huang, C. (2016). Determination of the contents of peimine A and peimine B in *Fritillaria thunbergii* by ELSD *China Health Standard Management*, 7(18), 139-141.
- Huang, Q., Xu, L., Wen-Shan, Q., Zhao-Hong, Y., Wen-Yu, H., Long-Yuan, L., Jin-Feng, L., Shao, L., & Hong-Yan, M. (2017). TLC bioautography-guided isolation of antioxidant activity components of extracts from *Sophora flavescens* Ait. *European Food Research and Technology*, 243(7), 1127-1136. <https://doi.org/10.1007/s00217-016-2820-z>
- Huang, R. (2017). Determination of active compounds from different medical parts of *Angelica sinensis*. *Nei Mongol Journal of Traditional Chinese Medicine*, 18(36), 117-118. <https://doi.org/10.3969/j.issn.1006-0979.2017.18.117>
- Huang, R., Liu, Y., Zhao, L. L., Chen, X. X., Wang, F., Cai, W., & Chen, L. (2017). A new flavonoid from *Sophora flavescens* Ait. *Natural Product Research*, 31(19), 2228-2232. <https://doi.org/10.1080/14786419.2017.1297992>
- Ji, M., Zeng, K., & Wang, H. (2017). Simultaneous determination of seven alkaloid constituents in *Sophora Flavescens*. *China Pharmacist*, 20(1), 60-63. <https://doi.org/10.3969/j.issn.1008-049X.2017.01.016>
- Jiang, H., Zhao, X., & Lin, W. (2019). Qualitative analysis of multiple coumarins in *Angelicae Sinensis Radix* based on HPLC-Q-TOF-MS/MS. *Chinese Journal of Experimental Traditional Medical Formulae*, 25(13), 157-162. <https://doi.org/10.13422/j.cnki.syfjx.20190918>
- Jin, X., Xu, D., Xu, Y., Cui, D., Xiao, X., Tian, Z., Lu, Y., & Zhen, Q. (1993). The structure identification of zhepinesionol. *Acta Pharmacologica Sinica*, 28(3), 212-215.
- Kim, E. J., Yoon, Y. P., Woo, K. W., Kim, J. H., Min, S. Y., Lee, H. J., Lee, S. K., Hong, J. H., Lee, K. R., & Lee, C. J. (2016). Verticine, ebeiedine and suchengbeisine isolated from the bulbs of *Fritillaria thunbergii* Miq. inhibited the gene expression and production of MUC5AC mucin from human airway epithelial cells. *Phytomedicine*, 23(2), 95-104. <https://doi.org/10.1016/j.phymed.2015.12.016>
- Kim, J. H., Cho, C. W., Kim, H. Y., Kim, K. T., Choi, G. S., Kim, H. H., Cho, I. S., Kwon, S. J., Choi, S. K., Yoon, J. Y., Yang, S. Y., Kang, J. S., & Kim, Y. H. (2017).  $\alpha$ -Glucosidase inhibition by prenylated and lavandulyl compounds from *Sophora flavescens* roots and in silico analysis [Article]. *International Journal of Biological Macromolecules*, 102, 960-969. <https://doi.org/10.1016/j.ijbiomac.2017.04.092>
- Kim, J. H., Cho, I. S., So, Y. K., Kim, H. H., & Kim, Y. H. (2018). Kushenol A and 8-prenylkaempferol, tyrosinase inhibitors, derived from *Sophora flavescens* [Article]. *Journal of Enzyme Inhibition and Medicinal Chemistry*, 33(1), 1048-1054. <https://doi.org/10.1080/14756366.2018.1477776>
- Kitajima, J., Komori, T., & Kawasaki, T. (1982). Studies on the constituents of the crude drug "Fritillariae bulbus." III. On the diterpenoid constituents of fresh bulbs of *Fritillaria thunbergii* Miq. *Chemical and Pharmaceutical Bulletin*, 30(11), 3912-3921. <https://doi.org/10.1248/cpb.30.3912>
- Kitajima, J., Noda, N., Ida, Y., Komori, T., & Kawasaki, T. (1982). Studies on the constituents of the crude drug "Fritillariae bulbus." IV. On the diterpenoid constituents of the crudr "Fritillariae bulbus". *Chemical and Pharmaceutical Bulletin*, 30(11), 3922-3931. <https://doi.org/10.1248/cpb.30.3922>



- Lee, J., Jung, J., Son, S. H., Kim, H. B., Noh, Y. H., Min, S. R., Park, K. H., Kim, D. S., Park, S. U., Lee, H. S., Kim, C. Y., Kim, H. S., Lee, H. K., & Kim, H. (2018). Profiling of the major phenolic compounds and their biosynthesis genes in *Sophora flavescens* Aiton. *Scientific World Journal*, 2018, e6218430, Article 6218430. <https://doi.org/10.1155/2018/6218430>
- Li, J., Wei, Y., Qin, X., & Li, Z. (2017). Chemical comparison on different parts of *Angelica sinensis* Radix based on NMR metabolomics. *Chinese Traditional and Herbal Drugs*, 48(7), 1409-1415. <https://doi.org/10.7501/j.issn.0253-2670.2017.07.025>
- Li, X., Dong, X., Bao, B., Hang, L., Liu, B., & Zhang, P. (2019). Rapid analysis and identification of chemical components of *Sophora Flavescens* based on Q-exactive high resolution mass spectrometry. *Journal of Chinese Medicinal Materials*, 42(1), 103-109. <https://doi.org/10.13863/j.issn1001-4454.2019.01.023>
- Li, Z., Gu, H., Kang, L., Zhang, Y., & Song, h. (2016). Identification of key aroma-active compounds in *Radix Angelica sinensis* and study on its variation during boiling process. *Science and Technology of Food Industry*, 37(9), 311-316. <https://doi.org/10.13386/j.issn.1002-0306.2016.09.052>
- Liu, J., Wang, X., Xiang, Z., & Li, Y. (2008). Study on the principal component analysis method to determination of trace elements of *Fritillaria thunbergii* Miq. *Guangdong Trace Elements Science*, 15(12), 31-35.
- Liu, L., Yang, J., & Hong, J. (2018). Determination and evaluation of heavy metals in *Radix Sophora flavescens* Ait. in different origins. *Guangdong Chemical Industry*, 20(45), 34-36. <https://doi.org/10.3969/j.issn.1007-1865.2018.20.016>
- Liu, L., Yue, M., Li, W., Peng, C., & Xiong, L. (2016). Differences from chemical components and protective effect on acute cerebral injury of mice between the oils from *Angelica sinensis* and *Ligusticum Chuanxiong*. *Pharmacology and Clinics of Chinese Materia Medica*, 32(6), 105-108. <https://doi.org/10.13412/j.cnki.zyyl.2016.06.029>
- Liu, Q. (2018). Study on the structure identification of lactones in *Angelica sinensis*. *For all Health*, 6(12), 118-119. [https://doi.org/10.3969/j.issn.1009-6019\(z\).2018.06.135](https://doi.org/10.3969/j.issn.1009-6019(z).2018.06.135)
- Lou, Y., Cai, H., Liu, X., Tu, S., Pei, K., Zhao, Y., Cao, G., Li, S., Qin, K., & Cai, B. (2014). Element analysis and characteristic identification of non-fumigated and sulfur-fumigated *Fritillaria thunbergii* Miq. using microwave digestion-inductively coupled plasma atomic emission spectrometry combined with Fourier transform infrared spectrometry. *Pharmacognosy Magazine*, 10(Suppl 1), S30-36. <https://doi.org/10.4103/0973-1296.127337>
- Luo, L., Ma, L., Liu, S., & Zhu, M. (2017). Determination of the 1-(3',4'-Dihydroxycinnamoyl)-cyclopentane-2,3-diol in *Angelicae Sinensis Radix* by HPLC. *Chinese Journal of Modern Applied Pharmacy*, 34(9), 1296-1299. <https://doi.org/10.13748/j.cnki.issn1007-7693.2017.09.017>
- Ma, J., Wei, W., Guo, T., Li, S., Wang, Y., & Jin, L. (2016). Study on chemical constituents of n-butanol extracts from *Angelica sinensis*. *China Food*, 2016(3), 62-64. <https://doi.org/10.3969/j.issn.1006-6195.2016.03.032>
- Ma, J. Y., Zhao, D. R., Yang, T., Liu, D., Li, R. T., & Li, H. M. (2019). Prenylflavanones isolated from *Sophora flavescens*. *Phytochemistry Letters*, 29, 138-141. <https://doi.org/10.1016/j.phytol.2018.11.025>
- Ma, W., Rong, J., Sheng, Z., & Hu, J. (2008). Study on HPLC specific chromatogram of *Fritillaria thunbergii*. *Chinese Journal of Hospital Pharmacy*, 28(17), 1458-1460.
- Ma, Y., Wen, Q., Tong, X., Fan, B., & Sun, J. (2014). Study on serum pharmacology of *Fritillaria thunbergii* Miq. by LC-MS in rats. *Chinese Journal of Pharmacovigilance*, 11(12), 714-720.
- Ma, Y., Xu, S., Liao, H., He, F., Zhong, F., Wen, W., & Wu, D. (2017). HPLC simultaneous determination of seven components in SFE-CO<sub>2</sub> extract from *Chuanxiong Rhizoma* and *Angelicae Sinensis Radix* and stability investigation of coniferyl ferulate. *Chinese Journal of Experimental Traditional Medical Formulae*, 23(9), 24-29. <https://doi.org/10.13422/j.cnki.syfjx.2017090024>
- Morimoto, H., & Kimata, S. (1960). Studies on the components of *Fritillaria Thunbergii* Miq. I. isolation of peimine and its new glycoside. *Chemical and Pharmaceutical Bulletin*, 8(4), 302-

307. <https://doi.org/10.1248/cpb.8.302>
- National Comprehensive Cancer Network. (2019). *NCCN clinical practice guidelines in oncology-prostate cancer (version 4)*. Retrieved 1 Jan 2020 from [https://www.nccn.org/professionals/physician\\_gls/pdf/prostate.pdf](https://www.nccn.org/professionals/physician_gls/pdf/prostate.pdf)
- Pan, Z., Wan, Z., Zeng, H., Yang, S., & Cai, W. (2017). Using solid ionic liquid at room temperature as extraction agent for the separation and determination of ferulic acid in *Angelica sinensis*. In Chinese Chemical Society (Eds.). *The 21st National Chromatography Academic Conference and Instrument Exhibition* (pp. 412-413). Chinese Chemical Society.
- Pei, J., He, Y., Yao, H., Wang, Y., Feng, X., Ge, C., & Huang, L. (2017). Analysis of the volatile constituents in different parts of *Angelica sinensis* by GC-MS and orthogonal projection resolution. *Chinese Journal of Pharmaceutical Analysis*, 37(5), 826-831. <https://doi.org/10.16155/j.0254-1793.2017.05.12>
- Qin, S., Zhao, X., Geng, L., Zhou, H., Liu, M., Li, F., & Zhao, C. (2017). Determination of 6 elements in *Angelica sinensis* by microwave digestion-AAS. *Guangzhou Chemical Industry*, 44(1), 97-98. <https://doi.org/0.3969/j.issn.1001-9677.2017.01.033>
- Qin, Z. (2017). Determination of copper in *Angelica sinensis*. *Seed Science & Technology*, 3(35), 106, 109. <https://doi.org/10.3969/j.issn.1005-2690.2017.03.075>
- Rong, Y., & Zhang, Y. (2017). Determination of four elements (copper, cadmium, mercury, arsenic) in *Angelicae Sinensis Radix* by microwave digestion with ICP-MS. *Strait Pharmaceutical Journal*, 29(1), 63-64. <https://doi.org/10.3969/j.issn.1674-7860.2017.13.021>
- Su, B. (2019). Study on effective chemical constituents in different parts of *Angelica sinensis*. *China Journal of Pharmaceutical Economics*, 1(14), 34-37. <https://doi.org/10.12010/j.issn.1673-5846.2019.01.007>
- Suh, W. S., Lee, S. Y., Park, J. E., Kim, D. H., Kim, S., & Lee, K. R. (2018). Two new steroidal alkaloids from the bulbs of *fritillaria thunbergii*. *Heterocycles*, 96(5), 921-930. <https://doi.org/10.3987/COM-18-13891>
- Sun, L., Guo, J., Yan, Y., Yu, H., Li, W., Zhang, L., & Song, X. (2017). Study on the chemical constituents and antibacterial activity of *Radix Sophora Flavescens*. *Journal of Liaoning University of Traditional Chinese Medicine*, 19(11), 49-53. <https://doi.org/10.13194/j.issn.1673-842x.2017.11.014>
- Sun, X., Li, B., Huang, W., Wang, N., Song, Z., & Tang, Z. (2019). Determination of ferulic acid from the alcohol extract of *Angelica sinensis* and the investigation of its antioxidant activity. *Shanxi journal of Agricultural Sciences*, 65(1), 30-32.
- Takahashi, T., Ishino, A., Arai, T., Hamada, C., Nakazawa, Y., Iwabuchi, T., & Tajima, M. (2016). Improvement of androgenetic alopecia with topical *Sophora flavescens* Aiton extract, and identification of the two active compounds in the extract that stimulate proliferation of human hair keratinocytes. *Clinical and Experimental Dermatology*, 41(3), 302-307. <https://doi.org/10.1111/ced.12753>
- Wang, B., Li, X., & Zhang, X. (2018). Determination of Matrine by GC and HPLC. *Agrochemicals*, 57(7), 497-499. <https://doi.org/10.16820/j.cnki.1006-0413.2018.07.008>
- Wang, C., Liu, H., Wang, X., Tong, X., & Hu, S. (2017). Determination of alkaloids in *Sophora Flavescens* by high performance capillary electrophoresis. *Chemical Engineering Design Communications*, 43(2), 115, 118. <https://doi.org/10.3969/j.issn.1003-6490.2017.02.092>
- Wang, H., Dong, Q., Wu, F., Tan, J., Li, P., Liu, J., & Lin, H. (2019). Simultaneous determination of 12 essential trace elements and 5 heavy metal elements in *Angelica Sinensis* (Oliv.) Diels by ICP-MS. *Special Wild Economic Animal and Plant Research*, 2(41), 69-73. <https://doi.org/10.16720/j.cnki.tcyj.2019.02.017>
- Wang, J., Ge, B., Li, Z., Guan, F., & Li, F. (2016). Structural analysis and immunoregulation activity comparison of five polysaccharides from *Angelica sinensis*. *Carbohydrate Polymers*, 140, 6-12. <https://doi.org/10.1016/j.carbpol.2015.12.050>
- Wang, L., Fan, S., Xu, F., Liu, G., & Shang, M. (2019). Analysis of polarity components of *Angelicae Sinensis Radix* and its metabolites in rats by HPLC-MSn. *Chinese Journal of Chinese Materia Medica*, 2019(22), 1-14. <https://doi.org/10.19540/j.cnki.cjmm.20190522.503>
- Wang, L., Huang, S., Chen, B., Zang, X.-Y., Su, D., Liang, J., Xu, F., Liu, G.-X., Shang, M.-Y., &

- Cai, S.-Q. (2016). Characterization of the anticoagulative constituents of *Angelicae Sinensis Radix* and their metabolites in rats by HPLC-DAD-ESI-IT-TOF-MSn. *Planta Medica*, 82(4), 362-370. <https://doi.org/10.1055/s-0035-1558309>
- Wang, N., Zhang, Q., Xin, H., Shou, D., & Qin, L. (2017). Osteoblast cell membrane chromatography coupled with liquid chromatography and time-of-flight mass spectrometry for screening specific active components from traditional Chinese medicines. *Journal of Separation Science*, 40(22), 4311-4319. <https://doi.org/10.1002/jssc.201700688>
- Wang, Q., Xu, J., Li, X., Zhang, D., Han, Y., & Zhang, X. (2017). Comprehensive two-dimensional PC-3 prostate cancer cell membrane chromatography for screening anti-tumor components from *Radix Sophorae flavescentis*. *Journal of Separation Science*, 40(13), 2688-2693. <https://doi.org/10.1002/jssc.201700208>
- Wang, X., Zhao, Z., Zhang, Y., Shi, X., Cheng, F., Guo, M., & Wen, X. (2018). Comparative analysis of volatile compounds in *Angelica Sinensis* by different acquisition methods with GC-MS technique. *Journal of Traditional Chinese Veterinary Medicine*, 1(37), 61-65. <https://doi.org/10.13823/j.cnki.jtcvm.2018.01.019>
- Wang, Y., Qin, L., Li, P., & Li, Y. (2016). Effect of ethanol at different concentrations on liver protection active components in *Angelica Sinensis* extracted by ultrasonic wave. *China Pharmacist*, 19(8), 1479-1482. <https://doi.org/10.3969/j.issn.1008-049X.2016.08.015>
- Wei, W. (2016). *Studies on chemical constituents from n-buOH extraction of Angelica sinensis* [Master's thesis, Lanzhou University of Technology]. China National Knowledge Infrastructure.
- Wei, W., Zeng, R., Gu, C., Qu, Y., & Huang, L. (2016). *Angelica sinensis* in China-A review of botanical profile, ethnopharmacology, phytochemistry and chemical analysis. *Journal of Ethnopharmacology*, 190(2016), 116-141. <https://doi.org/10.1016/j.jep.2016.05.023>
- Weng, Z., Zeng, F., Zhu, Z., Qian, D., Guo, S., Wang, H., & Duan, J. A. (2018). Comparative analysis of sixteen flavonoids from different parts of *Sophora flavesces Ait.* by ultra high-performance liquid chromatography-tandem mass spectrometry. *Journal of Pharmaceutical and Biomedical Analysis*, 156, 214-220. <https://doi.org/10.1016/j.jpba.2018.04.046>
- Wu, C., Wu, M., & Chen, Y. (2018). Selective extraction of n-butylidenephthalide from *Angelica sinensis* (Danggui) by using functionalized iron oxide magnetic nanoparticles as trapping probes. *Analytical Methods*, 10(14), 1593-1601. <https://doi.org/10.1039/c8ay00065d>
- Wu, D., Wang, H., & Shen, P. (1998). Determination of selenium with different valences in Zhebeimu by spectrophotometry. *Guangdong Trace Elements Science*, 5(7), 66-68.
- Wu, G., Yang, X., Deng, Y., Yang, Z., & Yang, Y. (2018). Fingerprints and component analysis of aqueous decoction from different medical parts of *Angelica sinensis*. *Chinese Traditional Patent Medicine*, 40(4), 890-894. <https://doi.org/10.3969/j.issn.1001-1528.2018.04.025>
- Wu, X., Chan, S. W., Ma, J., Li, P., Shaw, P. C., & Lin, G. (2018). Investigation of association of chemical profiles with the tracheobronchial relaxant activity of Chinese medicinal herb Beimu derived from various *Fritillaria* species. *Journal of Ethnopharmacology*, 210, 39-46. <https://doi.org/10.1016/j.jep.2017.08.027>
- Wu, X., Zhang, S., Cai, Y., & Ma, K. (2017). Study on using capillary electrophoresis to separate three alkaloids from *Sophora flavesces*. *Journal of Changzhi University*, 34(5), 497-499. <https://doi.org/10.3969/j.issn.1673-2014.2017.05.004>
- Wu, Y. (2016). Study on the separation and pharmacodynamical research of effective components for *Sophora Flavesces Ait* in Tranquilizing mind [Master's thesis, Zhejiang Chinese Medical University]. China National Knowledge Infrastructure.
- Wu, Y., Ma, M., & Nian, H. (2016). Isolation of chemical composition of *Angelica* and identification of lactone component structure. *World Journal of Integrated Traditional and Western Medicine*, 11(5), 649-652. <https://doi.org/10.13915/j.cnki.sjzx.160514>
- Wu, Z., & Zheng, S. (1997). Grey relational analysis and determination of elements in *Fritillaria Thunbergii* Bulb and *Fritillariae Cirrhosae* Bulb. *Journal of Chinese Medicinal Materials*, 20(6), 291-293.
- Xu, C. (2016). Isolation and determination of the chemical compounds from *Angelica sinensis*. *Asia-Pacific Traditional Medicine*, 12(24), 42-43. <https://doi.org/10.11954/ytctyy.201624015>

- Xue, Y., & Gu, H. (2005). Determination of peimine and peiminine in *Fritillaria thunbergii* by HPLC-ELSD. *Acta Pharmacologica Sinica*, 40(6), 550-552.
- Yang, Y., Tang, L., Yao, Q., Shang, Q., Liu, D., & Xu, X. (2016). Determination of matrine and oxymatrine in *Radix Sophorae Flavescentis* by TLC scanning. *Journal of Traditional Chinese Veterinary Medicine*, 1(35), 26-28. <https://doi.org/10.13823/j.cnki.jtcvm.2016.01.007>
- Yang, Z., Li, X., Liu, M., Zhang, W., Shan, B., Song, C., & Deng, W. z. (2016). Isolation of antibacterial activity constituents of total flavonoids from *Sophora Flavescens* and simultaneous determination of seven flavonoids by HPLC. *Chinese Pharmaceutical Journal*, 24(51), 2169-2174. <https://doi.org/10.11669/cpj.2016.24.024>
- Yu, R., Cheng, Z., & Gong, X. (2007). Determination and comparison of trace elements in four sort of *Bulbus Fritillariae* by microwave digestion-atomic absorption spectrometry. *Spectroscopy and Spectral Analysis*, 27(12), 2591-2594.
- Yuan, X., Shi, J., Yang, Y., Luan, J., Gao, J., & Wang, Y. (2010). Establishment of element fingerprint and multielement analysis of *Fritillaria thunbergii* by inductively coupled plasma optical emission spectrometry. *Biological Trace Element Research*, 135(1-3), 304-313. <https://doi.org/10.1007/s12011-010-8627-z>
- Zhang, C., Sun, L., Chen, R., Su, J. H., Zhang, H. F., Gu, B. R., Xing, Y. W., & Xue, M. (2016). Multiple analytical methods for identification and quality evaluation of *Fritillariae Thunbergii* *Bulbus* based on biological single molecules by high-performance liquid chromatography. *Journal of Separation Science*, 39(18), 3536-3543. <https://doi.org/10.1002/jssc.201600356>
- Zhang, J., Lao, A., Huang, H., Ma, G., & Xu, R. (1992). Studies on chemical constituents of *Fritillaria thunbergii* Miq. III. isolation and identification of Zhebeinone. *Acta Pharmacologica Sinica*, 27(6), 472-475.
- Zhang, J., Lao, A., Ma, G., & Xu, R. (1991). Studies on chemical constituents of *Fritillaria thunbergii* Miq. II. *Acta Pharmacologica Sinica*, 33(12), 923-926.
- Zhang, J., Lao, A., & Xu, R. (1993a). Studies on chemical constituents of *Fritillaria thunbergii* Miq. IV. *Chinese Bulletin of Botany*, 35(3), 238-241.
- Zhang, J., Lao, A., & Xu, R. (1993b). Studies on the chemical constituents of fresh bulbs of *Fritillaria thunbergii* Miq. *China Journal of Chinese Materia Medica*, 18(6), 354-355.
- Zhang, Q., Yu, J., Wang, Y., & Su, W. (2016). Selective Extraction of Flavonoids from *Sophora flavescens* Ait. by Mechanochemistry. *Molecules*, 21(8), 989-989. <https://doi.org/10.3390/molecules21080989>
- Zhang, Q., Yu, J., Zhang, L., Hu, M., Xu, Y., & Su, W. (2016). Extraction, characterization, and biological activity of polysaccharides from *Sophora flavescens* Ait. *International Journal of Biological Macromolecules*, 93, 459-467. <https://doi.org/10.1016/j.ijbiomac.2016.08.052>
- Zhang, R., Hu, S., Chen, X., & Bai, X. (2016). Dispersive liquid-liquid microextraction combined with high-performance liquid chromatography for the simultaneous analysis of matrine alkaloids in traditional Chinese medicine. *Journal of Chromatographic Science*, 54(9), 1687-1693. <https://doi.org/10.1093/chromsci/bmw114>
- Zhang, W., Zhu, D., Fan, H., Liu, X., Wan, Q., Wu, X., Liu, P., & Tang, J. Z. (2015). Simultaneous extraction and purification of alkaloids from *Sophora flavescens* Ait. by microwave-assisted aqueous two-phase extraction with ethanol/ammonia sulfate system. *Separation and Purification Technology*, 141, 113-123. <https://doi.org/10.1016/j.seppur.2014.11.014>
- Zhang, Y. B., Zhan, L. Q., Li, G. Q., Wang, F., Wang, Y., Li, Y. L., Ye, W. C., & Wang, G. C. (2016). Dimeric matrine-type alkaloids from the roots of *Sophora flavescens* and their anti-hepatitis B virus activities. *Journal of Organic Chemistry*, 81(15), 6273-6280. <https://doi.org/10.1021/acs.joc.6b00804>
- Zhao, D., Xue, Y., Chen, X., Liu, D., Li, R., & Li, H. (2018). A study on the quinolizidine alkaloids of *Sophora flavescens*. *Journal of Kunming University of Science and Technology (Natural Science)*, 43(4), 93-97. <https://doi.org/10.16112/j.cnki.53-1223/n.2018.04.013>
- Zhao, F. (2015). *Simultaneous analysis of chemical components and contents in various organs of Sophora Flavescens Ait.* [Master's thesis, Institute of Chinese Materia Medica China Academy of Chinese Medical Sciences]. China National Knowledge Infrastructure.
- Zhao, M., Yang, S., Sun, Y., Li, F., Zhang, S., & Jiao, J. (2018). Gas chromatography-mass



- spectrometry analysis of volatile oil of *Angelica sinensis* root dry chemical composition. *Chemical World*, 59(4), 231-234. <https://doi.org/10.19500/j.cnki.0367-6358.20170615>
- Zhou, J. L., Xin, G. Z., Shi, Z. Q., Ren, M. T., Qi, L. W., Li, H. J., & Li, P. (2010). Characterization and identification of steroidal alkaloids in *Fritillaria* species using liquid chromatography coupled with electrospray ionization quadrupole time-of-flight tandem mass spectrometry. *Journal of Chromatography A*, 1217(45), 7109-7122. <https://doi.org/10.1016/j.chroma.2010.09.019>
- Zhou, M., Ma, X., Ding, G., Wang, Z., Liu, D., Tong, Y., Zhou, H., Gao, J., Hou, Y., Jiang, M., & Bai, G. (2017). Comparison and evaluation of antimuscarinic and anti-inflammatory effects of five *Bulbus fritillariae* species based on UPLC-Q/TOF integrated dual-luciferase reporter assay, PCA and ANN analysis. *Journal of Chromatography B*, 1041-1042, 60-69. <https://doi.org/10.1016/j.jchromb.2016.12.012>
- Zhou, Y., Gao, X., Wu, C., & Wu, Y. (2014). Bioaccessibility and safety assessment of trace elements from decoction of "Zhebawei" herbal medicines by in vitro digestion method. *Journal of Trace Elements in Medicine and Biology*, 28(2), 173-178. <https://doi.org/10.1016/j.jtemb.2013.12.007>
- Zhu, H., Yang, Y.-N., Xu, K., Xie, J., Feng, Z.-M., Jiang, J.-S., & Zhang, P.-C. (2017). Sophopterocarpan A, a novel pterocarpine derivative with a benzotetrahydrofuran-fused bicyclo [3.3.1] nonane from *Sophora flavescens*. *Organic & Biomolecular Chemistry*, 15(26), 5480-5483. <https://doi.org/10.1039/c7ob01261f>
- Zhu, S. (2018). Screening of effective parts and separation analysis of chemical composition based on blood nourishing, blood circulation and laxative of *Angelica Sinensis* [Master's thesis, Gansu University of Chinese Medicine]. China National Knowledge Infrastructure.
- Zhu, S., Guo, S., Duan, J. A., Qian, D., Yan, H., Sha, X., & Zhu, Z. (2017). UHPLC-TQ-MS coupled with multivariate statistical analysis to characterize nucleosides, nucleobases and amino acids in *Angelicae Sinensis Radix* obtained by different drying methods. *Molecules*, 22(6), 918-918. <https://doi.org/10.3390/molecules22060918>
